# Supplementary material for: Organisation of testing services, structural barriers and facilitators of routine HIV self-testing during sexually transmitted infection consultations: a qualitative study of patients and providers in Abidjan, Côte d’Ivoire
Source: PubMed Central journal article supplement (PMC10900544; doi:10.1186/s12879-023-08625-x), 2024-02-27

## Formation de formateurs

### Dispensation de l'autotest de dépistage du VIH dans le cadre du projet ATLAS en Côte d'Ivoire

Manuel du Formateur :  
Module 1 – Contexte épidémiologique, politique  
et stratégique autour de l'intégration de l'ADVIH

# Sommaire

|                                                                                                                                            |           |
|--------------------------------------------------------------------------------------------------------------------------------------------|-----------|
| <b>MODULE 1 – CONTEXTE EPIDEMIOLOGIQUE, POLITIQUE ET STRATEGIQUE<br/>AUTOUR DE L'INTEGRATION DE L'AUTOTEST DE DÉPISTAGE DU VIH (ADVIH)</b> | <b>2</b>  |
| a. Résumé du contenu du module 1                                                                                                           | 2         |
| b. Fiche pédagogique du module 1                                                                                                           | 3         |
| c. Référentiel technique du module 1                                                                                                       | 5         |
| <br>                                                                                                                                       |           |
| <b>Séquence n°1</b>                                                                                                                        | <b>5</b>  |
| Introduction à la formation                                                                                                                | 5         |
| <br>                                                                                                                                       |           |
| <i>Sous-séquence 1.1 :</i><br>Présenter les objectifs de formation et le programme des 3 journées                                          | 5         |
| <br>                                                                                                                                       |           |
| <i>Sous-séquence 1.2 :</i><br>Recueillir les attentes des participants                                                                     | 7         |
| <br>                                                                                                                                       |           |
| <b>Séquence n°2</b>                                                                                                                        | <b>8</b>  |
| Introduction à l'ADVIH dans le contexte international                                                                                      | 8         |
| <br>                                                                                                                                       |           |
| <i>Sous-séquence 2.1 :</i><br>Expliquer le contexte international VIH/SIDA                                                                 | 8         |
| <br>                                                                                                                                       |           |
| <i>Sous-séquence 2.2 :</i><br>Présenter l'intégration de l'ADVIH comme nouvelle stratégie de dépistage                                     | 10        |
| <br>                                                                                                                                       |           |
| <i>Sous-séquence 2.3 :</i><br>Présenter les données épidémiologiques                                                                       | 11        |
| <br>                                                                                                                                       |           |
| <b>Séquence n°3</b>                                                                                                                        | <b>12</b> |
| Cadre légal, politique et stratégie nationale VIH et l'intégration de l'ADVIH                                                              | 12        |
| <br>                                                                                                                                       |           |
| <i>Sous-séquence 3.1 :</i> Rappeler les lois VIH de la zone d'intervention                                                                 | 12        |
| <br>                                                                                                                                       |           |
| <i>Sous-séquence 3.2 :</i> Rappeler la stratégie nationale de lutte contre<br>le VIH du pays de la zone d'intervention                     | 12        |
| <br>                                                                                                                                       |           |
| <b>Séquence n°4</b>                                                                                                                        | <b>15</b> |
| Stratégies et canaux de dispensation de l'ADVIH                                                                                            | 15        |
| <br>                                                                                                                                       |           |
| <i>Sous-séquence 4.1 :</i><br>Présenter le projet ATLAS                                                                                    | 15        |
| <br>                                                                                                                                       |           |
| <i>Sous-séquence 4.2 :</i><br>Présenter le public cible et les canaux de dispensation                                                      | 15        |

a. Résumé du contenu du module 1

**Durée :** ½ journée (4 heures, pauses incluses)

**Objectifs**

**pédagogiques :** A l'issue de ce module les participants seront capables :

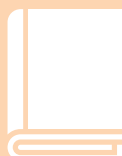

**Savoir :**

- D'expliquer l'ADVIH dans le contexte international, son intégration et sa plus-value.
- D'expliquer le cadre légal du VIH et de l'ADVIH dans les politiques et les stratégies nationales.
- D'expliquer les objectifs, les axes d'intervention, les populations cibles et les canaux de dispensation de l'ADVIH dans le projet ATLAS.

**Méthodologie :** Exposé, discussion avec les participants et quizz

**Le module est divisé en 4 séquences et 9 sous-séquences :**

1. Introduction à la formation

- 1.1 Présenter les objectifs de formation et le programme des 3 journées
- 1.2 Recueillir les attentes des participants

2. Introduction à l'ADVIH dans le contexte international

- 2.1 Expliquer le contexte international du VIH/SIDA
- 2.2 Présenter l'intégration de l'ADVIH comme nouvelle stratégie de dépistage
- 2.3 Présenter les données épidémiologiques

3. Cadre légal, politique, stratégie nationale VIH et intégration de l'ADVIH

- 3.1 Rappeler les lois VIH de la zone d'intervention
- 3.2 Rappeler la stratégie nationale de lutte contre le VIH du pays de la zone d'intervention

4. Stratégies et canaux de dispensation de l'autotest de dépistage du VIH

- 4.1 Présenter le projet ATLAS
- 4.2 Présenter le public cible et les canaux de dispensation

b. Fiche pédagogique du module 1

**JOUR 1 – matin**

| Horaire | Séquence                                              | Objectifs                                                                | Temps | Méthode                                                                                                                                                                                                                                                                                                                                                                                                                                                                                                               | Support                               | Observations                                                                                                                                                                                          |
|---------|-------------------------------------------------------|--------------------------------------------------------------------------|-------|-----------------------------------------------------------------------------------------------------------------------------------------------------------------------------------------------------------------------------------------------------------------------------------------------------------------------------------------------------------------------------------------------------------------------------------------------------------------------------------------------------------------------|---------------------------------------|-------------------------------------------------------------------------------------------------------------------------------------------------------------------------------------------------------|
| 9H00    | Introduction à la formation                           | Présenter les objectifs de formation et le programme des 3 journées      | 15mn  | Le formateur explique l'objectif global de formation et, brièvement, son lien avec la stratégie ATLAS (formation en cascade).<br>Le formateur présente les 4 modules de formation, leurs objectifs pédagogiques propres et le découpage temporel.                                                                                                                                                                                                                                                                     | PPT<br>« Support »<br>(diapo 2 à 5)   | Expliquer très succinctement le lien avec la stratégie ATLAS, car cela sera vu plus loin en détail.<br>Insister sur le fait que la formation alterne présentations théoriques et exercices pratiques. |
|         |                                                       | Recueillir les attentes des participants                                 | 15mn  | Les participants se répartissent en binôme et échangent sur leurs attentes et leurs craintes vis-à-vis de la formation.                                                                                                                                                                                                                                                                                                                                                                                               | -                                     |                                                                                                                                                                                                       |
|         |                                                       |                                                                          | 15mn  | Chaque binôme exprime ses attentes et ses craintes, le formateur les note au fur et à mesure et apporte les réponses nécessaires.                                                                                                                                                                                                                                                                                                                                                                                     | Flipchart<br>+<br>feutres             | Si certaines attentes ne peuvent pas être prises en compte, expliquez pourquoi et – si possible – proposez une solution aux participants.                                                             |
| 9H45    | Introduction à l'ADVIH dans le contexte international | Expliquer le contexte international VIH/SIDA                             | 10mn  | Exposer oral du formateur sur :<br>- Les objectifs des 90-90-90<br>- Les progrès atteints et gaps existants au niveau international<br>- L'importance du 1 <sup>er</sup> 90 et la position de l'ADVIH                                                                                                                                                                                                                                                                                                                 | PPT<br>« Support »<br>(diapo 6 à 9)   |                                                                                                                                                                                                       |
|         |                                                       | Présenter l'intégration de l'ADVIH comme nouvelle stratégie de dépistage | 5mn   | Le formateur demande aux participants ce qu'ils savent de l'ADVIH et de sa complémentarité avec le dépistage classique.                                                                                                                                                                                                                                                                                                                                                                                               |                                       |                                                                                                                                                                                                       |
|         |                                                       |                                                                          | 10mn  | Le formateur présente l'autotest de dépistage du VIH et insiste sur le fait que c'est efficace et sûr                                                                                                                                                                                                                                                                                                                                                                                                                 | PPT<br>« Support »<br>(diapo 10 à 13) |                                                                                                                                                                                                       |
|         |                                                       | Présenter les données épidémiologiques                                   | 15mn  | Quizz sur les données épidémiologiques et 3*90 au Sénégal, qui reprend les données de l'ADVIH.<br>- Les participants peuvent être répartis en équipe de 2 /3 personnes (mais attention à bien gérer le temps nécessaire pour la création des équipes)<br>- Le formateur affiche la question<br>- Les participants répondent, le gagnant est le premier à donner la bonne réponse. Si aucune bonne réponse ne se dégage rapidement, afficher la réponse<br>- Conclure sur les évidences scientifiques qui en découlent | PPT<br>« Support »<br>(diapo 14 à 16) |                                                                                                                                                                                                       |

| Horaire | Séquence                                                                      | Objectifs                                                                                | Temps | Méthode                                                                                                                                                                                                                                                                                      | Support                                                                                                | Observations |
|---------|-------------------------------------------------------------------------------|------------------------------------------------------------------------------------------|-------|----------------------------------------------------------------------------------------------------------------------------------------------------------------------------------------------------------------------------------------------------------------------------------------------|--------------------------------------------------------------------------------------------------------|--------------|
| 10H30   |                                                                               | Valider l'atteinte des objectifs de la séquence                                          | 5mn   | Avant de passer à la prochaine séquence, demander aux participants s'ils ont des questions et, le cas échéant, y répond.<br>Demander aux participants s'ils pensent être en mesure de reproduire cette séquence de formation et s'ils ont des questions par rapport à cet aspect.            | -                                                                                                      |              |
|         |                                                                               |                                                                                          |       | PAUSE CAFE (30MN)                                                                                                                                                                                                                                                                            |                                                                                                        |              |
| 11H00   | Cadre légal, politique et stratégie nationale VIH et l'intégration de l'ADVIH | Rappeler les lois VIH de la zone d'intervention                                          | 15mn  | Exposer oral du formateur sur le cadre légal au niveau de la zone d'intervention.                                                                                                                                                                                                            | PPT<br>« Support »<br>(diapo 17 à 32) à sélectionner en fonction du pays où est réalisée la formation) |              |
|         |                                                                               | Rappeler la stratégie nationale de lutte contre le VIH du pays de la zone d'intervention | 15mn  | <u>Exposer oral du formateur sur :</u><br>- L'ADVIH dans la stratégie nationale<br>- Synthèse et éléments de l'environnement national pour l'intégration de l'ADVIH                                                                                                                          |                                                                                                        |              |
|         |                                                                               | Présenter le projet ATLAS                                                                | 15mn  | <u>Exposé oral du formateur sur :</u><br>- Les objectifs du projet ATLAS<br>- Les données relatives au Mali<br>- Les partenaires du projet                                                                                                                                                   | PPT<br>« Présentation ATLAS »                                                                          |              |
| 11H30   | Stratégies et canaux de dispensation de l'ADVIH                               | Présenter le public cible et les canaux de dispensation                                  | 15mn  | Le formateur projette le schéma des canaux de dispensation et distribue aux participants la version papier. Le formateur présente tout d'abord les différents publics cibles et explique leurs particularités propres, en établissant le lien avec les raisons de ce choix.                  | Schéma des canaux de dispensation (papier) et PPT                                                      |              |
|         |                                                                               |                                                                                          | 30mn  | Le formateur explique la stratégie propre à chaque canal de diffusion, en partant du point d'entrée, ligne par ligne.<br>A chaque fois que cela est nécessaire, le formateur procède à la définition et à la différenciation entre :<br>- Distribution primaire<br>- Distribution secondaire | « Support »<br>(diapo 26 à 36)                                                                         |              |
| 12H35   |                                                                               | Valider l'atteinte des objectifs de la séquence et du module                             | 5mn   | Avant de clôturer le module, demander aux participants s'ils ont des questions et y répondre. Demander aux participants s'ils pensent être en mesure de reproduire cette séquence de formation et s'ils ont des questions par rapport à cet aspect.                                          | -                                                                                                      |              |
|         |                                                                               |                                                                                          |       | PAUSE DEJEUNER (1H)                                                                                                                                                                                                                                                                          |                                                                                                        |              |

c. Référentiel technique du module 1

|                               |                                                                                                                                                                                                                                                   |
|-------------------------------|---------------------------------------------------------------------------------------------------------------------------------------------------------------------------------------------------------------------------------------------------|
| <b>Séquence n°1</b>           | Introduction à la formation                                                                                                                                                                                                                       |
| <b>Objectifs pédagogiques</b> | A la fin de cette séquence, les participants auront :<br>– Compris les objectifs de la formation et le programme des 3 journées<br>– Exprimé leurs attentes et leurs interrogations vis-à-vis de la formation                                     |
| <b>Durée</b>                  | 45 minutes maximum                                                                                                                                                                                                                                |
| <b>Matériel</b>               | Pour réaliser cette séquence, le formateur aura besoin :<br>– Du support de présentation PPT<br>– D'un kit de projection (ordinateur, vidéoprojecteur, écran)<br>– D'un flipchart et de feutres de différentes couleurs (noir, rouge, bleu, vert) |

***Sous-séquence 1.1 : Présenter les objectifs de la formation et le programme des 3 journées***

**Durée :** 15 minutes

**Méthode :** En s'appuyant sur la présentation Power Point (PPT) mis à disposition :

- Le formateur explique l'objectif global de formation et, brièvement, son lien avec la stratégie ATLAS (formation en cascade) ;
- Le formateur présente les 4 modules de formation, leurs objectifs pédagogiques propres et le découpage temporel ;
- Le formateur insiste sur le fait que la formation alterne présentations théoriques et exercices pratiques.

**Référentiel technique :**

**Objectif global de la formation :** à l'issue de la formation, les participants seront capables de mettre en œuvre les formations à destination des différentes catégories d'acteurs, en proposant une animation adaptée et dynamique, intégrant l'ensemble du référentiel technique nécessaire.

**En termes de savoir, savoir-faire et savoir-être,** les participants seront capables :

| <b>Savoir</b>                                                                                                                                                                                                                                                                                                                                                                                                                                                                                                                                                                                                    | <b>Savoir-faire</b>                                                                                                                                                                                                                                                                                                                                                                                                                                                                                                | <b>Savoir-Être</b>                                                                                                                                                                                    |
|------------------------------------------------------------------------------------------------------------------------------------------------------------------------------------------------------------------------------------------------------------------------------------------------------------------------------------------------------------------------------------------------------------------------------------------------------------------------------------------------------------------------------------------------------------------------------------------------------------------|--------------------------------------------------------------------------------------------------------------------------------------------------------------------------------------------------------------------------------------------------------------------------------------------------------------------------------------------------------------------------------------------------------------------------------------------------------------------------------------------------------------------|-------------------------------------------------------------------------------------------------------------------------------------------------------------------------------------------------------|
| <ul style="list-style-type: none"> <li>- D'expliquer l'ADVIH en le plaçant dans le contexte international, son intégration et plus-value</li> <li>- D'expliquer le cadre légal du VIH et de l'ADVIH dans les politiques et les stratégies nationales</li> <li>- D'expliquer les concepts clés de dépistages et les supports disponibles</li> <li>- D'identifier les messages clefs, les questions fréquentes et réponses autour de l'ADVIH</li> <li>- De reproduire le dispositif global de formation en cascade au regard de la stratégie ATLAS</li> <li>- D'expliquer les principes de l'andragogie</li> </ul> | <ul style="list-style-type: none"> <li>- D'utiliser un autotest du VIH et en faire la démonstration</li> <li>- D'interpréter les résultats et orienter l'utilisateur vers les services adaptés</li> <li>- Dispenser l'autotest de dépistage du VIH aux usagers avec les différents supports disponibles</li> <li>- Réaliser les formations à destination des différents publics cibles, en fonction des spécificités de chacun d'entre eux</li> <li>- De concevoir et animer une formation pour adultes</li> </ul> | <ul style="list-style-type: none"> <li>- D'adopter une posture de formateur andragogue, véhiculant des valeurs d'écoute active, de conseil, de non-stigmatisation et de non-discrimination</li> </ul> |

**La formation est divisée en 4 modules de formations.** L'objectif est de préparer les formateurs et les formatrices nationaux du système public et certains responsables des partenaires de mise en œuvre, candidats au « pool de formateurs », à reproduire ces mêmes formations auprès des différentes catégories d'acteurs au regard de la stratégie ATLAS, à savoir : **les professionnels de santé, les pairs éducateurs et les écoutants hotline.**

|            | Jour 1                                                                                            | Jour 2                                                                                                                                             | Jour 3                                                                                                                                             |
|------------|---------------------------------------------------------------------------------------------------|----------------------------------------------------------------------------------------------------------------------------------------------------|----------------------------------------------------------------------------------------------------------------------------------------------------|
| Matin      | Module 1<br>Contexte épidémiologique, politique et stratégique autour de l'intégration de l'ADVIH | Module 3<br>Technique de formation en andragogie                                                                                                   | Module 4<br>Le rôle, les qualités attendues et la dispensation d'autotests de dépistage du VIH par les parties prenantes (2 <sup>ème</sup> partie) |
| Après-midi | Module 2<br>Présentation et utilisation de l'autotest de dépistage du VIH salivaire               | Module 4<br>Le rôle, les qualités attendues et la dispensation d'autotests de dépistage du VIH par les parties prenantes (1 <sup>ère</sup> partie) | Module 4<br>Le rôle, les qualités attendues et la dispensation d'autotests de dépistage du VIH par les parties prenantes (3 <sup>ème</sup> partie) |

**Le module 1 pose le cadre général de la formation.** Il situe l'ADVIH dans le contexte international et au sein du cadre légal de chacun des pays de la zone d'intervention (Côte d'Ivoire, Mali, Sénégal). Le projet ATLAS est introduit (objectifs, axes d'intervention, population cible, etc.).

**Le module 2 présente les éléments clés de la formation.** Il présente les concepts, les messages clés, les questions fréquentes et les réponses que les participants doivent maîtriser pour suivre l'ensemble de la formation et la répliquer. L'ADVIH est introduit et mis en pratique.

**Le module 3 aborde les techniques de formation en andragogie.** Il présente les concepts clés liés à l'andragogie, les spécificités des dispositifs de formation pour les adultes, et invite à l'exercice des principales méthodes de formation qui seront employées lors de la réplification du module 4 auprès des différentes catégories d'acteurs. Ce module n'est dispensé que dans le cadre de la formation de formateurs.

**Le module 4 explique en détail la stratégie de dépistage, le principe de l'ADVIH et de son intégration.** C'est le module le plus axé sur la pratique, in fine il ambitionne d'autonomiser les parties prenantes à dispenser l'autotest de dépistage du VIH, tout en véhiculant des valeurs d'écoute active, de conseil, de non-stigmatisation et de non-discrimination.

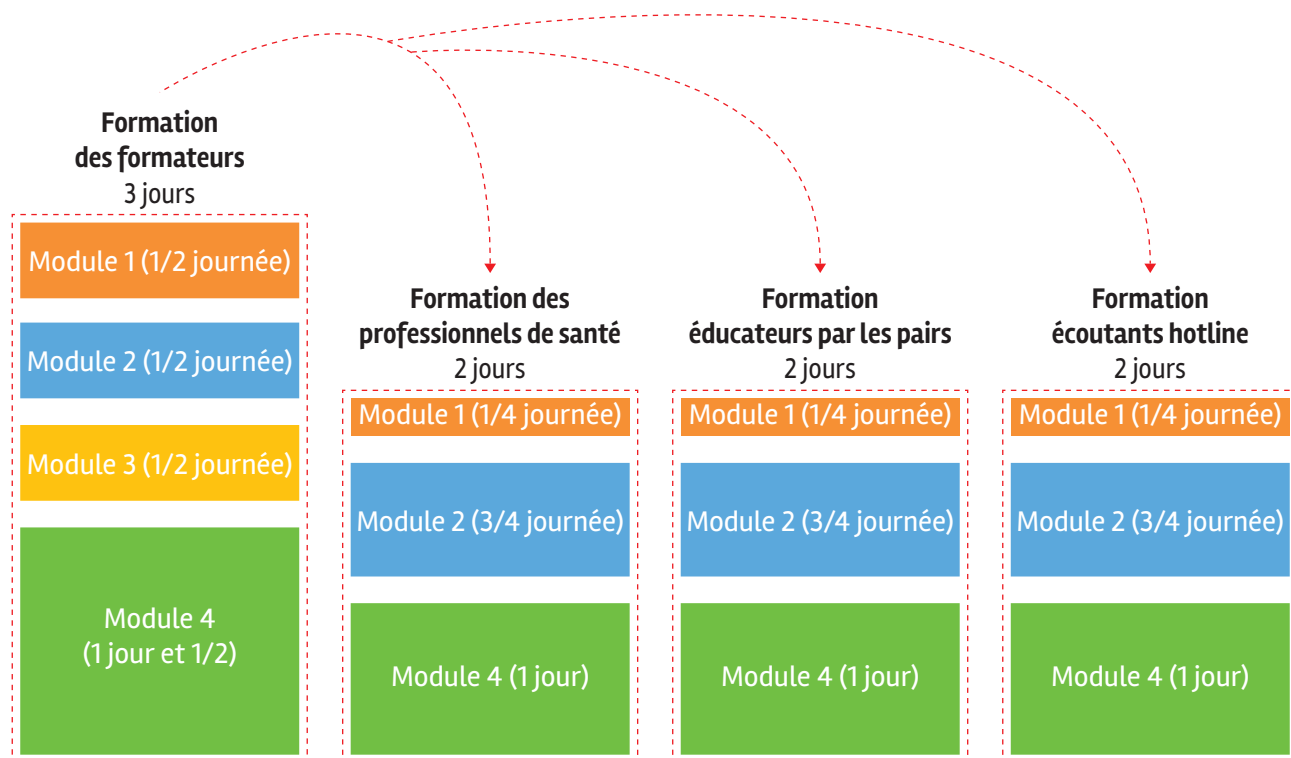

### **Sous-séquence 1.2 : Recueillir les attentes des participants**

**Durée :** 15 minutes (travaille en binôme) + 15 minutes (restitution et synthèse)

**Méthode :** En utilisant les feutres et le flipchart, le formateur procède à l'animation suivante :

- Les participants se répartissent en binôme et échangent sur leurs attentes et ses craintes vis-à-vis de la formation ;
- Chaque binôme exprime ses attentes et craintes, le formateur les note au fur et à mesure et apporte les réponses nécessaires ;
- Si certaines attentes ne peuvent pas être prises en compte, expliquez pourquoi et si possible proposez une solution aux participants.



|                               |                                                                                                                                                                                                                                                           |
|-------------------------------|-----------------------------------------------------------------------------------------------------------------------------------------------------------------------------------------------------------------------------------------------------------|
| <b>Séquence n°2</b>           | Introduction à l'ADVIH dans le contexte international                                                                                                                                                                                                     |
| <b>Objectifs pédagogiques</b> | A la fin de cette séquence, les participants auront :<br>– Compris le contexte international VIH/SIDA<br>– Découvert l'ADVIH et compris son intégration comme nouvelle stratégie de dépistage<br>– Intégré les données épidémiologiques de la sous-région |
| <b>Durée</b>                  | 45 minutes maximum                                                                                                                                                                                                                                        |
| <b>Matériel</b>               | Pour réaliser cette séquence, le formateur aura besoin :<br>– Du support de présentation PPT<br>– D'un kit de projection (ordinateur, vidéoprojecteur, écran)                                                                                             |

### **Sous-séquence 2.1 : Expliquer le contexte international VIH/SIDA**

**Durée :** 10 minutes

**Méthode :** En s'appuyant sur la présentation Power Point (PPT) mise à disposition :

- Les objectifs des 90-90-90 ;
- Les progrès atteints et gaps existants au niveau international ;
- L'importance du 1<sup>er</sup> 90 et la position de l'ADVIH.

#### **Référentiel technique<sup>1</sup> :**

En Décembre 2013, le Conseil de Coordination du Programme de l'ONUSIDA a invité l'ONUSIDA à soutenir les efforts des pays et des régions pour déterminer de nouvelles cibles pour le passage à échelle du traitement du VIH au-delà de 2015. En réponse à cet appel, des consultations des différentes parties prenantes sur de nouvelles cibles ont été organisées dans toutes les régions du monde. Au niveau mondial, les acteurs se sont réunis pour des consultations thématiques axées sur la société civile, les laboratoires médicaux, le traitement pédiatrique du VIH, les adolescents et sur d'autres questions majeures. A présent, un fort élan voit le jour en faveur d'un nouvel argumentaire sur le traitement du VIH et d'une cible finale tout à la fois ambitieuse et réalisable :

- A l'horizon 2020, 90% des personnes vivant avec le VIH connaissent leur statut sérologique.
- A l'horizon 2020, 90% de toutes les personnes infectées par le VIH dépistées reçoivent un traitement anti rétroviral durable.
- A l'horizon 2020, 90% des personnes recevant un traitement antirétroviral ont une charge virale durablement indétectable.

Pour que la riposte mondiale au VIH atteigne ces objectifs, il est essentiel que chaque personne connaisse son statut sérologique au regard du VIH, ainsi que celui de son partenaire. Le but essentiel des services de dépistage du VIH consiste à établir un diagnostic et à faciliter l'accès et le recours aux services de prévention, de traitement et de soins de l'infection à VIH. Ces interventions à fort impact sont susceptibles de réduire la transmission du VIH, ainsi que la morbidité et la mortalité associées à l'infection.

<sup>1</sup>ONUSIDA/UNAIDS, Ending AIDS, Progress towards the 90-90-90 targets, 2017 et <http://aidsinfo.unaids.org/>

Au cours des quinze dernières années, les efforts de dépistage du VIH se sont considérablement intensifiés à l'échelle mondiale. En 2005, on estimait que seules 10 % des personnes vivant avec le VIH en Afrique avaient connaissance de leur statut pour le VIH et qu'à l'échelle mondiale, seules 12 % des personnes qui souhaitent se soumettre à un dépistage du VIH avaient la possibilité de le faire. Les données montrent que des progrès remarquables ont été réalisés dans l'atteinte des objectifs 90-90-90. Ainsi plus de deux tiers de l'ensemble des personnes vivant avec le VIH – environ 70% [51-84%] – connaissent leur statut sérologique en 2016. Ces accomplissements ont en grande partie été possibles grâce à l'utilisation généralisée de traitements efficaces contre l'infection à VIH et à la large disponibilité de tests de diagnostic rapide (TDR) peu coûteux. La disponibilité et l'utilisation accrues des TDR ont favorisé le partage des tâches, permettant au dépistage d'être également effectué par des prestataires de soins non professionnels et d'être mis en œuvre dans un plus grand nombre de contextes, qu'il s'agisse d'établissements de santé assurant un dépistage systématique ou de services au niveau communautaire.

Malgré ces progrès, des lacunes importantes persistent en matière de dépistage, avec en 2016 près de 8 millions de personnes vivant avec le VIH qui ne connaissent toujours pas leur statut. En Afrique de l'Ouest et du Centre, la connaissance du statut VIH chez les personnes vivant avec le VIH ne cesse d'augmenter au fil du temps, mais le rythme d'augmentation est insuffisant pour atteindre la cible à 90 % d'ici 2020. En 2017, moins de la moitié 48 % [31-68 %] des personnes vivant avec le VIH en Afrique de l'Ouest et du Centre connaissent leur statut VIH. Ce chiffre se compare aux 38 % [24-59] des personnes connaissant leur statut parmi les personnes vivant avec le VIH dans la région en 2015 et 43 % [27-59 %] en 2016.

En outre, bien que la disponibilité des tests et la couverture du dépistage progressent chaque année un peu plus, on constate que, trop souvent, les services de dépistage ne sont pas suffisamment ciblés. Nombre de personnes à haut risque d'infection, notamment parmi les hommes, les partenaires de personnes vivant avec le VIH, les adolescents et les jeunes dans les zones de forte prévalence du VIH et les populations clés à l'échelle mondiale, ne sont pas couvertes par les services de dépistage.

L'autotest de dépistage du VIH est un outil innovant qui favorise l'autonomisation de la personne, permet de diagnostiquer davantage de personnes VIH-positives et aide à atteindre la première des cibles 90 90 90 des Nations-Unies : faire en sorte que, d'ici à 2020, 90 % des personnes vivant avec le VIH connaissent leur statut sérologique. Étendre l'utilisation de l'ADVIH contribue à ces objectifs mondiaux en encourageant d'abord ceux qui se font dépister pour la première fois, les personnes VIH positives non diagnostiquées et les sujets constamment exposés au risque (qui doivent se faire dépister régulièrement). L'OMS a officiellement posé la recommandation suivante : **L'autotest de dépistage du VIH devrait être proposé comme approche supplémentaire aux services de dépistage du VIH.**

Cet outil a d'ores et déjà été expérimenté/introduit dans de nombreux pays notamment en Europe, aux Etats Unis, au Canada, en Afrique Australe (programme STAR financé par UNITAID), en Afrique de l'Est (Kenya, Ouganda) ou en Asie (Vietnam).

#### Messages clés pour le formateur :

- Présentation des objectifs 90-90-90 : Dépistage, traitement, charge virale ;
- Connaître son statut est essentiel pour atteindre ces objectifs particulièrement le 1<sup>er</sup> 90 ;
- Des améliorations en termes de dépistage depuis 15 ans avec notamment le développement du dépistage communautaire mais cela reste un défi :
  - Particulièrement en Afrique de l'Ouest avec 1<sup>er</sup> 90 à 48% seulement ;
  - Il faut particulièrement cibler les personnes à haut risque d'infection notamment les partenaires de PVVIH et les populations clés qui ont peu accès au dépistage.
- L'autotest de dépistage du VIH est un outil innovant qui permet de contribuer à l'atteinte du premier 90 et est recommandé par l'OMS comme une approche supplémentaire de dépistage du VIH.

## **Sous-séquence 2.2 : Présenter l'intégration de l'ADVIH comme nouvelle stratégie de dépistage**

**Durée :** 5 minutes de questions/réponses + 10 minutes de présentation de l'autotest de dépistage du VIH

**Méthode :** En s'appuyant sur la présentation Power Point (PPT) mise à disposition :

- Le formateur demande aux participants ce qu'ils savent de l'ADVIH et de sa complémentarité avec le dépistage classique ;
- Le formateur présente les principaux éléments du référentiel technique et insiste sur le fait que l'autotest de dépistage du VIH est un outil efficace et sûr.

### **Référentiel technique :**

L'ADVIH complète les offres de dépistage classique. **Il permet de ce fait d'atteindre des populations qui jusque-là n'avaient pas accès au dépistage** du fait notamment des barrières d'accès à la santé comme la discrimination, la stigmatisation, la distance ou le coût.

Le guide développé par l'OMS en 2016 met en exergue les éléments suivants issus des différentes expériences réalisées :

- Pour nombre d'utilisateurs, l'ADVIH favorise **la discrétion et bénéficie d'une forte acceptabilité, notamment auprès des populations clés**, hommes, jeunes, prestataires de soins, femmes enceintes et leurs partenaires de sexe masculin, couples et population en général ;
- L'ADVIH **représente une avancée pour accroître l'autonomie des personnes, décentraliser les services et créer la demande de dépistage du VIH** chez les populations sans accès aux services actuels ;
- **L'ADVIH peut donner des résultats aussi fiables que lorsqu'il est utilisé par un prestataire formé**, sous réserve que les produits utilisés répondent aux normes de qualité, de sécurité et de performance (ce qui est le cas du test OraQuick, pré qualifié OMS). Les démonstrations en personne et la mise à disposition d'autres moyens d'information, comme des vidéos, peuvent également contribuer à une meilleure performance des autotests du VIH ;

Les autotests de dépistage du VIH peuvent être distribués selon différentes modalités dans les secteurs public et privé, notamment au niveau communautaire, dans les établissements de santé ou par internet. Les utilisateurs peuvent aussi parfois choisir entre un TDR oral ou sanguin aux fins de l'auto dépistage du VIH. Ainsi, différentes populations peuvent bénéficier d'un large éventail d'options d'autotest de dépistage du VIH.

### **Par ailleurs les expériences montrent que l'ADVIH :**

- **Multiplie par plus de 2 le recours au dépistage du VIH chez les hommes ayant des rapports sexuels avec des hommes**, chez les partenaires masculins des femmes enceintes ou venant d'accoucher ;
- **Augmente le recours au dépistage du VIH chez les couples**, notamment chez les partenaires de sexe masculin des femmes enceintes ou des femmes en post partum ;
- **Peut identifier un pourcentage équivalent ou supérieur de personnes VIH positives ;**
- **Ne renforce pas les comportements à risque** (comme les rapports anaux sans préservatif) ni le nombre d'infections sexuellement transmissibles (IST) ;
- **Ne réduit pas le recours ou la fréquence de dépistage des IST ;**
- **N'accroît pas les conséquences sociales négatives, ni les événements ou comportements indésirables ;**
- **Donne d'aussi bons résultats qu'un TDR du VIH utilisé et interprété par un travailleur de la santé qualifié.**

## En quoi l'autotest réduit-il les barrières d'accès au dépistage ?

### Barrières d'accès au dépistage

- Temps
- Volonté de discrétion
- Stigmatisation et discrimination
- Transport (coût et disponibilité)
- Attitudes du personnel de santé
- Peur de connaître son statut
- Deni
- Annonce aux proches
- Accessibilité
- Confidentialité

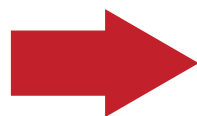

### Barrières réduites par l'auto dépistage

- **Temps**
- **Volonté de discrétion**
- **Stigmatisation et discrimination**
- **Transport (coût et disponibilité)**
- **Attitudes du personnel de santé**
- Peur de connaître son statut
- Deni
- Annonce aux proches
- Accessibilité
- **Confidentialité**

## En résumé, les avantages de l'autotest sont :

- **Rapide** : donne le résultat en 20 minutes
- **Pratique** : pas besoin de se déplacer en centre de santé
- **Favorise l'autonomisation** (empowerment) des personnes
- **Discrétion** – réduit la peur de la stigmatisation
- **Forte acceptabilité** (population générale et populations-clés)
- **Efficace et fiable**
- Permet de **créer la demande pour le dépistage VIH** chez les populations qui n'ont pas accès aux services actuels
- **N'a pas démontré de conséquences sociales et comportementales négatives** (violences, suicide, comportements à risque)

### Sous-séquence 2.3 : Présenter les données épidémiologiques

**Durée** : 15 minutes

**Méthode** : Le formateur anime un quizz sur les données épidémiologiques et 3\*90 dans la sous-région, qui reprend les données de l'ADVIH :

- Les participants peuvent être répartis en équipe de 2 à 3 personnes (mais attention à bien gérer le temps nécessaire pour la création des équipes) ;
- Le formateur affiche la question ;
- Les participants répondent, le gagnant et le premier à donner la bonne réponse. Si aucune bonne réponse ne se dégage rapidement, afficher la réponse ;
- Conclure sur les évidences scientifiques qui en découlent.

**Avant de clôturer la séquence, le formateur demande aux participants s'ils ont des questions et y répond. Demander aux participants s'ils pensent être en mesure de reproduire cette séquence de formation et s'ils ont des questions par rapport à cet aspect.**

|                               |                                                                                                                                                                                                                                        |
|-------------------------------|----------------------------------------------------------------------------------------------------------------------------------------------------------------------------------------------------------------------------------------|
| <b>Séquence n°3</b>           | Cadre légal, politique et stratégie nationale VIH et l'intégration de l'ADVIH                                                                                                                                                          |
| <b>Objectifs pédagogiques</b> | A la fin de cette séquence, les participants auront :<br>- Compris les lois VIH des différents pays de la zone d'intervention<br>- Compris la stratégie nationale de lutte contre le VIH des différents pays de la zone d'intervention |
| <b>Durée</b>                  | 30 minutes maximum                                                                                                                                                                                                                     |
| <b>Matériel</b>               | Pour réaliser cette séquence, le formateur aura besoin :<br>- Du support de présentation PPT<br>- D'un kit de projection (ordinateur, vidéoprojecteur, écran)                                                                          |

### **Sous-séquence 3.1 : Rappeler les lois VIH de la zone d'intervention**

**Durée :** 15 minutes

**Méthode :** En s'appuyant sur la présentation Power Point (PPT) mise à disposition, le formateur réalise un exposé oral sur le cadre légal au niveau de la zone d'intervention.

### **Sous-séquence 3.2 : Rappeler la stratégie nationale de lutte contre le VIH du pays de la zone d'intervention**

**Durée :** 15 minutes

**Méthode :** En s'appuyant sur la présentation Power Point (PPT) mise à disposition, le formateur réalise :

- Un exposé oral sur la stratégie nationale en incluant l'ADVIH ;
- Une synthèse et éléments de l'environnement national pour l'intégration de l'ADVIH.

**ATTENTION : le référentiel technique qui suit est commun aux séquences 3.1 et 3.2. Le référentiel technique présente les informations relatives aux trois pays de la zone d'intervention, il convient donc de sélectionner le contenu en fonction du pays où est réalisée la formation (idem pour le support PPT).**

#### **Référentiel technique :**

Les pages suivantes présentent l'ensemble du référentiel technique pour les trois pays couverts par la zone d'intervention du programme ATLAS. Les informations sont présentées dans un tableau en deux parties :

- La première partie concerne **les éléments clés du cadre légal et de la loi VIH du pays** (séquence 3.1) ;
- La deuxième partie concerne **l'ADVIH dans la stratégie nationale** (séquence 3.2) ;
- S'ensuit un encart résumant **l'ensemble des informations clés à retenir pour le pays** (séquence 3.2).

**Avant de clôturer la séquence, le formateur demande aux participants s'ils ont des questions et, le cas échéant, il répond.**

**Demander aux participants s'ils pensent être en mesure de reproduire cette séquence de formation et s'ils ont des questions par rapport à cet aspect.**

## COTE D'IVOIRE

| <b>Éléments clés du cadre légal et la loi VIH à connaître</b>                                                                                                                                                                                                                                                                                                                                                                                                                                                                                                                                                                                                                               |                                                                                                                                                                                                                                                                                                                                                                                                                                                                                                                                                                                                                                                                                                                                                                                                                                                                                                                                                                                                                                                                                                                                                                                                                                                                                                                                                                                                                                                                                                                                                                                                                                                                                                                                                                                   |
|---------------------------------------------------------------------------------------------------------------------------------------------------------------------------------------------------------------------------------------------------------------------------------------------------------------------------------------------------------------------------------------------------------------------------------------------------------------------------------------------------------------------------------------------------------------------------------------------------------------------------------------------------------------------------------------------|-----------------------------------------------------------------------------------------------------------------------------------------------------------------------------------------------------------------------------------------------------------------------------------------------------------------------------------------------------------------------------------------------------------------------------------------------------------------------------------------------------------------------------------------------------------------------------------------------------------------------------------------------------------------------------------------------------------------------------------------------------------------------------------------------------------------------------------------------------------------------------------------------------------------------------------------------------------------------------------------------------------------------------------------------------------------------------------------------------------------------------------------------------------------------------------------------------------------------------------------------------------------------------------------------------------------------------------------------------------------------------------------------------------------------------------------------------------------------------------------------------------------------------------------------------------------------------------------------------------------------------------------------------------------------------------------------------------------------------------------------------------------------------------|
| <b>Populations clés</b>                                                                                                                                                                                                                                                                                                                                                                                                                                                                                                                                                                                                                                                                     | Pas de loi criminalisant les rapports sexuels d'hommes avec les hommes, ni le travail du sexe.                                                                                                                                                                                                                                                                                                                                                                                                                                                                                                                                                                                                                                                                                                                                                                                                                                                                                                                                                                                                                                                                                                                                                                                                                                                                                                                                                                                                                                                                                                                                                                                                                                                                                    |
| <b>Dépistage</b>                                                                                                                                                                                                                                                                                                                                                                                                                                                                                                                                                                                                                                                                            | Le test de dépistage doit être volontaire, faire l'objet d'un consentement libre et éclairé et être accompagné de conseils et d'une assistance psychologique avant et après le test. Toute personne âgée de seize ans a le droit de faire seule le test de dépistage du VIH. Le test de dépistage doit être réalisé dans les conditions garantissant l'anonymat et la confidentialité médicale. Les services publics de conseil et dépistage sont accessibles gratuitement                                                                                                                                                                                                                                                                                                                                                                                                                                                                                                                                                                                                                                                                                                                                                                                                                                                                                                                                                                                                                                                                                                                                                                                                                                                                                                        |
| <b>Notification</b>                                                                                                                                                                                                                                                                                                                                                                                                                                                                                                                                                                                                                                                                         | Toute personne vivant avec le VIH et connaissant son statut, est tenue d'annoncer son statut sérologique à son conjoint et à ses partenaires sexuels. Faute pour la personne dont le statut sérologique vient d'être connu de se soumettre volontairement à l'obligation d'annonce prévue par la loi, le médecin ou tout autre personnel paramédical qualifié de l'établissement hospitalier ou de la structure sanitaire concernée, après l'en avoir informée, peut, s'il y a lieu, dans un délai de trois mois, faire l'annonce au conjoint ou au partenaire sexuel. Dans l'hypothèse où la personne dont le statut sérologique vient d'être connu laisse le soin au médecin ou à tout autre personnel paramédical qualifié de faire l'annonce à son conjoint ou à son partenaire sexuel, le consentement donné ne vaut que pour la personne à laquelle elle voudrait révéler son statut.                                                                                                                                                                                                                                                                                                                                                                                                                                                                                                                                                                                                                                                                                                                                                                                                                                                                                       |
| <b>Dispositions pénales</b>                                                                                                                                                                                                                                                                                                                                                                                                                                                                                                                                                                                                                                                                 | <ul style="list-style-type: none"> <li>- Toute discrimination ou stigmatisation à l'égard des PVVIH est interdite et punie d'un emprisonnement de 3 à 12 mois et d'une amende de 20 000 à 1 000 000 FCFA</li> <li>- De la sanction des auteurs de transmission volontaire du VIH               <ul style="list-style-type: none"> <li>• Est punie d'un emprisonnement et d'amende, toute personne qui, connaissant son statut sérologique positif et les modes de transmission du VIH, entreprend des rapports sexuels non protégés avec l'intention de transmettre à une autre personne ou par maladresse, inattention, imprudences. Nul ne pourra être poursuivi ni jugé aux termes de cette loi pour transmission VIH, ou pour exposition au VIH, lorsque ladite transmission ou exposition se produit dans l'un des cas suivants :                   <ul style="list-style-type: none"> <li>▷ La transmission VIH de la mère à l'enfant avant la naissance de celui-ci, pendant l'accouchement ou au cours de l'allaitement ;</li> <li>▷ Un acte qui ne pose aucun risque significatif de transmission du VIH ;</li> <li>▷ La personne vivant avec le VIH ne connaissant pas son statut sérologique positif au moment de l'acte ;</li> <li>▷ La personne vivant avec le VIH a pratiqué des relations sexuelles sans risque y compris avec l'usage du préservatif ;</li> <li>▷ Une PVVIH ayant informé son/sa partenaire sexuel ;</li> <li>▷ Une PVVIH n'ayant pas informé son/sa partenaire par crainte des représailles.</li> </ul> </li> <li>• Sera punie d'un emprisonnement de 3 mois à 3 ans, et d'une amende de 100 000 à 1 000 000 de francs CFA, quiconque révèle l'état sérologique d'une personne infectée par le VIH sans son consentement.</li> </ul> </li> </ul> |
| <b>L'ADVIH dans la stratégie nationale VIH</b>                                                                                                                                                                                                                                                                                                                                                                                                                                                                                                                                                                                                                                              |                                                                                                                                                                                                                                                                                                                                                                                                                                                                                                                                                                                                                                                                                                                                                                                                                                                                                                                                                                                                                                                                                                                                                                                                                                                                                                                                                                                                                                                                                                                                                                                                                                                                                                                                                                                   |
| <b>Environnement favorable</b> à l'introduction de l'ADVIH : <ul style="list-style-type: none"> <li>- ADVIH mentionné dans le Plan stratégique national de lutte contre le VIH et les IST 2016–2020</li> <li>- ADVIH et notification présente dans les politiques, normes et protocoles des services de dépistage du VIH</li> <li>- 2016 même s'il n'est pas intégré dans l'algorithme de dépistage/confirmation à ce stade.</li> <li>- Groupe de travail national autour du dépistage</li> <li>- Développement du dépistage communautaire</li> <li>- Des initiatives parallèles notamment le PEPFAR avec intégration de 42 000 autotests de dépistage du VIH dans leur COP 2018</li> </ul> |                                                                                                                                                                                                                                                                                                                                                                                                                                                                                                                                                                                                                                                                                                                                                                                                                                                                                                                                                                                                                                                                                                                                                                                                                                                                                                                                                                                                                                                                                                                                                                                                                                                                                                                                                                                   |

## Messages clés pour la Côte d'Ivoire

- Non criminalisation de l'homosexualité et du travail du sexe même si population fortement discriminée socialement ;
- La loi VIH pose un cadre légal facilitant l'accès au dépistage gratuit, anonyme et volontaire ;
- La loi VIH régleme la notification aux partenaires obligeant toute PVVIH à annoncer son statut à son conjoint/partenaires sexuels. Les prestataires de santé doivent accompagner ce processus de notification ;
- Peines encourues pour la discrimination des PVVIH, la transmission du VIH, le non-respect de la confidentialité sans accord de la PVVIH ;
- Les stratégies VIH, politiques normes et procédures du dépistage VIH intègrent d'ores et déjà l'utilisation de l'ADVIH même si son intégration nécessite d'être approfondie (algorithme dépistage et confirmation etc.) créant un environnement favorable à l'intégration de l'ADVIH.

|                               |                                                                                                                                                                                                                                                                                                                                |
|-------------------------------|--------------------------------------------------------------------------------------------------------------------------------------------------------------------------------------------------------------------------------------------------------------------------------------------------------------------------------|
| <b>Séquence n°4</b>           | Stratégies et canaux de dispensation de l'ADVIH                                                                                                                                                                                                                                                                                |
| <b>Objectifs pédagogiques</b> | A la fin de cette séquence, les participants auront :<br>- Compris le fonctionnement du projet ATLAS<br>- Identifié le public cible du projet et les principaux canaux de dispensation                                                                                                                                         |
| <b>Durée</b>                  | 45 minutes maximum                                                                                                                                                                                                                                                                                                             |
| <b>Matériel</b>               | Pour réaliser cette séquence, le formateur aura besoin :<br>- Du support de présentation PPT<br>- De la version numérique du schéma des canaux de dispensation<br>- De la version papier du schéma des canaux de dispensation (à distribuer aux participants)<br>- D'un kit de projection (ordinateur, vidéoprojecteur, écran) |

#### **Sous-séquence 4.1 : Présenter le projet ATLAS**

**Durée :** 15 minutes

**Méthode :** En s'appuyant sur la présentation Power Point (PPT) mise à disposition, le formateur présente :

- Les objectifs du projet ATLAS ;
- Les axes d'intervention du projet ;
- Les partenaires du projet.

#### **Sous-séquence 4.2 : Présenter le public cible et les canaux de dispensation**

**Durée :** 15 minutes (distribution du support papier et présentation des canaux) + 30 minutes (explication de la stratégie propre à chaque canal de diffusion)

**Méthode :** En s'appuyant sur la présentation Power Point (PPT) mise à disposition :

- Le formateur projette le schéma des canaux de dispensation et distribue aux participants la version papier ;
- Le formateur présente tout d'abord les différents publics cibles et explique leurs particularités propres, en établissant le lien avec les raisons de ce choix ;
- Le formateur explique la stratégie propre à chaque canal de dispensation, en partant du point d'entrée, ligne par ligne ;
- A chaque fois que cela est nécessaire, le formateur procède à la définition et à la différenciation entre :
  - Distribution primaire
  - Distribution secondaire



## Référentiel technique :

### Présentation des populations ciblées par le projet ATLAS – pourquoi ces populations ?

#### Les populations clés difficiles à atteindre

Comme mentionné précédemment, des gaps dans l'accès au dépistage existent malgré les progrès effectués ces dernières années en Afrique de l'Ouest et l'ADVIH offre une opportunité unique d'atteindre certaines populations qui ne se dépistent pas à ce jour.

Particulièrement l'accès au service de dépistage pour une large proportion des populations clés à savoir les HSH et les travailleuses du sexe est insuffisant alors que les prévalences VIH parmi ces populations sont importantes.

Ainsi il reste un nombre significatif de personnes vivant avec le VIH parmi ces populations qui ne connaissent pas leur statut, ne se soignent pas et ainsi risquent de contaminer d'autres personnes.

Pour rappel, une PVVIH sous ARV et avec une charge virale indétectable présente un risque de contamination négligeable.

#### Parmi ces populations, certaines sont ainsi plus difficile à atteindre car :

- Elles ne fréquentent pas les services de santé notamment du fait de leur stigmatisation/discrimination ;
- Elles ne fréquentent pas les associations de leur communauté ;
- Elles ne se reconnaissent pas elle-même comme faisant partie des populations clés (exemple : travailleuses du sexe occasionnelles, hommes mariés et ayant des relations sexuelles avec les hommes) ;
- Elles ne se reconnaissent pas à risque d'avoir le VIH.

Ces populations clés difficiles à atteindre et leurs partenaires sont une cible prioritaire pour le projet ATLAS.

#### De plus d'autres populations sont des cibles prioritaires du projet ATLAS car elles présentent un risque d'infection à VIH plus important que la population générale à savoir :

- Les clients des travailleuses du sexe qui jouent un rôle important dans la dynamique de l'épidémie VIH dans la sous-région ;
- Les partenaires des PVVIH qui sont à risque significatif d'être séropositifs du fait du statut de leur partenaire ;
- Les personnes diagnostiquées avec une infection sexuellement transmissible et leur partenaire du fait du risque plus élevé d'avoir le VIH (pour rappel le dépistage VIH est une indication médicale en cas d'infection sexuellement transmissible).
- Les UD et leur partenaire.

## Explication des canaux de dispensation

**Rappel important** : la dispensation de l'autotest de dépistage du VIH s'accompagne obligatoirement de conseils et informations nécessaires à la bonne réalisation, interprétation des résultats et conduite à tenir. Nous aborderons plus tard ces éléments dans la formation ainsi que les modalités concrètes de dispensation.

### 1. Dépistage des Cas Index : Distribution secondaire pour les partenaires des PVVIH

**A travers les consultations des PVVIH** (stratégie fixe /point d'entrée sur le schéma), où à travers le dépistage de femmes en PTME), **l'objectif est que le professionnel de santé** (Dispensateur dans le schéma) **accompagne la PVVIH** (distribution primaire dans le schéma) **à dévoiler son statut à son/sa/ses partenaires** (distribution secondaire dans le schéma) **afin qu'il/elle se dépiste en proposant notamment l'autotest** de dépistage VIH (parfois les partenaires ne désirent pas venir jusqu'au centre pour se dépister).

**La PVVIH n'est pas bénéficiaire de l'ADVIH** (elle connaît son statut et risque d'avoir un résultat faux négatif si elle est sous ARV)

### 2. Dépistage lors des consultations IST : Distribution secondaire pour les partenaires des personnes diagnostiquées avec une IST mais aussi une offre alternative pour le patient ayant une IST (distribution primaire)

**Lors d'une consultation IST** (stratégie fixe/point d'entrée dans le schéma), **le professionnel de la santé** (dispensateur dans le schéma) **doit proposer à la personne diagnostiquée avec une IST** (distribution primaire dans le schéma) **un dépistage du VIH : C'est une indication médicale car le risque de VIH positif est plus élevé parmi ces personnes**. En général le dépistage se fait au sein du centre dans lequel la consultation IST est effectuée.

**La cible prioritaire de l'auto dépistage est donc le partenaire de la personne diagnostiquée avec une IST.**

### 3. Dépistage des populations clés (Hommes ayant des relations sexuelles avec des hommes, usagers et usagers de drogue et travailleuses du sexe) :

#### Les HSH dans le projet ATLAS

Nous comprenons dans le cadre du projet ATLAS par HSH, les hommes ayant des relations sexuelles avec des hommes (avec ou sans transaction financière) y les personnes transgenres.

Les cibles prioritaires du projet ATLAS en lien avec les HSH sont donc :

- Leurs partenaires (hommes ou femmes) ;
- Leurs potentiels clients (dans le cas où il y a des relations avec transaction) ;
- Leurs amis/pairs cachés ne fréquentant pas les associations communautaires ou les services de santé.

#### Les professionnelles/travailleuses du sexe dans le projet ATLAS

Nous comprenons dans le cadre du projet ATLAS par TS, les femmes ayant des relations sexuelles avec transaction (financière ou non). Cela comprend ainsi les travailleuses régulières qu'elles soient déclarées et fixes ou qu'elles soient clandestines, que leur activité soit régulière ou occasionnelle (étudiantes, vendeuses ambulante, etc.)

Les cibles prioritaires du projet ATLAS en lien avec les TS/PS sont donc :

- Leurs partenaires ;
- Leurs clients ;
- Leurs amies/pairs cachées ne fréquentant pas les associations communautaires ou les services de santé.

## Les usagères et usagers de drogue (UD)

Nous comprenons dans le cadre du projet ATLAS par UD, les personnes consommant des produits stupéfiants qu'elles se les injectent ou pas. En effet, au-delà du risque de contamination par l'échange de seringues souillées, la consommation de stupéfiant engendre souvent d'autres comportements présentant des risques de contamination au VIH (relations sexuelles non protégées).

Les cibles prioritaires du projet ATLAS en lien avec les UD sont donc :

- Leurs partenaires ;
- Leurs amis/pairs cachés ne fréquentant pas les associations communautaires ou les services de santé.

### **Stratégie Fixe pour les HSH, travailleuses du sexe et usagères et usagers de drogue :**

Lors de consultations au sein d'un centre dédié aux populations clés (stratégie fixe/point d'entrée dans le schéma), les professionnels de la santé (dispensateur dans le schéma) proposeront aux populations clés (distribution primaire dans le schéma) la possibilité de distribuer l'autotest de dépistage du VIH à leurs partenaires et/ou certains de leurs pairs qui ne fréquentent pas les associations communautaires et/ou leur client (distribution secondaire dans le schéma).

### **Stratégie avancée pour les HSH, travailleuses du sexe et usagères et usagers de drogue :**

Lors d'activités menées au sein des communautés (stratégie avancée/point d'entrée sur le schéma) comme les causeries, les groupes de parole, les événements récréatifs et socialisant, les points chauds .., les pairs éducateurs (dispensateurs dans le schéma) proposeront aux populations clés (distribution primaire dans le schéma) la possibilité de distribuer des kits d'ADVIH à leurs partenaires et/ou certains de leurs pairs qui ne fréquentent pas les associations communautaires et/ou leur client (distribution secondaire dans le schéma).

### **Modalités de dispensation pour les deux stratégies**

L'ADVIH ici vise principalement à offrir l'opportunité de réaliser l'ADVIH pour les partenaires et pairs qui ne fréquentent pas les associations communautaires et/ou les clients de la personne ciblée.

La personne relais (distribution primaire) sera ainsi utilisée pour la distribution de l'autotest de dépistage du VIH aux cibles secondaires mais s'il/elle ne désire pas se dépister dans un centre ou lors de l'activité en utilisant le dépistage classique (par confort ou pour des raisons de discrétion) se verra aussi offrir la possibilité d'avoir recours à l'ADVIH.

**Avant de clôturer la séquence, le formateur demande aux participants s'ils ont des questions et, le cas échéant, il répond.**

**Demander aux participants s'ils pensent être en mesure de reproduire cette séquence de formation et s'ils ont des questions par rapport à cet aspect.**

Le projet ATLAS est mis en œuvre en Côte d'Ivoire en partenariat avec le Ministère de la Santé et de l'Hygiène Publique et le Programme National de Lutte contre le Sida.

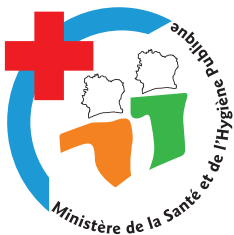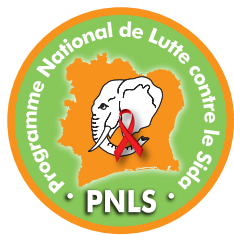

Ce document peut être utilisé ou reproduit sous réserve de mentionner la source, et uniquement pour un usage non commercial.

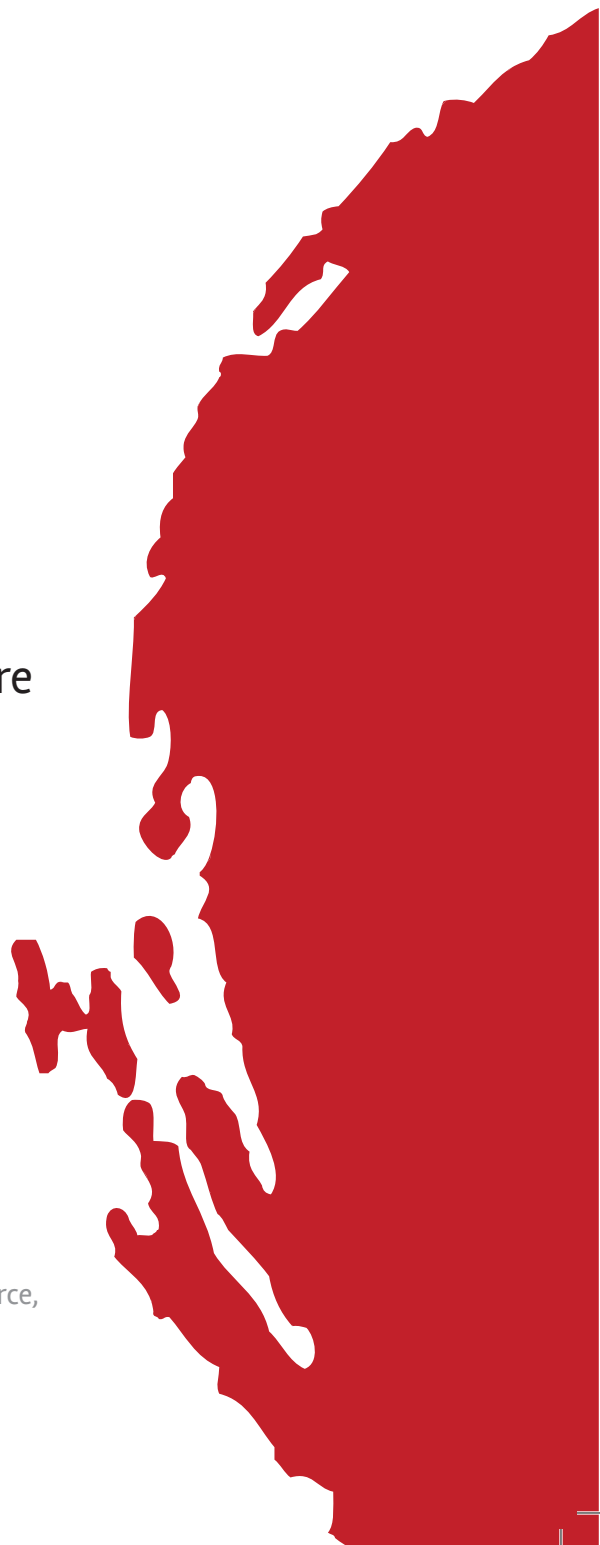

Supplement: 12879_2023_8625_MOESM2_ESM.pdf [file 12879_2023_8625_MOESM2_ESM.pdf]
