# Supplementary material for: Organisation of testing services, structural barriers and facilitators of routine HIV self-testing during sexually transmitted infection consultations: a qualitative study of patients and providers in Abidjan, Côte d’Ivoire
Source: PubMed Central journal article supplement (PMC10900544; doi:10.1186/s12879-023-08625-x), 2024-02-27

## Formation de formateurs

### Dispensation de l'autotest de dépistage du VIH dans le cadre du projet ATLAS en Côte d'Ivoire

Manuel du Formateur :  
Modules 2 – Présentation de l'ADVIH salivaire OraQuick®  
et des supports pour sa dispensation

# Sommaire

|                                                                                                                                                      |           |
|------------------------------------------------------------------------------------------------------------------------------------------------------|-----------|
| <b>MODULE 2 – PRESENTATION DE L’ADVIH ORAL ORAQUICK® ET DES SUPPORTS POUR SA DISPENSATION</b>                                                        | <b>2</b>  |
| a. Résumé du contenu du module 2                                                                                                                     | 2         |
| b. Fiche pédagogique du module 2                                                                                                                     | 3         |
| c. Référentiel technique du module 2                                                                                                                 | 6         |
| <b>Séquence n°1</b>                                                                                                                                  | <b>6</b>  |
| Les concepts clés liés au dépistage et applicables à l’ADVIH                                                                                         | 6         |
| <i>Sous-séquence 1.1 : Introduire les 5C</i>                                                                                                         | 6         |
| <i>Sous-séquence 1.2 : La stratégie de dépistage et les approches de dispensation de l’ADVIH</i>                                                     | 8         |
| <i>Sous-séquence 1.3 : Présenter les éléments d’information, de soutien et d’orientation de l’usagère et usager</i>                                  | 10        |
| <b>Séquence n°2</b>                                                                                                                                  | <b>12</b> |
| Les différents supports disponibles pour la dispensation et la réalisation de l’ADVIH par l’usagère et l’usager dans le cadre du projet ATLAS        | 12        |
| <i>Sous-séquence 2.1 : Présenter l’importance d’un dispensateur de qualité</i>                                                                       | 12        |
| <i>Sous-séquence 2.2 : Présenter le support « Notice »</i>                                                                                           | 13        |
| <i>Sous-séquence 2.3 : Présenter le support « Vidéo »</i>                                                                                            | 14        |
| <i>Sous-séquence 2.4 : Présenter le support « Brochure complémentaire »</i>                                                                          | 14        |
| <i>Sous-séquence 2.5 : Présenter le support « ligne téléphonique nationale »</i>                                                                     | 15        |
| <i>Sous-séquence 2.6 : Présenter le support « Site internet »</i>                                                                                    | 15        |
| <b>Séquence n°3</b>                                                                                                                                  | <b>16</b> |
| La réalisation de l’ADVIH et l’interprétation des résultats : questions fréquentes, mise en pratique et messages clés                                | 16        |
| <i>Sous-séquence 3.1 : Connaître les questions fréquentes</i>                                                                                        | 16        |
| <i>Sous-séquence 3.2 : Manipuler l’autotest de dépistage VIH</i>                                                                                     | 16        |
| <i>Sous-séquence 3.3 : Présenter les erreurs observées lors de l’utilisation de l’autotest de dépistage du VIH OraQuick et comment les minimiser</i> | 18        |
| <i>Sous-séquence 3.4 : Connaître les messages clés pour la dispensation</i>                                                                          | 18        |

a. Résumé du contenu du module 2

**Durée :** ½ journée (4 heures, pauses incluses)

**Objectifs**

**pédagogiques :** A l'issue de ce module les participants seront capables :

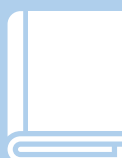

**Savoir :**

- D'expliquer les avantages, la stratégie de dépistage et les approches de dispensation de l'ADVIH.
- D'expliquer les concepts clés de dépistages et les supports disponibles.
- D'identifier les messages clés, les questions fréquentes et leurs réponses autour de l'ADVIH.
- De reproduire le dispositif global de formation en cascade au regard de la stratégie ATLAS.

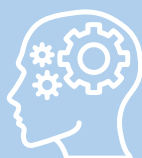

**Savoir-faire :**

- D'utiliser un kit d'ADVIH et en faire la démonstration.
- D'interpréter les résultats et orienter les personnes vers les services adaptés.
- De dispenser des kits d'ADVIH aux usagers et usagères avec les différents supports disponibles.

**Méthodologie :** Exposé et exercices pratique

**Le module est divisé en 3 séquences et 13 sous-séquences :**

1. Les concepts clés liés au dépistage et applicables à l'ADVIH
  - 1.1 Introduire les 5C
  - 1.2 La stratégie de dépistage et les approches de dispensation de l'ADVIH
  - 1.3 Présenter les éléments d'information, de soutien et d'orientation de l'utilisateur
2. Les différents supports disponibles pour la dispensation et réalisation de l'ADVIH par l'utilisateur dans le cadre du projet ATLAS
  - 2.1 Présenter l'importance d'un dispensateur de qualité
  - 2.2 Présenter le support « Notice »
  - 2.3 Présenter le support « Vidéo »
  - 2.4 Présenter le support « Brochure complémentaire »
  - 2.5 Présenter le support « Ligne téléphonique nationale »
  - 2.6 Présenter le support « Site internet »
3. La réalisation de l'ADVIH et l'interprétation des résultats : questions fréquentes, mise en pratique et messages clés
  - 3.1 Connaître les questions et réponses fréquentes
  - 3.2 Manipuler l'autotest de dépistage VIH
  - 3.3 Présenter les erreurs observées lors de l'utilisation de l'autotest du dépistage du VIH OraQuick® et comment les minimiser
  - 3.4 Connaître les messages clés pour la dispensation

b. Fiche pédagogique du module 2

JOUR 1 – après-midi

| Horaire | Séquence                                                                                                                           | Objectifs                                                                          | Temps | Méthode                                                                                                                                                                                                                                                                                           | Support                                    | Observations                                                                            |
|---------|------------------------------------------------------------------------------------------------------------------------------------|------------------------------------------------------------------------------------|-------|---------------------------------------------------------------------------------------------------------------------------------------------------------------------------------------------------------------------------------------------------------------------------------------------------|--------------------------------------------|-----------------------------------------------------------------------------------------|
| 13H30   | Les concepts clés liés au dépistage et applicables à l'ADVIH                                                                       | Introduire les 5C                                                                  | 10mn  | Le formateur demande aux participants s'ils savent ce que signifient les 5C.<br>Le formateur note les réponses et apporte les compléments, en soulignant l'importance du consentement et de la non-coercition.                                                                                    | Flipchart + feutre<br>PPT<br>(diapo 3 à 5) |                                                                                         |
|         |                                                                                                                                    | Décrire la stratégie de dépistage et les approches de dispensation de kits l'ADVIH | 15mn  | Le formateur demande aux participants de se rappeler les avantages de l'ADVIH (cf. session de la veille)<br>Le formateur présente :<br>- La stratégie de dépistage de l'ADVIH (notion de triage)<br>- Les approches de réalisation de l'ADVIH : avec ou sans assistance                           | Flipchart + feutre<br>PPT<br>(diapo 6 à 8) |                                                                                         |
| 14H15   | Les différents supports disponibles pour la dispensation et réalisation de l'ADVIH par l'utilisateur dans le cadre du projet ATLAS | Présenter les éléments d'information, de soutien et d'orientation de l'utilisateur | 15mn  | Le formateur présente les éléments relatifs à la particularité de l'ADVIH en matière : d'information, de soutien et d'orientation à l'utilisateur et l'usager                                                                                                                                     | PPT<br>(diapo 9 à 10)                      |                                                                                         |
|         |                                                                                                                                    | Valider l'atteinte des objectifs de la séquence                                    | 5mn   | Avant de passer à la prochaine séquence, demander aux participants s'ils ont des questions et y répondre.<br>Demander aux participants s'ils pensent être en mesure de reproduire cette séquence de formation et s'ils ont des questions par rapport à cet aspect.                                | -                                          |                                                                                         |
|         |                                                                                                                                    | Présenter l'importance d'un dispensateur de qualité                                | 5mn   | Le formateur explique que la qualité de la dispensation de kits d'ADVIH dépend essentiellement du dispensateur. Celui-ci doit/peut s'appuyer sur les différents outils qui suivent.<br>Rappeler l'importance du lien entre dispensateur et le distributeur relai pour la distribution secondaire. | PPT<br>(diapo 12)<br>dispensateur          |                                                                                         |
|         |                                                                                                                                    | Présenter le support Notice                                                        | 10mn  | Le formateur présente le support notice, en expliquant qu'il sera intégré au kit dispensé.<br>Distribution aux participants d'une version papier de la notice.                                                                                                                                    | PPT<br>(diapo 13)<br>Support notice        | Le formateur peut éventuellement projeter le support notice pour présenter son contenu. |
|         |                                                                                                                                    | Présenter le support Vidéo                                                         | 5mn   | Le formateur explique comment le support vidéo va être utilisé.<br>Expliquer la forte plus-value du support vidéo.<br>Projection de la vidéo.                                                                                                                                                     | PPT<br>(diapo 14)<br>Support vidéo         |                                                                                         |

| Horaire | Séquence                                                                                                                                  | Objectifs                                                | Temps | Méthode                                                                                                                                                                                                                                                                                                                                                                                                                                                                                                               | Support                                                | Observations                                                                                                             |
|---------|-------------------------------------------------------------------------------------------------------------------------------------------|----------------------------------------------------------|-------|-----------------------------------------------------------------------------------------------------------------------------------------------------------------------------------------------------------------------------------------------------------------------------------------------------------------------------------------------------------------------------------------------------------------------------------------------------------------------------------------------------------------------|--------------------------------------------------------|--------------------------------------------------------------------------------------------------------------------------|
| 14H15   | Les différents supports disponibles pour la dispensation et réalisation de l'ADVIH par l'usager et l'usager dans le cadre du projet ATLAS | Présenter le support Brochure complémentaire             | 10mn  | Le formateur présente le support brochure complémentaire, en expliquant qu'il sera intégré au kit dispensé. Distribution aux participants d'une version papier de la brochure complémentaire.                                                                                                                                                                                                                                                                                                                         | PPT (diapo 15)<br>Support brochure complémentaire      | Le formateur peut éventuellement projeter le support brochure complémentaire pour présenter son contenu.                 |
|         |                                                                                                                                           | Présenter le support <u>ligne téléphonique nationale</u> | 5mn   | Le formateur explique comment le support hotline va être utilisé, en appui spécifique à l'ADVIH. Distribution aux participants d'une version papier présentant la hotline.                                                                                                                                                                                                                                                                                                                                            | PPT (diapo 16)                                         |                                                                                                                          |
|         |                                                                                                                                           | Présenter le support <u>Site internet</u>                | 5mn   | Le formateur explique brièvement les situations potentielles d'utilisation du support site internet. Présentation du site internet et de ses principales fonctionnalités.                                                                                                                                                                                                                                                                                                                                             | Site internet                                          |                                                                                                                          |
|         |                                                                                                                                           | Valider l'atteinte des objectifs de la séquence          | 5mn   | Avant de passer à la prochaine séquence, demander aux participants s'ils ont des questions et y répondre. Demander aux participants s'ils pensent être en mesure de reproduire cette séquence de formation et s'ils ont des questions par rapport à cet aspect.                                                                                                                                                                                                                                                       | -                                                      |                                                                                                                          |
| 15H00   | PAUSE CAFE (30 MN)                                                                                                                        |                                                          |       |                                                                                                                                                                                                                                                                                                                                                                                                                                                                                                                       |                                                        |                                                                                                                          |
| 15H30   | La réalisation de l'ADVIH et l'interprétation des résultats : questions fréquentes, mise en pratique et messages clés                     | Connaître les questions fréquentes et leurs réponses     | 20mn  | Le formateur projette une liste de questions (les questions fréquentes).<br>Le formateur adresse les questions une par une, les participants – en se référant aux supports notice et brochures complémentaires – répondent aux questions. Le formateur corrige et valide les réponses en projetant la réponse correspondant à la question fréquente.<br>Le formateur conclut l'exercice en distribuant la fiche n°1 (Fiche pratique – Q&R fréquentes) présentant les questions fréquentes et les réponses à apporter. | PPT (diapo 18 à 22)<br>Fiche pratique – Q&R fréquentes | En fonction du niveau des participants à la formation, si nécessaire, rappeler les éléments clés de la transmission VIH. |
|         |                                                                                                                                           |                                                          |       |                                                                                                                                                                                                                                                                                                                                                                                                                                                                                                                       |                                                        |                                                                                                                          |

| Horaire | Séquence                                                                                                              | Objectifs                                                                                                     | Temps | Méthode                                                                                                                                                                                                                                                                                                                                                                                                                                                                                                                                                           | Support                                                                         | Observations |
|---------|-----------------------------------------------------------------------------------------------------------------------|---------------------------------------------------------------------------------------------------------------|-------|-------------------------------------------------------------------------------------------------------------------------------------------------------------------------------------------------------------------------------------------------------------------------------------------------------------------------------------------------------------------------------------------------------------------------------------------------------------------------------------------------------------------------------------------------------------------|---------------------------------------------------------------------------------|--------------|
| 15H30   | La réalisation de l'ADVIH et l'interprétation des résultats : questions fréquentes, mise en pratique et messages clés | Manipuler l'autotest de dépistage du VIH                                                                      | 15mn  | Les participants se réunissent en groupe de 3 ou 4 personnes et procèdent à une manipulation de l'autotest (cf ppt diapo 23) – en même temps ou à tour de rôle – en se référant aux supports Notice, Brochure complémentaire et Vidéo pour comprendre son utilisation.                                                                                                                                                                                                                                                                                            | PPT (diapo 23 à 26)<br>Kit ADVIH<br>Support Jeu<br>Interprétation des résultats |              |
|         |                                                                                                                       | Présenter les erreurs observées lors de l'utilisation de l'autotest du VIH OraQuick® et comment les minimiser | 15mn  | Le formateur distribue un document (Support Jeu interprétation des résultats) présentant différents résultats suite à l'administration de l'autotest de dépistage du VIH. Toujours en groupe, les participants discutent des différents résultats et proposent une interprétation et une conduite à tenir en fonction de leur compréhension et toujours en se référant aux différents supports : Notice, Brochure et Vidéo. Le formateur confirme l'interprétation des différents groupes et apporte des corrections si nécessaire (voir diapo 24 à 26)           | Support<br>Notice<br>Support<br>Brochure<br>comp.<br>Support<br>Vidéo           |              |
| 17H00   |                                                                                                                       | Connaître les messages clés à utiliser pour la dispensation                                                   | 10mn  | Le formateur demande aux participants ce qu'ils pensent de l'autotest oral OraQuick après l'avoir manipulé et procède à une synthèse des réactions des participants en soulignant les erreurs qu'ils auraient pu commettre. Le formateur présente ensuite une série d'erreurs régulièrement observées lors de l'utilisation de kits d'ADVIH. Le formateur commente chaque erreur en faisant le lien avec les réponses apportées précédemment aux questions fréquentes et à l'expérience des participants lors de l'utilisation de l'autotest de dépistage du VIH. | PPT (diapo 27)                                                                  |              |
|         |                                                                                                                       | Valider l'atteinte des objectifs de la séquence et du module                                                  | 25mn  | Le formateur distribue la fiche n°2 (Fiche pratique – Messages Clés) résumant l'ensemble des messages clés. Le formateur les commente avec les participants en faisant le lien avec les supports vu précédemment. Avant de clôturer le module, demander aux participants s'ils ont des questions et y répondre. Demander aux participants s'ils pensent être en mesure de reproduire cette séquence de formation et s'ils ont des questions par rapport à cet aspect.                                                                                             | Fiche pratique – Messages clés                                                  |              |
|         |                                                                                                                       |                                                                                                               | 5mn   |                                                                                                                                                                                                                                                                                                                                                                                                                                                                                                                                                                   | -                                                                               |              |
|         |                                                                                                                       |                                                                                                               |       |                                                                                                                                                                                                                                                                                                                                                                                                                                                                                                                                                                   |                                                                                 | FIN          |

### c. Référentiel technique du module 2

|                               |                                                                                                                                                                                                                                                                                                           |
|-------------------------------|-----------------------------------------------------------------------------------------------------------------------------------------------------------------------------------------------------------------------------------------------------------------------------------------------------------|
| <b>Séquence n°1</b>           | Les concepts clés liés au dépistage et applicables à l'ADVIH                                                                                                                                                                                                                                              |
| <b>Objectifs pédagogiques</b> | A la fin de cette séquence, les participants auront : <ul style="list-style-type: none"><li>- Compris le principe des 5C</li><li>- Compris le but et l'esprit de l'ADVIH et le lien avec les soins</li><li>- Compris les preuves globales sur l'efficacité, la fiabilité et la sécurité</li></ul>         |
| <b>Durée</b>                  | 45 minutes maximum                                                                                                                                                                                                                                                                                        |
| <b>Matériel</b>               | Pour réaliser cette séquence, le formateur aura besoin : <ul style="list-style-type: none"><li>- Du support de présentation PPT</li><li>- D'un kit de projection (ordinateur, vidéoprojecteur, écran)</li><li>- D'un flipchart et de feutres de différentes couleurs (noir, rouge, bleu, vert),</li></ul> |

#### ***Sous-séquence 1.1 : Introduire les 5C***

**Durée :** 10 minutes

**Méthode :** En s'appuyant sur le référentiel technique mise à disposition et le flipchart :

- Le formateur demande aux participants s'ils savent ce que signifient les 5C ;
- Le formateur note les réponses et apporte les compléments, en soulignant l'importance du consentement et de la non-coercition ;
- Le formateur revient à la présentation Power Point (PPT) est présente le résumé visuel des 5C.

#### **Référentiel technique :**

Il est important que les services de dépistage du VIH soient dispensés selon une approche axée sur la santé publique et le respect des droits de la personne en mettant l'accent sur certains domaines prioritaires, notamment la couverture sanitaire universelle, l'équité hommes-femmes et les droits fondamentaux liés à la santé, tels que l'accessibilité, la disponibilité, l'acceptabilité et la qualité des services. **Pour tous les services de dépistage du VIH, quelle que soit l'approche adoptée, les avantages offerts en termes de santé publique doivent toujours l'emporter sur les risques ou les préjudices potentiels.** En outre, le dépistage du VIH doit toujours avoir un objectif double : profiter individuellement aux personnes testées et améliorer les résultats sanitaires au niveau de la population.

Le renforcement des services de dépistage du VIH s'impose, non seulement pour obtenir un taux élevé de recours au dépistage ou atteindre les cibles fixées en la matière, mais avant tout pour garantir l'accès de toutes les personnes qui en ont besoin à un dépistage approprié et de qualité, en liaison avec les services de prévention, de traitement et de soins. **Le dépistage du VIH à des fins de diagnostic doit toujours être réalisé à titre volontaire et le consentement donné par le patient doit reposer sur des informations qui lui sont fournies avant le test.** Tous les services de dépistage du VIH, y compris l'auto dépistage, doivent respecter les « 5 C » définis par l'OMS : **Consentement, Confidentialité, Conseil, résultats Corrects et Connexion** (liaison avec les services de prévention, de soins et de traitement). **Un dépistage obligatoire ou coercitif n'est jamais approprié**, que la contrainte soit le fait d'un prestataire de soins, d'un partenaire, d'un membre de la famille ou de toute autre personne.

Les « 5 C » sont des principes qui s'appliquent à tous les services de dépistage du VIH, en toutes circonstances. Ces principes sont les suivants :

|   |                                     |                                                                                                                                                                                                                                                                                                                                                                                                                                                                                                                                                                                                                                                                                                                                                                                                                                                                                                                                                                                                                                                                                                                                                                |
|---|-------------------------------------|----------------------------------------------------------------------------------------------------------------------------------------------------------------------------------------------------------------------------------------------------------------------------------------------------------------------------------------------------------------------------------------------------------------------------------------------------------------------------------------------------------------------------------------------------------------------------------------------------------------------------------------------------------------------------------------------------------------------------------------------------------------------------------------------------------------------------------------------------------------------------------------------------------------------------------------------------------------------------------------------------------------------------------------------------------------------------------------------------------------------------------------------------------------|
| 1 | <b>Consentement</b>                 | <p>Pour qu'un conseil et qu'un dépistage du VIH soient réalisés, les personnes qui en bénéficient doivent donner leur consentement éclairé (ce consentement peut être signifié verbalement et n'a pas besoin de se présenter sous forme écrite). Elles doivent être informées du processus suivi pour ce conseil et ce dépistage, ainsi que de leur droit à refuser le test. Lorsqu'une personne demande à bénéficier d'un autotest de dépistage du VIH ou signale qu'elle en a utilisé un, il ne faut en aucun cas présumer qu'elle donne par là-même son consentement ou qu'elle l'a implicitement donné. Il est important d'informer les personnes effectuant un ADVIH que le dépistage obligatoire ou coercitif n'est jamais justifié.</p> <p>Le consentement éclairé est indispensable lorsque les programmes adoptent des approches d'autotest assisté du VIH. En outre, il est essentiel d'informer les personnes vivant avec le VIH que la notification assistée aux partenaires est un service fondé sur la participation volontaire et d'expliquer aux partenaires de patients séropositifs que le dépistage est volontaire, et non obligatoire.</p> |
| 2 | <b>Confidentialité</b>              | <p>Le dépistage du VIH doit être confidentiel, ce qui signifie que la teneur des discussions entre le prestataire du dépistage et la personne testée ne sera pas divulguée à un tiers sans que la personne ayant bénéficié du dépistage ne donne son consentement explicite. Si la confidentialité doit bien être respectée, il ne faut cependant jamais qu'elle alimente un climat de secret, de stigmatisation et de honte. Entre autres questions, les conseillers doivent toujours demander à leurs clients quelles sont les personnes qu'ils souhaitent informer et comment ils voudraient que cette information soit communiquée. Le partage de la confidentialité avec un partenaire ou des membres de la famille (c'est-à-dire avec des personnes de confiance), ainsi qu'avec les prestataires de soins, est souvent très bénéfique pour les patients séropositifs pour le VIH.</p>                                                                                                                                                                                                                                                                   |
| 3 | <b>Conseil</b>                      | <p>Les services d'information avant le test et de conseil après le test peuvent être dispensés dans le cadre d'un groupe, si la situation s'y prête ; cependant, toutes les personnes doivent avoir la possibilité de poser des questions en privé si elles le souhaitent. Lors de tout dépistage du VIH, la personne testée doit bénéficier de conseils de qualité après le test, adaptés aux résultats obtenus. Des mécanismes d'assurance de la qualité, ainsi que des systèmes d'appui à la supervision et à l'encadrement, doivent être en place pour garantir un conseil de qualité.</p>                                                                                                                                                                                                                                                                                                                                                                                                                                                                                                                                                                 |
| 4 | <b>Résultats corrects des tests</b> | <p>Les prestataires des tests de dépistage du VIH doivent s'attacher à fournir des services de dépistage de qualité et à employer des mécanismes d'assurance de la qualité pour garantir l'exactitude du diagnostic obtenu. L'assurance de la qualité peut s'appuyer à la fois sur des mesures internes et externes et doit bénéficier d'un soutien de la part du laboratoire national de référence.</p>                                                                                                                                                                                                                                                                                                                                                                                                                                                                                                                                                                                                                                                                                                                                                       |
| 5 | <b>Connexion</b>                    | <p>La liaison avec les services de prévention, de traitement et de soins doit inclure la prestation d'un suivi efficace et approprié. Lorsque l'accès aux soins, y compris aux traitements antirétroviraux, est inexistant ou lorsque la liaison avec ces services est inadéquate, le dépistage du VIH présente peu d'avantages pour les personnes séropositives.</p> <p>Dans le cadre de l'auto dépistage du VIH, ce principe de connexion comprend également la liaison avec des services de dépistage permettant de réaliser un nouveau test dans un contexte exempt de stigmatisation, au niveau communautaire ou dans un établissement de soins, où les résultats du dépistage peuvent être confirmés et un diagnostic posé par un prestataire formé.</p>                                                                                                                                                                                                                                                                                                                                                                                                 |

### Messages clés pour le formateur :

- Le dépistage du VIH doit toujours être réalisé à titre volontaire, confidentiel et gratuit.
- Tous les services de dépistage du VIH, y compris l'auto dépistage, doivent respecter les « 5 C » définis par l'OMS : Consentement, Confidentialité, Conseil, résultats Corrects et Connexion.
- Il est important d'informer les personnes effectuant un autotest de dépistage du VIH que le dépistage obligatoire ou coercitif n'est jamais justifié.



## Sous-séquence 1.2 : La stratégie de dépistage et les approches de dispensation de l'ADVIH

**Durée :** 15 minutes

**Méthode :** En s'appuyant sur le référentiel technique mise à disposition et le flipchart :

- Le formateur demande aux participants de se rappeler les avantages de l'ADVIH (cf. session de la veille)

En s'appuyant sur la présentation Power Point (PPT), le formateur présente :

- La stratégie de dépistage de l'ADVIH (notion de triage) ;
- Les approches de réalisation de l'ADVIH : avec ou sans assistance.

### **Référentiel technique :**

L'auto dépistage du VIH est un processus par lequel la personne prélève elle-même l'échantillon (fluide oral), effectue le test pour le VIH, puis interprète son résultat, souvent dans un cadre privé, seule ou avec une personne de confiance.

### **La stratégie de dépistage de l'autotest de dépistage du VIH**

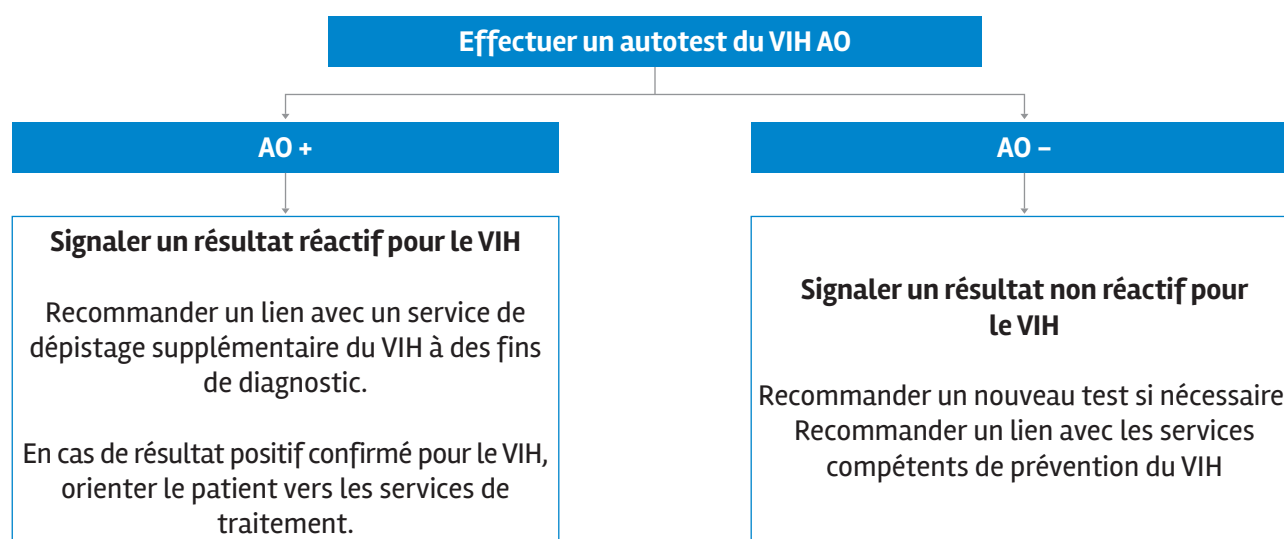

AO = Epreuve O (« Assay O », test à des fins de triage)

Les autotests de dépistage du VIH ne délivrent pas de diagnostic définitif de séropositivité au VIH. En effet, comme c'est le cas pour tous les tests de dépistage du VIH, un test rapide à orientation diagnostique (TROD) unique ne suffit pas à établir un diagnostic d'infection à VIH. Ainsi, l'autotest de dépistage du VIH est considéré comme un test à des fins de triage, ce qui implique que les personnes ayant obtenu un résultat réactif doivent faire l'objet de tests supplémentaires, réalisés par un prestataire formé selon une stratégie de dépistage validée sur le plan national (voir figure ci-dessus).

L'interprétation d'un résultat non réactif dépendra du risque existant d'exposition au VIH. On encouragera les personnes qui sont exposées à un risque élevé persistant, ou dont le test a été réalisé dans les 6 à 12 semaines suivant une exposition potentielle au VIH, à se soumettre à un nouveau test. L'autotest de dépistage du VIH est déconseillé aux personnes dont le statut au regard du VIH est connu et qui prennent des antirétroviraux, car elles pourraient obtenir des résultats incorrects (faux négatif).

### **Approches de l'autotest de dépistage du VIH avec assistance directe ou sans assistance**

Dans le contexte de l'auto dépistage, il est important de noter que bien souvent les conseils avant et après le dépistage suivant les 5C (voir ci-dessus) ne sont pas possibles puisque le principe même de l'ADVIH est de faire le dépistage chez soi, en toute discrétion.

On différencie alors les services d'**information avant le test** et de **conseil après le test** selon deux modèles : L'autotest de dépistage du VIH avec assistance et sans assistance

L'autotest de dépistage du VIH avec assistance directe se rapporte aux situations où la personne bénéficie, avant ou pendant le test, d'une démonstration en personne réalisée par un prestataire formé ou un pair, lui montrant comment effectuer le test et comment en interpréter les résultats.

L'autotest de dépistage du VIH sans assistance se rapporte aux situations où la personne réalise le test uniquement à l'aide d'un kit d'autotest de dépistage accompagné d'une notice d'utilisation du fabricant d'une brochure complémentaire, d'une vidéo.

**Les approches d'autotest de dépistage du VIH avec assistance directe et sans assistance peuvent toutes deux inclure des outils complémentaires** (permanences téléphoniques, messages SMS, vidéos, médias sociaux et applications sur internet), fournissant à la personne un appui technique, des conseils et une orientation vers un dépistage supplémentaire ou vers d'autres services, notamment les services de prévention, de soins et de traitement de l'infection à VIH.

## Outils d'aide à l'auto dépistage du VIH avec assistance directe ou sans assistance

| Outils d'aide                                                                                                                                                                                                                                                                                      | Assistance directe | Sans assistance |
|----------------------------------------------------------------------------------------------------------------------------------------------------------------------------------------------------------------------------------------------------------------------------------------------------|--------------------|-----------------|
| Séance d'information en personne, démonstration individuelle ou en groupe illustrant la bonne manière d'utiliser le kit et d'interpréter les résultats                                                                                                                                             | X                  |                 |
| Démonstrations visuelles ou via les médias sociaux sur internet illustrant la bonne manière d'utiliser le kit et d'interpréter les résultats                                                                                                                                                       | X                  | X               |
| Assistance en personne pendant la réalisation du test                                                                                                                                                                                                                                              | X                  |                 |
| Instructions d'utilisation :<br>– Illustrations/texte<br>– Brochures ou dépliants contenant des informations sur les services locaux de dépistage et de traitement de l'infection à VIH et leurs coordonnées : dispensaire, permanence téléphonique, etc.<br>– Instructions sur support multimédia | X                  | X               |
| Aide à distance par téléphone, médias sociaux, SMS, codes QR, applications de messagerie sur internet ou sur téléphone mobile                                                                                                                                                                      | X                  | X               |

### ***Sous-séquence 1.3 : Présenter les éléments d'information, de soutien et d'orientation de l'utilisateur et usager***

**Durée :** 15 minutes

**Méthode :** En s'appuyant sur la présentation Power Point (PPT) mise à disposition :

- Le formateur présente les éléments relatifs à la particularité de l'ADVIH en matière : d'information, de soutien et d'orientation à l'utilisateur.

#### **Référentiel technique :**

Quelle que soit l'approche retenue, il faut fournir aux personnes qui se dépistent elles-mêmes des informations claires sur la façon d'effectuer le test, d'interpréter correctement le résultat, ainsi qu'où et comment elles peuvent accéder aux services de prévention, de traitement, de soins et de soutien en matière de VIH. En particulier, elles doivent absolument prendre conscience des aspects suivants :

- **Un résultat réactif n'est pas un diagnostic positif pour le VIH et doit être confirmé avec dépistage supplémentaire.** Si le résultat est confirmé, il faut expliquer à la personne concernée où et comment elle peut accéder au traitement et aux soins ;
- **Un résultat non réactif est supposé négatif.** Les personnes qui sont exposés à un risque élevé ou constant de VIH, ou qui pourraient avoir été exposés au VIH dans les 12 semaines qui précèdent, devraient se faire dépister à nouveau et être orientées vers un service de prévention du VIH adapté (ex : prophylaxie post exposition ou préexposition, circoncision médicale volontaire) ;
- **Un résultat non valide (interprétation impossible) nécessite de recommencer le test à nouveau** soit avec un nouveau kit d'ADVIH, soit en se rendant au centre de dépistage.

Quand cela est possible, le suivi du recours à l'ADVIH dans la population cible, de la positivité au VIH et de la liaison aux services est important pour évaluer l'efficacité de l'ADVIH et pour signaler et corriger les éventuels préjudices sociaux.

Cependant, le principe même de l'ADVIH visant à offrir l'opportunité à chacune et chacun de faire le test chez soi en toute discrétion ne permet pas au prestataire, sauf dans le cas de dispensation assistée de suivre directement l'utilisation et le résultat du test.

Différentes stratégies et outils (parfois communs aux outils d'aide à la réalisation de l'ADVIH) de mise en relation avec les services de dépistage et de soins après un autotest de dépistage du VIH sont possibles, même en cas de dispensation non assistée et/ou secondaire :

- **Suivi proactif à base communautaire assuré par des pairs et/ou des agents à portée communautaire** (en personne ou par téléphone/SMS/plateformes de messagerie à caractère social). Quand des agents communautaires formés sont responsables de la dispensation des kits d'autotest de dépistage du VIH, ces agents peuvent proposer un suivi et des conseils supplémentaires après l'auto dépistage, ainsi qu'une assistance et/ou un accompagnement vers les services chargés de réaliser les tests de confirmation.
- **Distribution de brochures et de dépliants avec les kits d'ADVIH**, contenant des informations sur les services de dépistage du VIH et les services de prévention, de traitement et de soins de l'infection à VIH, ainsi que des informations sur d'autres maladies comme la tuberculose, les infections bactériennes sexuellement transmissibles et l'hépatite virale.
- **Permanences téléphoniques que les personnes appellent avant ou après la réalisation du test** pour bénéficier d'une aide psychosociale et/ou technique qui peuvent également fournir des contacts et des liens vers les services de dépistage VIH et d'autres services pour le VIH, ainsi que vers des services non médicaux comme des programmes d'aide juridique ou d'aide aux victimes de violences.
- **Programmes et applications sur Internet/vidéos pour fournir des informations** afin de se mettre en relation avec les services pertinents d'une multitude de façons. Certaines approches utilisées à ce jour comprennent des services et des programmes de conseil en direct, en ligne via des échanges de messages, des conseils sous forme audio ou vidéo et des programmes qui proposent des instructions étape par étape sur ce qu'il faut faire quand on a obtenu un résultat réactif.

### Messages clés pour le formateur

- Les autotests de dépistage du VIH ne délivrent pas de diagnostic définitif. C'est un test rapide à orientation diagnostique (TROD) à des fins de triage, ce qui implique que les personnes ayant obtenu un résultat réactif doivent faire l'objet de tests supplémentaires, réalisés par un prestataire formé selon une stratégie de dépistage validée sur le plan national.
- L'autotest de dépistage du VIH peut être réalisé avec assistance directe (humaine) ou sans assistance. Des stratégies complémentaires (ligne téléphonique gratuite, vidéo de démonstration, site internet, brochures d'information) permettent d'accompagner la personne dans les deux cas.
- L'information, le soutien et l'orientation sont essentiels afin que l'utilisateur et l'utilisateur soit référé vers les services adaptés en fonction du résultat obtenu, particulièrement lorsqu'il est réactif afin qu'il confirme son statut et puisse avoir accès aux soins le cas échéant.

**Avant de clôturer la séquence, le formateur demande aux participants s'ils ont des questions et, le cas échéant, y répond.**

**Demander aux participants s'ils pensent être en mesure de reproduire cette séquence de formation et s'ils ont des questions par rapport à cet aspect.**

|                               |                                                                                                                                                                                                                                                                                                                                                                                                                                        |
|-------------------------------|----------------------------------------------------------------------------------------------------------------------------------------------------------------------------------------------------------------------------------------------------------------------------------------------------------------------------------------------------------------------------------------------------------------------------------------|
| <b>Séquence n°2</b>           | Les différents supports disponibles pour la dispensation et la réalisation de l'ADVIH par l'usagère et l'usager dans le cadre du projet ATLAS                                                                                                                                                                                                                                                                                          |
| <b>Objectifs pédagogiques</b> | A la fin de cette séquence, les participants auront :<br>- Compris l'importance d'un dispensateur de qualité<br>- Vu et compris comment utiliser le support « Notice »<br>- Vu et compris comment utiliser le support « Vidéo »<br>- Vu et compris comment utiliser le support « Brochure complémentaire »<br>- Vu et compris comment utiliser le support « Hotline »<br>- Vu et compris comment utiliser le support « Site internet » |
| <b>Durée</b>                  | 40 minutes maximum                                                                                                                                                                                                                                                                                                                                                                                                                     |
| <b>Matériel</b>               | Pour réaliser cette séquence, le formateur aura besoin :<br>- D'un kit de projection (ordinateur, vidéoprojecteur, écran)<br>- Des différents supports de dispensation de l'ADVIH                                                                                                                                                                                                                                                      |

### **Sous-séquence 2.1 : Présenter l'importance d'un dispensateur de qualité**

**Durée :** 5 minutes

**Méthode :** En s'appuyant sur le référentiel technique :

- Le formateur explique que la qualité de dispensation de l'ADVIH dépend essentiellement du dispensateur. Celui-ci doit/peut s'appuyer sur les différents outils qui suivent ;
- Rappeler l'importance du lien entre dispensateur et le distributeur relai pour la distribution secondaire.

**Référentiel technique :**

La qualité de la dispensation joue un rôle crucial afin de s'assurer que l'utilisateur qui, dans la grande majorité, effectuera son test sans assistance humaine :

- Sera en capacité de **réaliser** correctement l'autotest de dépistage du VIH ;
- Sera en capacité d'**interpréter** correctement son résultat ;
- Sera en capacité de comprendre qu'il est nécessaire de **se rendre dans un service adapté**.

Dans le cadre du projet ATLAS, le fait d'avoir deux niveaux de dispensation renforce cet enjeu. En effet le premier dispensateur (professionnel de santé/ pair éducateur) doit à la fois expliquer :

- **En distribution primaire** : à la personne à qui elle donne l'autotest de dépistage du VIH comment elle peut le réaliser correctement dans le cas où celle-ci l'utilisera chez elle et pour elle-même ;
- **Pour la distribution secondaire** : A cette même personne sur comment elle pourra elle-même dispenser l'autotest aux cibles secondaires du projet (partenaires, pairs, clients).

Au-delà des messages importants à transmettre par le dispensateur lors de la dispensation (que nous verrons plus tard) plusieurs outils ont été développés par le projet ATLAS afin d'aider l'utilisateur.

## Sous-séquence 2.2 : Présenter le support « Notice »

Durée : 10 minutes

Méthode : En s'appuyant sur le référentiel technique et le support mis à disposition :

- Le formateur présente le support notice, en expliquant qu'il sera intégré au kit dispensé ;
- Distribution aux participants d'une version papier de la notice.

Veillez à bien décortiquer le contenu de la notice, à en décrypter l'ensemble des informations en demandant aux participants s'ils en comprennent les différents éléments.

### Référentiel technique :

En français, la notice a été adaptée à chaque pays en insérant le numéro de la ligne gratuite national (voir plus bas) et testée auprès de 64 personnes dans les trois pays afin d'identifier les possibles améliorations qui sont intégrées dans la brochure complémentaire (voir plus loin).

### **Sous-séquence 2.3 : Présenter le support « Vidéo »**

**Durée :** 5 minutes

**Méthode :** En s'appuyant sur le référentiel technique et le support mis à disposition :

- Le formateur explique comment le support vidéo va être utilisé ;
- Expliquer la forte plus-value du support vidéo ;
- Projection de la vidéo.

**Référentiel technique :**

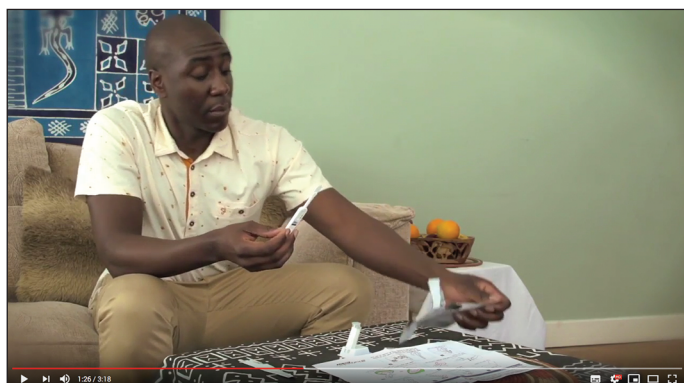

Disponible en 7 langues pour les 3 pays du projet ATLAS (français, wolof, bambara, dioula, peulh, soninké et baoulé). Elle est disponible en ligne (YouTube et site internet ATLAS).

[https://www.youtube.com/channel/UC80cfsQZdSflyB\\_tCy4qg6w](https://www.youtube.com/channel/UC80cfsQZdSflyB_tCy4qg6w)

Cette vidéo permet d'apporter les informations de manière simple et accessible notamment pour les personnes ne sachant pas lire.

Lors des tests effectués auprès des usagères et usagers, la plus-value de cette vidéo est reconnue de manière unanime. Une version compressée et plus complète (avec ligne téléphonique nationale notamment) sera développée avec l'objectif de pouvoir la partager via WhatsApp et les réseaux sociaux.

En attendant le lien YouTube est privilégié pour la partager.

### **Sous-séquence 2.4 : Présenter le support « Brochure complémentaire »**

**Durée :** 10 minutes

**Méthode :** En s'appuyant sur le référentiel technique et le support mis à disposition :

- Le formateur présente le support brochure complémentaire, en expliquant qu'il sera intégré au kit dispensé ;
- Distribution aux participants d'une version papier de la brochure complémentaire.

**Référentiel technique :**

Développée en concertation avec l'ensemble des partenaires dans chaque pays et après avoir testé la notice et la vidéo de démonstration auprès de 64 personnes dans les trois pays.

Elle permet de clarifier et compléter certains messages notamment pour les personnes illettrées :

- Promeut le recours à la vidéo et à la ligne gratuite nationale (voir ci-dessous) ;
- Rappelle les choses importantes à faire et ne pas faire ;
- Rappelle l'interprétation du résultat et la conduite à tenir ;
- Rappelle l'âge légal de dépistage dans chaque pays ;

- Propose une liste de services de référencement pour les usagères et usagers ;
- Permet la traçabilité du kit (canal de dispensation et partenaire) ;
- Permettrait d'inviter les personnes à participer à l'étude par téléphone (autocollant qui sera adjoint).

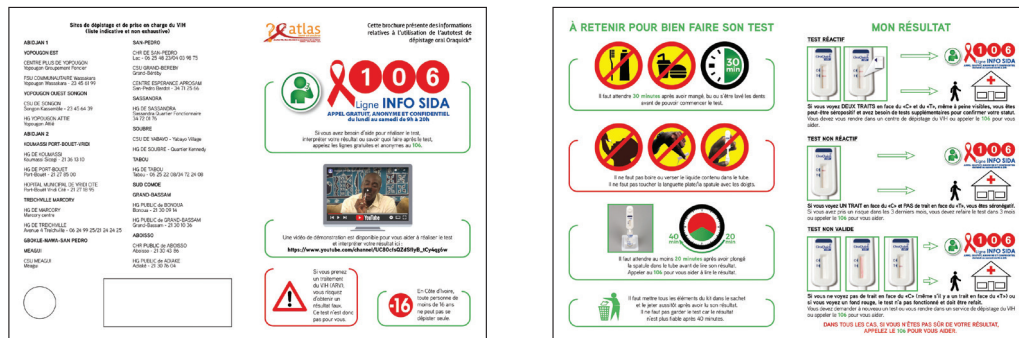

### Sous-séquence 2.5 : Présenter le support « ligne téléphonique nationale »

**Durée :** 5 minutes

**Méthode :** En s'appuyant sur le référentiel technique et le support mis à disposition :

- Le formateur explique comment le support hotline va être utilisé, en appui spécifique à l'ADVIH ;
- Distribution aux participants d'une version papier présentant la hotline du pays.

#### **Référentiel technique :**

Dans chaque pays, les écoutants des lignes téléphoniques nationales seront formés afin d'accompagner les usagères et usagers à la réalisation de l'autotest de dépistage du VIH, l'interprétation des résultats et le référencement vers les services adaptés (prévention, dépistage de confirmation et lien vers les soins) ou pour toute question relative au VIH de manière plus générale. Les appels sont gratuits et anonymes.

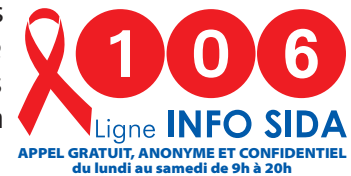

### Sous-séquence 2.6 : Présenter le support « Site internet »

**Durée :** 5 minutes

**Méthode :** En s'appuyant sur le référentiel technique et le support mis à disposition :

- Le formateur explique brièvement les situations potentielles d'utilisation du support site internet ;
- Présentation du site internet et de ses principales fonctionnalités.

#### **Référentiel technique :**

Ce site présente le projet ATLAS avec des informations sur l'ADVIH.

Plus particulièrement il intègre des pages spécifiques par pays intégrant des informations contextualisées pour l'usagère et l'utilisateur (lien vers outils, documents et sites ressources) et avec notamment la liste des services de référencement dans le pays.

<https://atlas.solthis.org/>

**Avant de clôturer la séquence, le formateur demande aux participants s'ils ont des questions et, le cas échéant, il répond.**  
**Demander aux participants s'ils pensent être en mesure de reproduire cette séquence de formation et s'ils ont des questions par rapport à cet aspect.**



|                               |                                                                                                                                                                                                                                                                                                                                                                                                                                                                                                                                                                                          |
|-------------------------------|------------------------------------------------------------------------------------------------------------------------------------------------------------------------------------------------------------------------------------------------------------------------------------------------------------------------------------------------------------------------------------------------------------------------------------------------------------------------------------------------------------------------------------------------------------------------------------------|
| <b>Séquence n°3</b>           | La réalisation de l'ADVIH et l'interprétation des résultats : questions fréquentes, mise en pratique et messages clés                                                                                                                                                                                                                                                                                                                                                                                                                                                                    |
| <b>Objectifs pédagogiques</b> | A la fin de cette séquence, les participants auront : <ul style="list-style-type: none"> <li>- Pris connaissance des questions fréquentes posées dans le cadre de la dispensation de l'autotest de dépistage du VIH</li> <li>- Manipulé l'autotest de dépistage du VIH</li> <li>- Pris connaissance des erreurs observées lors de l'utilisation de l'autotest de dépistage VIH OraQuick et compris comment les minimiser</li> <li>- Pris connaissance des messages clés à transmettre lors de la dispensation de l'autotest de dépistage du VIH</li> </ul>                               |
| <b>Durée</b>                  | 1 heure et 25 minutes maximum                                                                                                                                                                                                                                                                                                                                                                                                                                                                                                                                                            |
| <b>Matériel</b>               | Pour réaliser cette séquence, le formateur aura besoin : <ul style="list-style-type: none"> <li>- Du support de présentation PPT</li> <li>- D'un kit de projection (ordinateur, vidéoprojecteur, écran)</li> <li>- De la fiche « scénario d'interprétation »</li> <li>- De kits OraQuick (1 kit par groupe de 3 à 4 personnes)</li> <li>- De la fiche pratique – Q&amp;R fréquentes</li> <li>- Du support « Notice »</li> <li>- Du support « Brochure complémentaire »</li> <li>- Du support « Vidéo »</li> <li>- De la fiche pratique « Messages clés » pour la dispensation</li> </ul> |

### **Sous-séquence 3.1 : Connaître les questions fréquentes**

**Durée :** 20 minutes

**Méthode :** En s'appuyant sur la présentation Power Point (PPT) et de la fiche pratique Q&R fréquentes mise à disposition :

- Le formateur projette une liste de questions (les questions fréquentes) ;
- Le formateur adresse les questions une par une ; les participants, en se référant aux supports notice et brochures complémentaires, répondent aux questions ;
- Le formateur corrige et valide les réponses en projetant la réponse correspondant à la question fréquente ;
- Le formateur conclut l'exercice en distribuant la fiche n°1 (fiche pratique Q&R fréquentes) présentant les questions fréquentes et les réponses à apporter.

### **Sous-séquence 3.2 : Manipuler l'autotest de dépistage VIH**

**Durée :** 30 minutes

**Méthode :** En s'appuyant sur le support Power Point (PPT), le Kit d'ADVIH et les supports « Notice », « Brochure complémentaire » et « Vidéo » mis à disposition :

- Les participants se réunissent en groupe de 3 ou 4 personnes et procèdent à une manipulation de l'ADVIH – en même temps ou à tour de rôle – en se référant aux supports Notice, Brochure complémentaire et Vidéo pour comprendre son utilisation ;
- Le formateur distribue la fiche des différents scénarios d'interprétation présentant différents résultats suite à l'administration de l'ADVIH ;
- Toujours en groupe, les participants discutent des différents résultats et proposent une interprétation et une conduite à tenir en fonction de leur compréhension et toujours en se référant aux différents supports Notice et Brochure et Vidéo ;
- Le formateur confirme l'interprétation des différents groupes et apporte des corrections si nécessaire.

## Référentiel technique :

Manipuler l'autotest de dépistage du VIH permet :

- De mettre en action chaque participant ;
- De permettre à chacun de manipuler le kit ;
- D'utiliser des différents supports.

### Attention !! Il ne s'agit pas de faire faire le test en vrai

L'idée est de permettre à chacun de manipuler les différents composants du test et d'expérimenter le geste de collecte de matière gingivale. Vous pourrez donc proposer 1 kit par groupe et simuler la collecte orale avec un autre élément que la spatule pour des raisons évidentes d'hygiène (abaisse langue par exemple).

### Jeu de l'interprétation des résultats

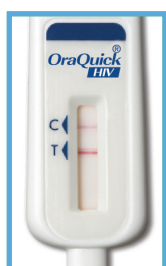

La présence de deux traits complets bien visibles signifie que le test est réactif.

La personne est peut-être séropositive.

Un test supplémentaire est nécessaire pour confirmer que la personne est séropositive.

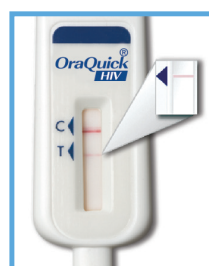

La présence de deux traits complets, même à peine visibles, signifie que le test est réactif.

La personne est peut-être séropositive.

Un test supplémentaire est nécessaire pour confirmer que la personne est séropositive.

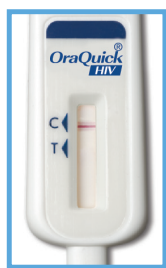

Un trait en face du « C » et pas de trait en face du « T » indique que le test n'est pas réactif.

La personne est séronégative.

S'il s'est écoulé moins de 3 mois depuis la dernière conduite à risque, il faut attendre que les 3 mois soient passés pour faire le test à nouveau.

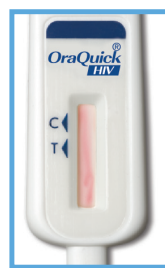

Un fond rouge qui obscurcit le test indique que le test ne marche pas et doit être refait.

La personne doit se procurer d'un autre autotest ou se rendre dans un centre de dépistage.

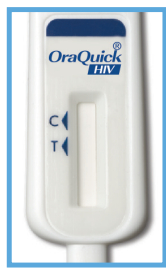

Pas de trait en face du « C » indique que le test ne marche pas et doit être refait.

La personne doit se procurer d'un autre autotest ou se rendre dans un centre de dépistage.

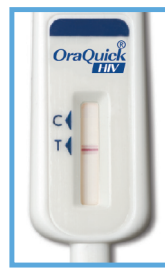

Pas de trait en face du « C » même avec un trait en face du « T » indique que le test ne marche pas et doit être refait.

La personne doit se procurer un autre autotest ou se rendre dans un centre de dépistage.

### **Sous-séquence 3.3 : Présenter les erreurs observées lors de l'utilisation de l'autotest de dépistage du VIH OraQuick et comment les minimiser**

**Durée :** 20 minutes

**Méthode :** En s'appuyant sur la présentation Power Point (PPT) mise à disposition :

- Le formateur demande aux participants ce qu'ils pensent de l'autotest de dépistage OraQuick après l'avoir manipulé et procède à une synthèse des réactions des participants en soulignant les erreurs qu'ils auraient pu commettre ;
- Le formateur présente ensuite une série d'erreurs régulièrement observées lors de l'utilisation de l'autotest de dépistage OraQuick ;
- Le formateur commente chaque erreur en faisant le lien avec les réponses apportées précédemment aux questions fréquentes et à l'expérience des participants lors de l'utilisation de l'autotest.

Le formateur encourage les échanges avec les participants afin de s'assurer que chacun ait bien compris le contenu de cette sous-séquence.

#### **Référentiel technique :**

Ces erreurs fréquemment observées lors de la réalisation de l'autotest oral OraQuick sont adressées dans les messages clés et les différents supports disponibles.

- La personne ne lit pas la notice pour réaliser l'ADVIH ;
- La personne veut boire ou renverser le liquide contenu dans le tube ;
- La personne veut utiliser le test comme une brosse à dent ou en posant juste la spatule sur la gencive ;
- La personne mange du chewing gum, boit au moment de faire le test ou dans les 15 minutes avant le test ;
- La personne ne lit pas ses résultats dans la période des 20 à 40 minutes préconisées ;
- Les personnes sous ARVs veulent se tester avec kits d'ADVIH ;
- La personne n'arrive pas à interpréter ses résultats correctement ;
- La personne ne sait pas quoi faire après avoir lu ses résultats.

**RAPPEL : La Notice, la brochure complémentaire, la Vidéo et la ligne téléphonique gratuite doivent être promus et utilisés par usagers pour les aider !!**

### **Sous-séquence 3.4 : Connaître les messages clés pour la dispensation**

**Durée :** 35 minutes

**Méthode :** En s'appuyant sur le support fiche pratique « Messages clés » mise à disposition :

- Le formateur distribue la fiche n°2 (fiche pratique – Messages Clés) résumant l'ensemble des messages clés pour la dispensation ;
- Le formateur les commente avec les participants en faisant le lien avec les supports vus précédemment.

**Avant de clôturer le module, le formateur demande aux participants s'ils ont des questions et, le cas échéant, il répond.**

**Demander aux participants s'ils pensent être en mesure de reproduire ce module de formation et s'ils ont des questions par rapport à cet aspect.**

Le projet ATLAS est mis en œuvre en Côte d'Ivoire en partenariat avec le Ministère de la Santé et de l'Hygiène Publique et le Programme National de Lutte contre le Sida.

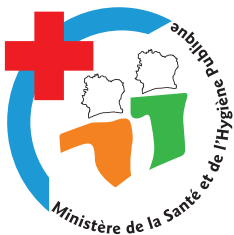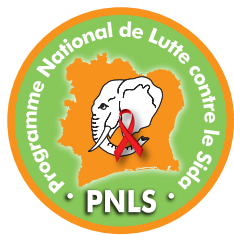

Ce document peut être utilisé ou reproduit sous réserve de mentionner la source, et uniquement pour un usage non commercial.

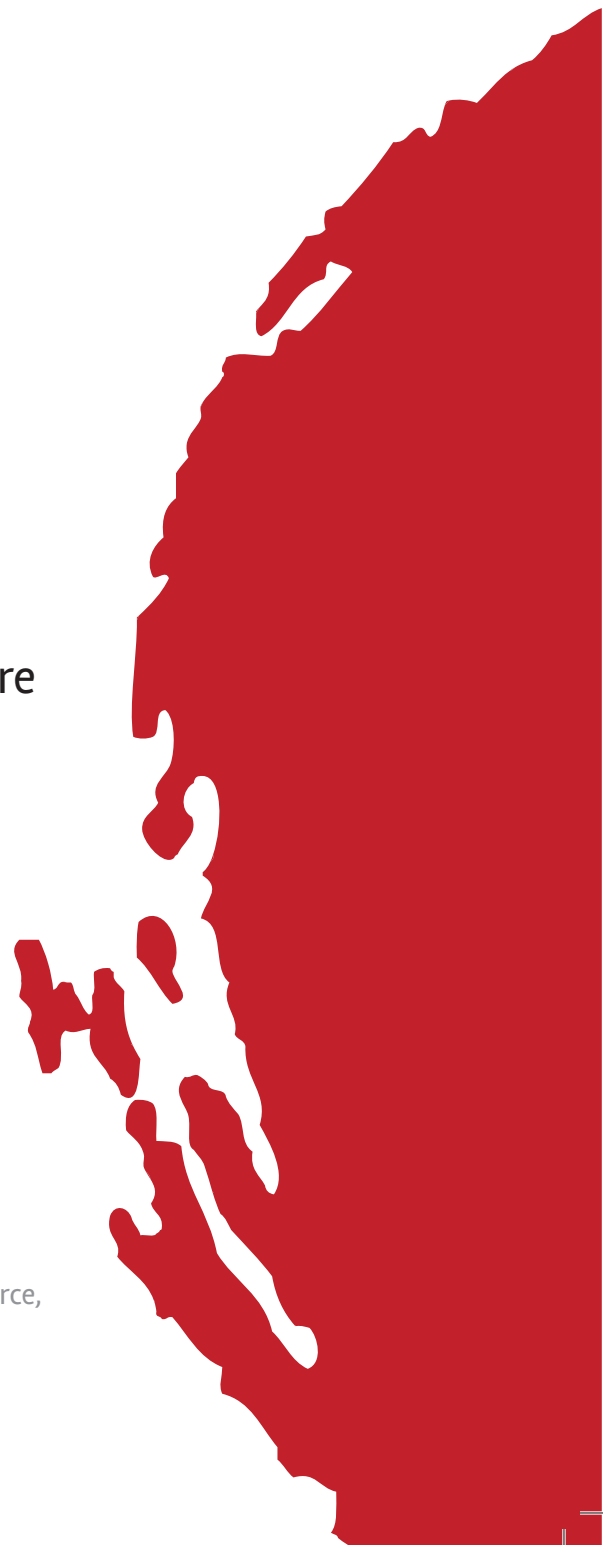

Supplement: 12879_2023_8625_MOESM3_ESM.pdf [file 12879_2023_8625_MOESM3_ESM.pdf]
