# Supplementary material for: Organisation of testing services, structural barriers and facilitators of routine HIV self-testing during sexually transmitted infection consultations: a qualitative study of patients and providers in Abidjan, Côte d’Ivoire
Source: PubMed Central journal article supplement (PMC10900544; doi:10.1186/s12879-023-08625-x), 2024-02-27

## Formation de formateurs

### Dispensation de l'autotest de dépistage du VIH dans le cadre du projet ATLAS en Côte d'Ivoire

Manuel du Formateur :  
Module 3 – Techniques de formation en andragogie

# Sommaire

|                                                                                                                                |           |
|--------------------------------------------------------------------------------------------------------------------------------|-----------|
| <b>MODULE 3 – TECHNIQUES DE FORMATION EN ANDRAGOGIE</b>                                                                        | <b>2</b>  |
| a. Résumé du contenu du module                                                                                                 | 2         |
| b. Fiche pédagogique du module                                                                                                 | 3         |
| c. Référentiel technique du module                                                                                             | 6         |
| <br>                                                                                                                           |           |
| <b>Séquence n°1</b>                                                                                                            | <b>6</b>  |
| Dispositif de formation en cascade                                                                                             | 6         |
| <br>                                                                                                                           |           |
| <i>Sous-séquence 1.1 :</i>                                                                                                     |           |
| Présenter le principe de formation en cascade et ses enjeux                                                                    | 6         |
| <br>                                                                                                                           |           |
| <b>Séquence n°2</b>                                                                                                            | <b>9</b>  |
| Principes d'andragogie                                                                                                         | 9         |
| <br>                                                                                                                           |           |
| <i>Sous-séquence 2.1 :</i>                                                                                                     |           |
| Définir l'andragogie et la formation professionnelle                                                                           | 9         |
| <br>                                                                                                                           |           |
| <i>Sous-séquence 2.2 :</i>                                                                                                     |           |
| Rappeler l'importance de la pratique                                                                                           | 10        |
| <br>                                                                                                                           |           |
| <b>Séquence n°3</b>                                                                                                            | <b>13</b> |
| Dynamique de formation                                                                                                         | 13        |
| <br>                                                                                                                           |           |
| <i>Sous-séquence 3.1 :</i>                                                                                                     |           |
| Etablir la cohésion au sein d'un groupe d'apprenant                                                                            | 13        |
| <br>                                                                                                                           |           |
| <i>Sous-séquence 3.2 :</i>                                                                                                     |           |
| Maintenir une dynamique de formation propice à l'apprentissage                                                                 | 14        |
| <br>                                                                                                                           |           |
| <i>Sous-séquence 3.3 :</i>                                                                                                     |           |
| Présenter les modalités d'organisation et de logistique                                                                        | 15        |
| <br>                                                                                                                           |           |
| <b>Séquence n°4</b>                                                                                                            | <b>16</b> |
| Techniques d'animation                                                                                                         | 16        |
| <br>                                                                                                                           |           |
| <i>Sous-séquence 4.1 :</i>                                                                                                     |           |
| Tester certaines techniques d'animation adaptées au public cible de la formation dispensée dans le cadre de la stratégie ATLAS | 16        |
| <br>                                                                                                                           |           |
| <i>Sous-séquence 4.2 :</i>                                                                                                     |           |
| Présenter le matériel de formation en cascade                                                                                  | 19        |

a. Résumé du contenu du module 3

**Durée :** ½ journée (4 heures, pauses incluses)

**Objectifs**

**pédagogiques :** A l'issue de ce module les participants seront capables :

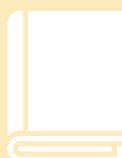

**Savoir :**

- D'expliquer la logique de formation en cascade et ses enjeux.
- D'expliquer les principes de l'andragogie.

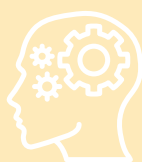

**Savoir-faire :**

- De concevoir et animer une formation pour adultes.

**Modalités :** Exposé et exercices pratiques

**Le module est divisé en 4 séquences et 8 sous-séquences :**

1. Dispositif de formation en cascade
  - 1.1 Présenter le principe de formation en cascade et ses enjeux
2. Principes d'andragogie
  - 2.1 Définir l'andragogie et la formation professionnelle
  - 2.2 Rappeler l'importance de la pratique
3. Dynamique de formation
  - 3.1 Etablir la cohésion au sein d'un groupe d'apprenant
  - 3.2 Maintenir une dynamique de formation propice à l'apprentissage
  - 3.3 Présenter les modalités d'organisation et de logistique
4. Techniques d'animation
  - 4.1 Tester certaines techniques d'animation adaptées au public cible de la formation dispensée dans le cadre de la stratégie ATLAS
  - 4.2 Présenter le matériel de formation en cascade

b. Fiche pédagogique du module 3

JOUR 2 – matin

| Horaire | Séquence                           | Objectifs                                                   | Temps | Méthode                                                                                                                                                                                                                                                                                                                                                                                                                                                                                                                                                                                                                                                                                                                                                                                                    | Support            | Observations |
|---------|------------------------------------|-------------------------------------------------------------|-------|------------------------------------------------------------------------------------------------------------------------------------------------------------------------------------------------------------------------------------------------------------------------------------------------------------------------------------------------------------------------------------------------------------------------------------------------------------------------------------------------------------------------------------------------------------------------------------------------------------------------------------------------------------------------------------------------------------------------------------------------------------------------------------------------------------|--------------------|--------------|
| 9H00    | Dispositif de formation en cascade | Présenter le principe de formation en cascade et ses enjeux | 25mn  | <p>Le formateur présente la stratégie de formation en cascade :</p> <ul style="list-style-type: none"> <li>- Les objectifs spécifiques de la formation au sein de la stratégie d'ATLAS : former les dispensateurs/accompagnateurs à l'utilisation des kits d'ADVIH</li> <li>- Le dispositif de formation : présenter la distinction des 3 groupes cibles de formation et les modules qui seront dispensés pour chacun d'entre eux</li> <li>- Etablir le lien entre la présente formation de formateurs et les formations en cascade qui seront réalisées avec les 3 groupes cibles</li> <li>- Terminer en présentant le module de formation en andragogie et son lien avec le module 4 qui va suivre (mise en application de certaines techniques abordées au cours du module sur l'andragogie)</li> </ul> | PPT (diapo 4 à 8)  |              |
|         |                                    |                                                             | 5mn   | Demander aux participants s'ils ont des questions, des besoins de précisions et y répondre.                                                                                                                                                                                                                                                                                                                                                                                                                                                                                                                                                                                                                                                                                                                | -                  |              |
| 9H30    | Principes d'Andragogie             | Définir l'andragogie et la formation professionnelle        | 25mn  | <p>Les participants se répartissent en groupe de 3, 4 personnes.<br/>En groupe, ils réalisent un brainstorming et note leurs réponses relatives aux questions suivantes :</p> <ul style="list-style-type: none"> <li>- Quelles sont les différences entre un enfant et un adulte ?</li> <li>- Quelles sont les spécificités de la formation pour un adulte ?</li> <li>- Quelles sont les spécificités de la formation professionnelle ?</li> </ul>                                                                                                                                                                                                                                                                                                                                                         | -                  |              |
|         |                                    |                                                             | 15mn  | Le formateur note les réponses des participants pour chaque question et, à l'aide de la présentation PPT, procède à une synthèse et complète les réponses s'il y a eu des manques ou des incompréhensions.                                                                                                                                                                                                                                                                                                                                                                                                                                                                                                                                                                                                 | PPT (diapo 9 à 10) |              |

| Horaire | Séquence               | Objectifs                                                      | Temps | Méthode                                                                                                                                                                                                                                                                                                                                                                                                                                                | Support                                                                                             | Observations |
|---------|------------------------|----------------------------------------------------------------|-------|--------------------------------------------------------------------------------------------------------------------------------------------------------------------------------------------------------------------------------------------------------------------------------------------------------------------------------------------------------------------------------------------------------------------------------------------------------|-----------------------------------------------------------------------------------------------------|--------------|
| 9H30    | Principes d'Andragogie | Rappeler l'importance de la pratique                           | 15mn  | Le formateur concentre son propos sur l'importance d'intégrer dans la formation pour adulte la dimension « pratique » et « mise en application ». Cet aspect est d'autant plus important dans une formation pour adulte à des fins de professionnalisation (transfert de compétences) ainsi qu'au regard de l'objectif recherché à travers l'acte de formation en cascade dans le cadre de la stratégie ATLAS.                                         | PPT (diapo 11 à 12)                                                                                 |              |
| 10H30   |                        | Valider l'atteinte des objectifs de la séquence                | 5mn   | Avant de passer à la prochaine séquence, demander aux participants s'ils ont des questions et y répondre.<br>PAUSE CAFE (30 MN)                                                                                                                                                                                                                                                                                                                        | -                                                                                                   |              |
| 11H00   | Dynamique de formation | Etablir la cohésion au sein d'un groupe d'apprenant            | 15mn  | Le formateur demande aux participants quelles sont, selon eux, les techniques pour établir dès le démarrage de la formation une cohésion du groupe d'apprenants. Le formateur note les réponses et complète en fonction des manques ou imprécisions. Le formateur procède à la synthèse des principaux points à retenir.                                                                                                                               | Flipchart + feutre                                                                                  |              |
|         |                        | Maintenir une dynamique de formation propice à l'apprentissage | 15mn  | Le formateur demande aux participants quelles sont, selon eux, les techniques pour maintenir une dynamique propice à l'apprentissage tout au long de la formation. Le formateur note les réponses et complète en fonction des manques ou imprécisions. Le formateur procède à la synthèse des principaux points à retenir.                                                                                                                             | Flipchart + feutre                                                                                  |              |
|         |                        | Présenter les modalités d'organisation et de logistique        | 15mn  | En s'appuyant sur les supports « Check-list organisation et logistique », « fiche d'évaluation » et les 3 kits de formation, le formateur présente :<br>- Les aspects à prendre en compte pour préparer une formation (support « check-list organisation et logistique »)<br>- Les outils à déployer pendant et après la formation (kits des 3 formations en cascade)<br>- Les modalités d'évaluation de la formation (support « fiche d'évaluation ») | Check-list organisation et logistique<br>Fiche d'évaluation<br>Les kits des 3 formations en cascade |              |
|         |                        | Valider l'atteinte des objectifs de la séquence                | 5mn   | Avant de passer à la prochaine séquence, demander aux participants s'ils ont des questions et y répondre.                                                                                                                                                                                                                                                                                                                                              | -                                                                                                   |              |

| Horaire             | Séquence               | Objectifs                                                                                                                      | Temps | Méthode                                                                                                                                                                                                                                                                                                                                                                                                                                                                          | Support                     | Observations |
|---------------------|------------------------|--------------------------------------------------------------------------------------------------------------------------------|-------|----------------------------------------------------------------------------------------------------------------------------------------------------------------------------------------------------------------------------------------------------------------------------------------------------------------------------------------------------------------------------------------------------------------------------------------------------------------------------------|-----------------------------|--------------|
| 11H50               | Techniques d'animation | Tester certaines techniques d'animation adaptées au public cible de la formation dispensée dans le cadre de la stratégie ATLAS | 10mn  | <p>Le cas de la simulation et du jeu de rôle.</p> <p>Le formateur demande aux participants quelles sont, selon eux, les techniques pour réaliser une simulation ou un jeu de rôle.</p> <p>Le formateur note les réponses et complète en fonction des manques ou imprécisions.</p> <p>Le formateur procède à la synthèse des principaux points à retenir et précise, à quels moments dans la formation des différentes catégories d'acteurs, ce type d'exercice sera employé.</p> | Flipchart + feutre          |              |
|                     |                        |                                                                                                                                | 10mn  | <p><u>Le cas du brainstorming.</u></p> <p>Le formateur demande aux participants quelles sont, selon eux, les techniques pour réaliser un brainstorming.</p> <p>Le formateur note les réponses et complète en fonction des manques ou imprécisions.</p> <p>Le formateur procède à la synthèse des principaux points à retenir et précise, à quels moments dans la formation des différentes catégories d'acteurs, ce type d'exercice sera employé.</p>                            | Flipchart + feutre          |              |
|                     |                        | Présenter le matériel de formation en cascade                                                                                  | 15mn  | <p>Le formateur présente les 3 kits de formation : celui pour les professionnels de santé, celui pour les pairs éducateurs et celui pour les écouteurs hotline.</p> <p>Le formateur précise que ces kits de formation reprennent ce qui est présenté au cours de ces trois jours de formation (à l'exception du module 3 dédié à l'andragogie).</p> <p>Le formateur explique les modalités de remises de ces kits de formation aux formateurs.</p>                               | Kits de formation 1, 2 et 3 |              |
| 12H30               |                        | Valider l'atteinte des objectifs de la séquence et du module                                                                   | 5mn   | Avant de clôturer le module, demander aux participants s'ils ont des questions et y répondre.                                                                                                                                                                                                                                                                                                                                                                                    | -                           |              |
| PAUSE DEJEUNER (1H) |                        |                                                                                                                                |       |                                                                                                                                                                                                                                                                                                                                                                                                                                                                                  |                             |              |

### c. Référentiel technique du module 3

|                               |                                                                                                                                                               |
|-------------------------------|---------------------------------------------------------------------------------------------------------------------------------------------------------------|
| <b>Séquence n°1</b>           | Dispositif de formation en cascade.                                                                                                                           |
| <b>Objectifs pédagogiques</b> | A la fin de cette séquence, les participants auront :<br>– Compris le principe de formation en cascade et les enjeux qui y sont liés                          |
| <b>Durée</b>                  | 30 minutes maximum                                                                                                                                            |
| <b>Matériel</b>               | Pour réaliser cette séquence, le formateur aura besoin :<br>– Du support de présentation PPT<br>– D'un kit de projection (ordinateur, vidéoprojecteur, écran) |

#### **Sous-séquence 1.1 : Présenter le principe de formation en cascade et ses enjeux**

**Durée :** 30 minutes

**Méthode :** En s'appuyant sur la présentation Power Point (PPT) mise à disposition, le formateur présente la stratégie de formation en cascade :

- Les objectifs spécifiques de la formation au sein de la stratégie d'ATLAS : former les dispensateurs/accompagnateurs à l'utilisation de l'ADVIH ;
- Le dispositif de formation : présenter la distinction des 3 groupes cibles de formation et les modules qui seront dispensés pour chacun d'entre eux ;
- Etablir le lien entre la présente formation de formateurs et les formations en cascade qui seront réalisées avec les 3 groupes cibles ;
- Terminer en présentant le module de formation en andragogie et son lien avec le module 4 qui va suivre (mise en application de certaines techniques abordées au cours du module sur l'andragogie.

**Référentiel technique :**

**La formation est divisée en 4 modules de formations.** L'objectif est de préparer les formateurs nationaux du système public et certains responsables des partenaires de mise en œuvre, candidats au « pool de formateurs », à répliquer ces mêmes formations auprès des différentes catégories d'acteurs au regard de la stratégie ATLAS, à savoir : **les professionnels de santé, les pairs éducateurs et les écoutants hotline.**

|                   | Jour 1                                                                                            | Jour 2                                                                                                                                                                     | Jour 3                                                                                                                                                                     |
|-------------------|---------------------------------------------------------------------------------------------------|----------------------------------------------------------------------------------------------------------------------------------------------------------------------------|----------------------------------------------------------------------------------------------------------------------------------------------------------------------------|
| <b>Matin</b>      | Module 1<br>Contexte épidémiologique, politique et stratégique autour de l'intégration de l'ADVIH | Module 3<br>Technique de formation en andragogie                                                                                                                           | Module 4<br>Le rôle, les qualités attendues et la dispensation d'autotests de dépistage du VIH dans le projet ATLAS par les parties prenantes<br>(2 <sup>ème</sup> partie) |
| <b>Après-midi</b> | Module 2<br>Présentation de l'ADVIH oral OraQuick® et des supports pour sa dispensation           | Module 4<br>Le rôle, les qualités attendues et la dispensation d'autotests de dépistage du VIH dans le projet ATLAS par les parties prenantes<br>(1 <sup>ère</sup> partie) | Module 4<br>Le rôle, les qualités attendues et la dispensation d'autotests de dépistage du VIH dans le projet ATLAS par les parties prenantes<br>(3 <sup>ème</sup> partie) |

**Le module 1 pose le cadre général de la formation.** Il situe l'ADVIH dans le contexte international et au sein du cadre légal de chacun des pays de la zone d'intervention (Côte d'Ivoire, Mali, Sénégal). Le projet ATLAS est introduit (objectifs, axes d'intervention, population cible, etc.).

**Le module 2 présente les éléments clés de la formation.** Il présente les concepts, les messages clés, les questions fréquentes et leurs réponses que les participants doivent maîtriser pour suivre l'ensemble de la formation et la répliquée. L'ADVIH est introduit et mis en pratique.

**Le module 3 aborde les techniques de formation en andragogie.** Il présente les concepts clés liés à l'andragogie, les spécificités des dispositifs de formation pour les adultes, et invite à l'exercice des principales méthodes de formation qui seront employées lors de la réplification du module 4 auprès des différentes catégories d'acteurs. Ce module n'est dispensé que dans le cadre de la formation de formateurs.

**Le module 4 explique en détail la stratégie de dépistage, le principe de l'ADVIH et de son intégration.** C'est le module le plus axé sur la pratique, in fine il ambitionne d'autonomiser les parties prenantes à dispenser l'autotest de dépistage du VIH, tout en véhiculant des valeurs d'écoute active, de conseil, de non-stigmatisation et de non-discrimination.

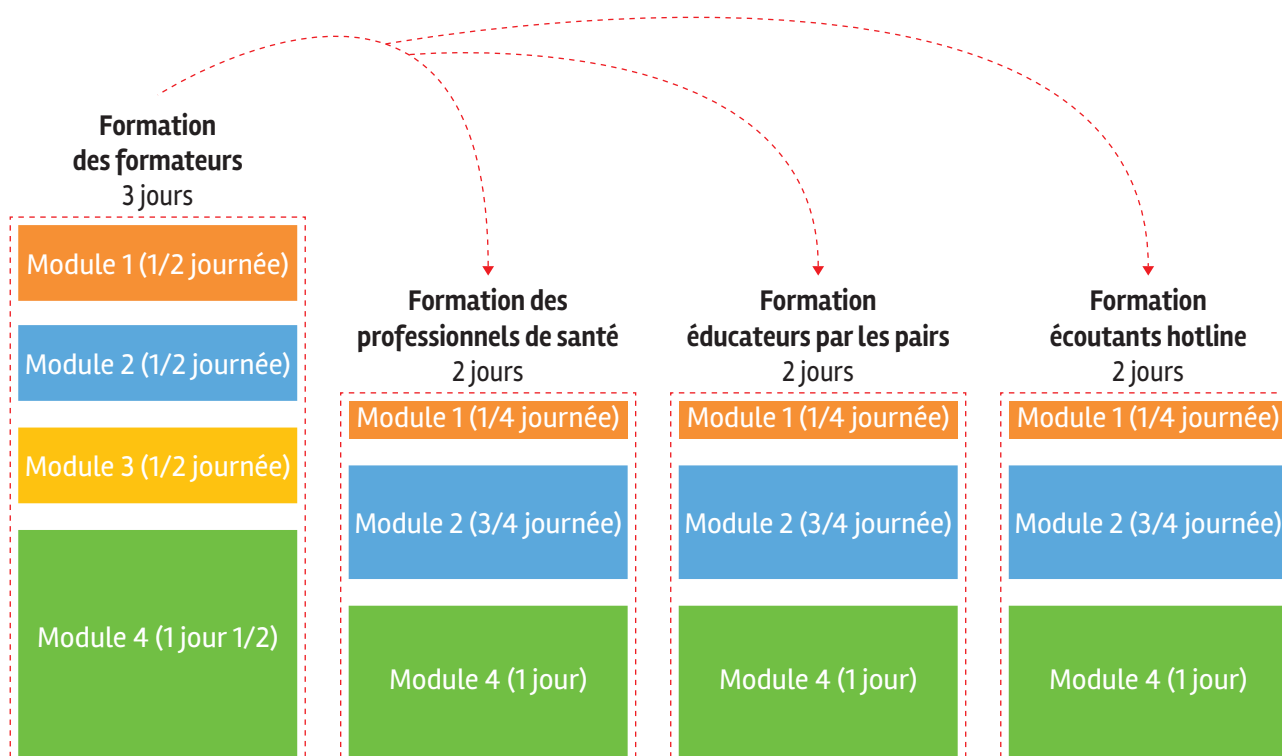

Au cours du module 3, nous allons voir les différents points suivants :

- Les principes de l'andragogie ;
- Les techniques pour établir une dynamique de formation ;
- Les techniques d'animation pour favoriser l'apprentissage des adultes.

Ce dernier point, les techniques d'animation, seront mises en pratique lors de l'administration du module 4 afin que les participants puissent s'exercer à la réalisation de ces différentes techniques (et ainsi améliorer leurs capacités de les reproduire une fois qu'ils seront eux-mêmes formateur).

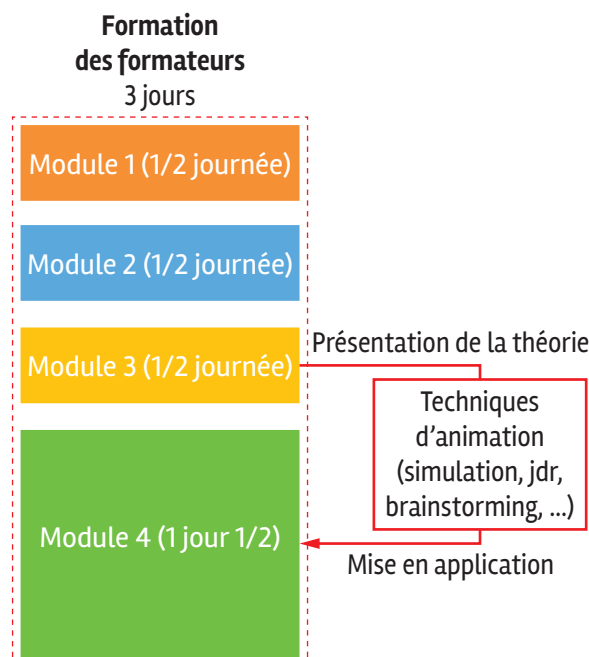



Le kit de formation contient l'ensemble du matériel nécessaire à l'animation d'une formation.

Le kit de formation est composé de deux types de matériaux :

• **Le matériel pour le formateur :**

- Le manuel de formation (comprenant les fiches pédagogiques et le référentiel technique) ;
- Les supports d'animation (comprenant l'ensemble des supports de présentation et d'animations d'exercices pratiques à réaliser lors de la formation).

• **Le matériel pour les participants :**

- Le support des participants (comprenant l'ensemble des informations qu'ils doivent retenir à l'issue de la formation, présenté de manière simple et facilement accessible).

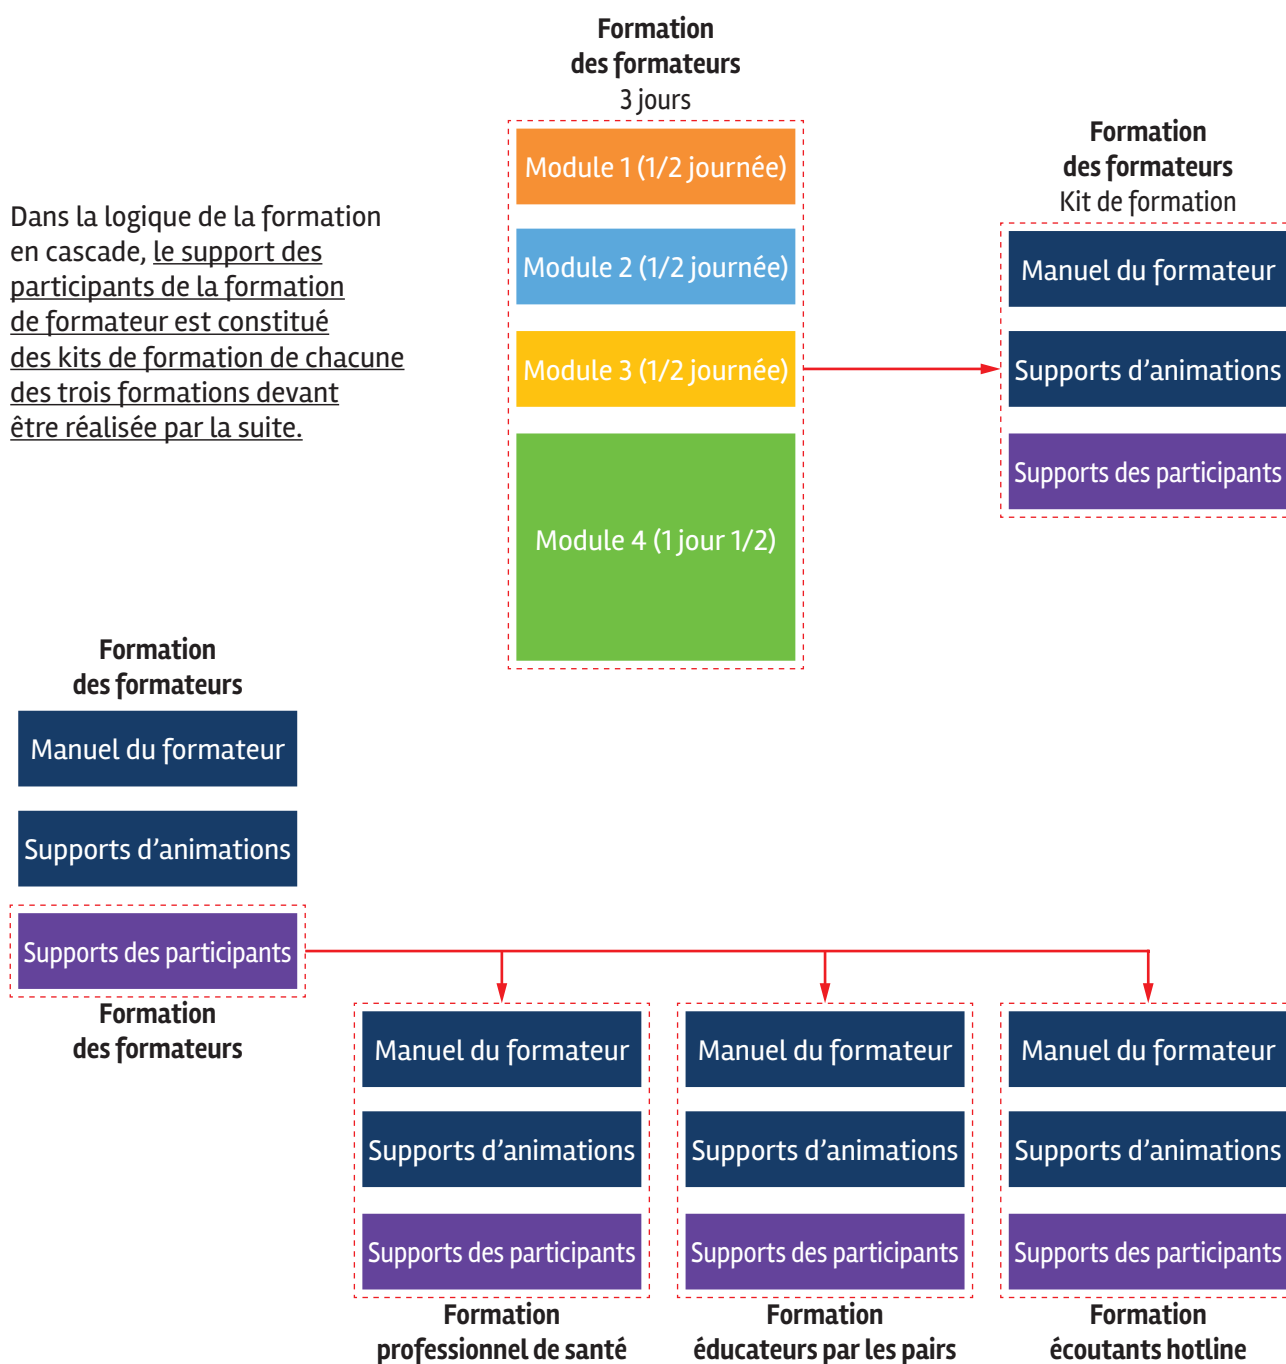

**Avant de clôturer la séquence, le formateur demande aux participants s'ils ont des questions et, le cas échéant, y répond.**



L'apprenant adulte a un bagage de savoirs, de connaissances, de savoir-faire et de facultés personnelles qu'il faut utiliser. Il a une expérience de la vie qu'il faut inclure dans l'action de formation.

En conséquence, le formateur se doit d'agir de la manière suivante :

- Toujours s'assurer que l'ensemble des participants comprennent ce qui est dit. Un bon formateur est capable de faire passer un contenu de différentes manières ;
- Autant que possible, présenter des exemples qui sont en relation avec la vie professionnelle des participants ;
- Si les participants ne sont pas motivés, il est nécessaire de comprendre pourquoi ;
- Toujours s'assurer que les participants puissent « vivre » leur formation en participant de façon pratique.

#### Points clés à retenir / à faire ressortir dans le brainstorming :

- Andragogie versus pédagogie (enseignement des enfants) :
  - Les adultes apportent expérience et connaissances dans toutes situations d'apprentissage ;
  - Les adultes sont motivés par l'information ou les tâches qui ont du sens à leurs yeux ;
  - Les adultes savent prendre des décisions et s'auto-diriger dans leur apprentissage ;
  - Les adultes ont des responsabilités et peuvent être impatients s'ils sentent perdre leur temps ;
  - Les adultes ont peur d'avoir l'air incompetent, professionnellement ou d'un point de vue personnel, lors de la participation dans un groupe.
- L'andragogie se différencie de la pédagogie par :
  - Une moindre capacité de mémorisation ;
  - Il n'accepte pas les idées toutes faites et a besoin d'être convaincu (esprit moins malléable et préjugés) ;
  - L'apprentissage est une remise en cause de ses certitudes, ce qui est parfois mal perçu ;
  - Par contre, l'adulte dispose d'une expérience, sur laquelle on peut s'appuyer, et d'un esprit critique plus développé.

Le formateur en andragogie apporte un nouveau savoir, mais laisse les participants développer les idées sur comment ils peuvent utiliser ce nouveau savoir.

#### **Sous-séquence 2.2 : Rappeler l'importance de la pratique**

**Durée :** 15 minutes

**Méthode :** En s'appuyant sur la présentation Power Point (PPT) mise à disposition :

- Le formateur concentre son propos sur l'importance d'intégrer dans la formation pour adulte la dimension « pratique » et « mise en application » ;
- Cet aspect est d'autant plus important dans une formation pour adulte à des fins de professionnalisation (transfert de compétences) ainsi qu'au regard de l'objectif recherché à travers l'acte de formation en cascade dans le cadre de la stratégie ATLAS.

**Référentiel technique :**

**L'adulte a besoin d'une dimension pratique et d'entrevoir les perspectives de mise en application pour s'investir dans une formation.**

Pour cela, l'adulte en formation a besoin de :

- Savoir où il va pour assimiler : le sujet doit être introduit, les objectifs pédagogiques rigoureusement annoncés, et mettre en avant le lien logique entre les phases de la formation ;
- Comprendre les raisons de la formation pour être motivé : les actions doivent être justifiées et

- acceptées par les apprenants ;
- S'appuyer sur son expérience pour se retrouver : la connaissance doit sembler surgir des connaissances passées, être une adaptation de ce qui est déjà connu ; l'enseignement doit être interactif.

Cet aspect est d'autant plus important dans une formation pour adulte à des fins de professionnalisation (transfert de compétences), ce qui est le cas dans l'acte de formation en cascade de la stratégie ATLAS.

### Qu'est-ce que la compétence ?

Une compétence est la somme des savoirs, de l'expérience (ou du savoir-faire), du comportement qui, mise en action, permet d'atteindre un but, dans le respect de normes ou de seuil prédéfinis.

C'est avec les compétences qu'on peut réaliser un objectif. La compétence d'action d'une personne vient de son savoir, de ses méthodes pour utiliser son savoir et de sa personnalité.

Une personne compétente est responsable de ses actions. Une personne compétente sait reconnaître et agir selon des besoins.

### De quoi est faite la compétence ?

La compétence de la personne formée lui permet de trouver des solutions dans les situations de travail.

Le formateur doit lui aussi voir des compétences spécifiques. Un formateur compétent n'a pas uniquement le savoir, les méthodes et les capacités d'adaptation.

Il sait aussi comprendre le monde dans lequel évolue la personne formée et agit en fonction.

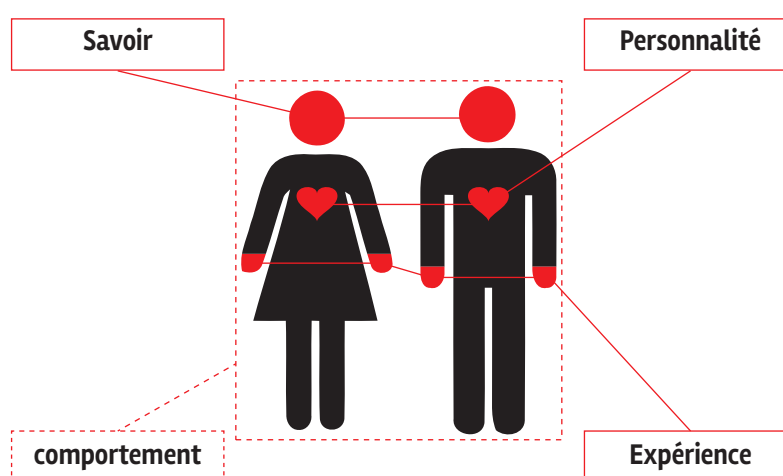

Une personne compétente est capable d'apporter des solutions aux problèmes qui se posent et adapte la formation en fonction des besoins. Elle a une compétence d'action pour le présent et pour le futur.

### Qu'est-ce que la qualification ?

Pour pouvoir assurer ce transfert de compétence, le formateur lui-même doit avoir les références professionnelles suffisantes pour offrir la formation.

Il doit maîtriser le sujet de la formation et prouver au centre de formation qu'il est la personne qualifiée pour offrir cette formation.

Généralement, le formateur qualifié a lui-même suivi une formation sur le sujet et est en mesure d'appréhender l'ensemble des facteurs d'influences inhérents au groupe cible qui font agir sur l'action de formation.

C'est pour cette raison qu'une formation de formateur est organisée en amont de la réalisation des trois types de formations par groupe cible.

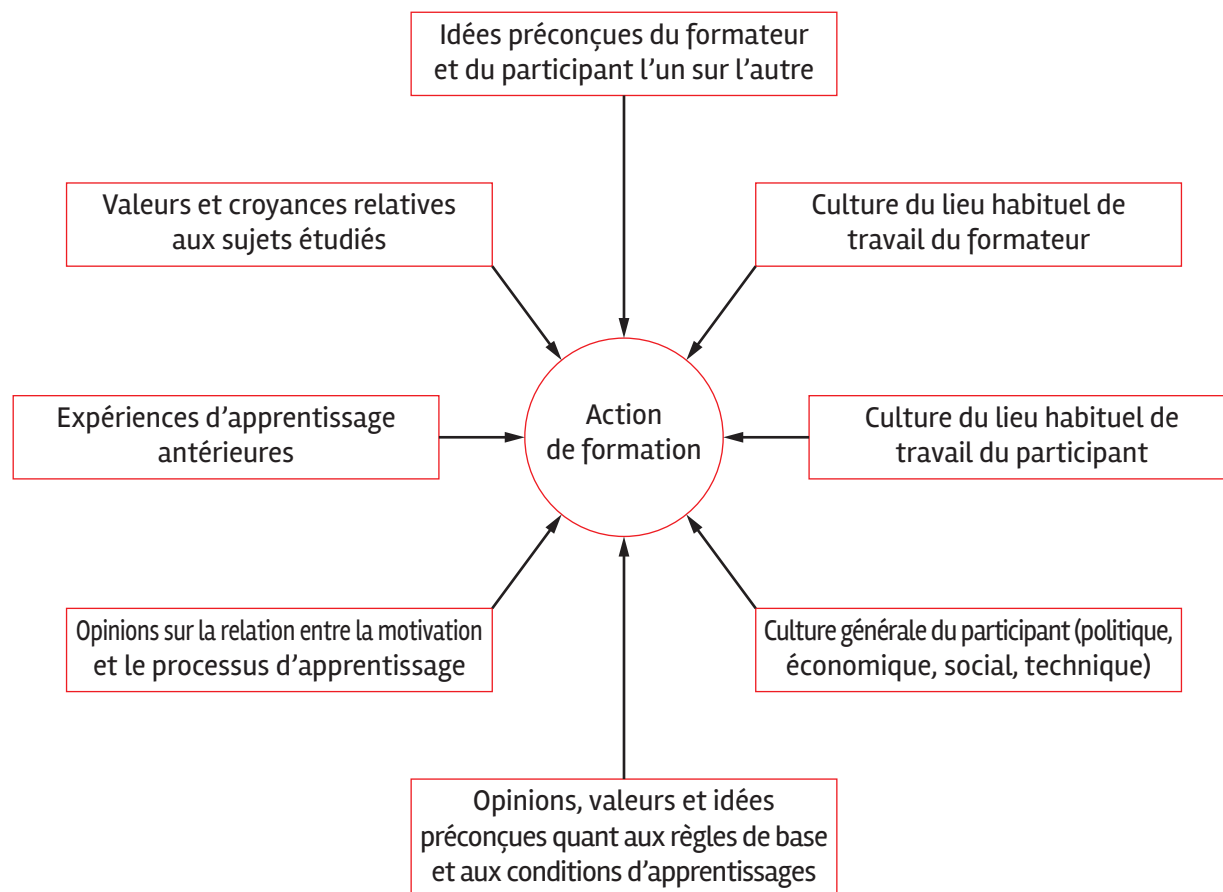

#### Points clés à retenir :

L'adulte en formation a besoin de :

- Savoir où il va pour assimiler : le sujet doit être introduit, les objectifs pédagogiques rigoureusement annoncés, et mettre en avant le lien logique entre les phases de la formation ;
- Comprendre les raisons de la formation pour être motivé : les actions doivent être justifiées et acceptées par les apprenants ;
- S'appuyer sur son expérience pour se retrouver : la connaissance doit sembler surgir des connaissances passées, être une adaptation de ce qui est déjà connu ; l'enseignement doit être interactif.

**Avant de clôturer la séquence, le formateur demande aux participants s'ils ont des questions et, le cas échéant, y répond.**

|                               |                                                                                                                                                                                                                                                                                                                                                                                |
|-------------------------------|--------------------------------------------------------------------------------------------------------------------------------------------------------------------------------------------------------------------------------------------------------------------------------------------------------------------------------------------------------------------------------|
| <b>Séquence n°3</b>           | Dynamique de formation                                                                                                                                                                                                                                                                                                                                                         |
| <b>Objectifs pédagogiques</b> | A la fin de cette séquence, les participants auront :<br><ul style="list-style-type: none"> <li>- Compris comment établir une cohésion au sein d'un groupe d'apprenant</li> <li>- Compris comment maintenir une dynamique de formation propice à l'apprentissage</li> <li>- Compris comment appliquer les modalités d'organisation et de logistique d'une formation</li> </ul> |
| <b>Durée</b>                  | 50 minutes maximum                                                                                                                                                                                                                                                                                                                                                             |
| <b>Matériel</b>               | Pour réaliser cette séquence, le formateur aura besoin :<br><ul style="list-style-type: none"> <li>- D'un flipchart et de feutres de différentes couleurs (noir, rouge, bleu, vert)</li> <li>- Du support « check-list organisation et logistique »</li> </ul>                                                                                                                 |

### **Sous-séquence 3.1 : Etablir la cohésion au sein d'un groupe d'apprenant**

**Durée :** 15 minutes

**Méthode :** En s'appuyant sur le référentiel technique mise à disposition et le flipchart :

- Le formateur demande aux participants quelles sont, selon eux, les techniques pour établir dès le démarrage de la formation une cohésion du groupe d'apprenants ;
- Le formateur note les réponses et complète en fonction des manques ou imprécisions ;
- Le formateur procède à la synthèse des principaux points à retenir.

#### **Référentiel technique :**

La plupart du temps, un groupe de formation sera « hétérogène », les participants viendront d'horizons différents avec des attentes, un savoir et des positions différentes. Lorsque l'on commence une formation, il faut établir une « dynamique de groupe » positive et faire que la dynamique reste positive pendant toute la formation. Pour cela, il y a des pistes à suivre. Comme on ne sait pas si le groupe se connaît déjà bien, on doit :

#### Voir quelles sont les relations entre les participants

- Y-a-t-il un ou plusieurs supérieurs hiérarchiques ?
- Y-a-t-il des notables qui doivent être traités de manière spécifique ?

#### Comment s'y prendre ?

Faire une séance de présentation dans laquelle les participants diront :

- Comment s'appellent-ils ?
- Que connaissent-ils déjà ?
- Avec qui ont-ils déjà travaillé ou de qui reçoivent-ils parfois des consignes ?

Lors de la séance de présentation, l'équipe de formation prendra des notes pour se rappeler comment intégrer les différentes personnes présentes dans la salle.

Il est important que les relations entre les participants soient prises au sérieux.

### Sous-séquence 3.2 : Maintenir une dynamique de formation propice à l'apprentissage

**Durée** : 15 minutes

**Méthode** : En s'appuyant sur le référentiel technique mise à disposition et le flipchart :

- Le formateur demande aux participants quelles sont, selon eux, les techniques pour maintenir une dynamique propice à l'apprentissage tout au long de la formation ;
- Le formateur note les réponses et complète en fonction des manques ou imprécisions ;
- Le formateur procède à la synthèse des principaux points à retenir.

#### **Référentiel technique :**

##### La dynamique de groupe évolue pendant la formation !

Généralement, au début de la formation, on assiste à une certaine euphorie. Le groupe est heureux, soit de se revoir, soit de faire connaissance.

Après cette phase, on peut cependant assister aux phénomènes suivants :

- **Agressivité verbale** : les participants qui se sentent supérieurs au niveau du savoir ou de la hiérarchie locale imposent leur point de vue ;
- **Mutisme** : les participants qui se sentent inférieurs ne disent plus rien ;
- **Désintérêt** : les participants qui sont venus pour des raisons annexes ou qui refusent l'agressivité se désintéressent de la formation.

##### Que faire ?

- Choisir des méthodes qui permettent à chacun de prendre un rôle valorisant ;
- Laisser aux « supérieurs » un espace pour exprimer leur savoir ou leur position ;
- Faire récapituler des positions par les « muets » ;
- Donner une parole active aux « désintéressés » pour qu'ils se rendent compte de leur savoir.

##### Veiller à maintenir la cohésion !

Tous les participants n'apprennent pas à la même vitesse. Les « rapides » peuvent à certains moments prendre un rôle de co-formateur. Ainsi, ils ne seront pas désintéressés même si d'autres ont besoin de plus de temps qu'eux.

La dynamique de groupe demande qu'il y ait un échange entre tous les participants en tenant compte du phénomène suivant : toutes les questions posées doivent être prises au sérieux par l'équipe de formation pour que ceux qui manquent de savoir osent se prononcer.

##### Introduire les contenus thématiques

Pour que la formation se déroule bien, il est important que tout le groupe soit « en phase ». Cela veut dire que tout le monde doit comprendre pourquoi la formation est importante et pourquoi il est important que tout le monde participe activement.

Les participants doivent pouvoir s'identifier avec les contenus de formation et avoir envie eux-mêmes d'en apprendre plus sur le sujet.

Lorsque le formateur présente le programme, il peut commencer par présenter :

- Le déroulement général de la formation
  - Pourquoi sommes-nous réunis ici ?
  - Quelles sont les conditions générales y compris quelle est la hauteur des per diem et autres questions de remboursement.
- Présenter ensuite la programmation générale
  - Le début et la fin de chaque journée ;
  - Les pauses prévues.

- Passer ensuite à l'introduction des contenus

Une fois que le cadre est posé, les participants sont en mesure de se concentrer sur les contenus de formation.

L'équipe de formation résume les grandes lignes de ce qui sera traité en présentant le programme de la manière suivante :

- Si le programme est imprimé pour tous les participants, ceux-ci peuvent suivre sur le papier ;
- Si le programme n'est pas distribué, l'équipe de formation peut se servir des outils à sa disposition pour visualiser le programme (papier blanc, tableau noir, métaplan, etc.) ;
- Si des supports sont distribués, il faut l'annoncer pendant l'introduction.

Il est important que l'introduction des contenus thématiques reste en mémoire. Cela veut dire que le programme doit être visible pour tout le monde pendant toute la formation. De cette manière, on peut opérer des changements avec l'accord du groupe entier quand ceux-ci s'imposent.

Si les participants comprennent le déroulement de la formation, les changements qui ont lieu et surtout s'ils peuvent eux-mêmes apporter des changements, ils s'identifieront plus avec la formation et seront bien plus actifs.

#### **Points clés à retenir :**

- La plupart du temps, un groupe de formation sera « hétérogène », les participants viendront d'horizons différents avec des attentes, un savoir et des positions différentes ;
- En début de formation, il faut établir une « dynamique de groupe » positive et faire que la dynamique reste positive pendant toute la formation ;
- Pour cela, il est nécessaire de connaître les relations entre les participants ;
- Il est également nécessaire de veiller à bien gérer les résistances (au début comme tout au long de la formation, car la dynamique de groupe évolue) ;
- Tous les participants n'apprennent pas à la même vitesse : veiller à maintenir la cohésion ;
- Toutes les questions posées doivent être prises au sérieux pour que chacun ose se prononcer.

### **Sous-séquence 3.3 : Présenter les modalités d'organisation et de logistique**

**Durée :** 15 minutes

**Méthode :** En s'appuyant sur les supports « Check-list organisation et logistique », « fiche d'évaluation » et les 3 kits de formation, le formateur présente :

- Les aspects à prendre en compte pour préparer une formation (support « check-list organisation et logistique ») ;
- Les outils à déployer pendant et après la formation (kits des 3 formations en cascade) ;
- Les modalités d'évaluation de la formation (support « fiche d'évaluation »).

**Avant de clôturer la séquence, le formateur demande aux participants s'ils ont des questions et, le cas échéant, y répond.**



|                               |                                                                                                                                                                                                                                                                                               |
|-------------------------------|-----------------------------------------------------------------------------------------------------------------------------------------------------------------------------------------------------------------------------------------------------------------------------------------------|
| <b>Séquence n°4</b>           | Techniques d'animation                                                                                                                                                                                                                                                                        |
| <b>Objectifs pédagogiques</b> | A la fin de cette séquence, les participants auront :<br>- Testé certaines techniques d'animation adaptées au public cible de la formation dispensée dans le cadre de la stratégie ATLAS<br>- Pris connaissance et compris comment utiliser le matériel de formation en cascade               |
| <b>Durée</b>                  | 40 minutes maximum                                                                                                                                                                                                                                                                            |
| <b>Matériel</b>               | Pour réaliser cette séquence, le formateur aura besoin :<br>- Du support de présentation PPT<br>- D'un kit de projection (ordinateur, vidéoprojecteur, écran)<br>- Des kits de formation pour (1) les professionnels de santé, (2) les éducateurs par les pairs, et (3) les écoutants hotline |

#### **Sous-séquence 4.1 : Tester certaines techniques d'animation adaptées au public cible de la formation dispensée dans le cadre de la stratégie ATLAS**

**Durée :** 20 minutes

**Méthode :** En s'appuyant sur le référentiel technique mise à disposition et le flipchart :

- Le formateur invite les participants à considérer le cas de la simulation et du jeu de rôle :
  - Le formateur demande aux participants quelles sont, selon eux, les techniques pour réaliser une simulation ou un jeu de rôle
  - Le formateur note les réponses et complète en fonction des manques ou imprécisions
  - Le formateur procède à la synthèse des principaux points à retenir et précise, à quels moments dans la formation des différentes catégories d'acteurs, ce type d'exercice sera employé
- Le formateur invite les participants à considérer le cas du brainstorming :
  - Le formateur demande aux participants quelles sont, selon eux, les techniques pour réaliser un brainstorming
  - Le formateur note les réponses et complète en fonction des manques ou imprécisions
  - Le formateur procède à la synthèse des principaux points à retenir et précise, à quels moments dans la formation des différentes catégories d'acteurs, ce type d'exercice sera employé

**Référentiel technique :**

#### **Jeu de rôles**

Les jeux de rôle peuvent se révéler être des outils de formation très utiles. Ils peuvent aussi faire partie des activités les plus complexes à préparer et à gérer.

Lorsque le jeu de rôle est bien mené, il aura un fort impact mais s'il ne se déroule pas bien, il engendrera critiques et frustrations.

Les formateurs qui intègrent des jeux de rôles qu'ils n'ont pas développés vont au-devant de complications potentielles et doivent le faire en ayant réfléchi à leur pertinence et à leur efficacité.

Cela nécessite une attention particulière aux aspects culturels et hiérarchiques qui peuvent affecter le déroulement d'un jeu de rôle.

**Méthode :**

Le jeu de rôle est en fait la re-création d'une scène présente, anticipée ou imaginaire. Cette scène contiendra donc certainement des actions et des dialogues.

Le « scénario » d'un jeu de rôle implique deux éléments :

- Une description claire du point de départ, par exemple : le contexte, ce qui a mené à la situation de départ, qui est impliqué, dans quelle mesure ?
- Une indication (appelée aussi 'briefing') concernant la réaction ou le comportement potentiel de chaque personne une fois le jeu commencé.

Le jeu de rôle vise la spontanéité dans un contexte établi. Les acteurs n'ont pas de dialogue spécifique ou un but prédéterminé. Leur fonction est d'explorer ce qui peut se passer et comment les différentes actions ou déclarations peuvent influencer le devenir de la situation. Les jeux de rôles donnent aussi la possibilité aux participants d'envisager ce qu'ils pourraient ressentir face à certaines situations.

Un formateur qui organise ou utilise un jeu de rôle doit garder en mémoire les différentes étapes du jeu de rôle. Il a besoin d'un plan clair qui contient les éléments suivants :

- Planifier le jeu de rôle à l'avance ;
- Préparer le scénario à l'avance ;
- Informer et engager les participants à participer, à mener l'activité ;
- Arrêter le jeu de rôle ;
- Clarifier certains éléments inachevés survenus pendant le jeu ;
- Amener les participants à sortir de leur personnage et les amener à restituer ce qu'ils ont ressentis ;
- Faire le bilan du jeu de rôle ;
- Extraire ce qui a été appris du jeu de rôle ;
- Transposer ce qui a été appris au monde réel.

Si l'une de ces étapes est incomplète ou omise, le formateur ou les participants risquent d'avoir des problèmes.

#### Points clés à retenir :

- Le « scénario » d'un jeu de rôle implique deux éléments :
  - Une description claire du point de départ, par exemple : le contexte, ce qui a mené à la situation de départ, qui est impliqué, dans quelle mesure ?
  - Une indication concernant la réaction ou le comportement potentiel de chaque personne une fois le jeu commencé.
- Le jeu de rôle vise la spontanéité dans un contexte établi. Les acteurs n'ont pas de dialogue spécifique ou un but prédéterminé.
- Leur fonction est d'explorer ce qui peut se passer et comment les différentes actions ou déclarations peuvent influencer le devenir de la situation.
- Les jeux de rôles donnent aussi la possibilité aux participants d'envisager ce qu'ils pourraient ressentir face à certaines situations.
- Le jeu de rôles doit toujours faire l'objet d'un bilan dont on extrait ce qui a été appris pour le transposer au monde réel.

#### Simulations

Une simulation tend à répéter les dynamiques d'une situation complexe dans laquelle interagissent des personnes ou des processus. Les simulations ressemblent aux jeux de rôle car là aussi les participants apprennent en faisant et en expérimentant.

La grande différence étant que dans la simulation, ils restent eux-mêmes, ils n'endossent pas de rôles déterminés. Une simulation peut être utilisée pour voir comment certaines personnes ou certains processus réagiraient devant un certain événement ou face à certaines contraintes.

Grâce à la simulation, il est possible d'expérimenter une certaine situation et les réactions des participants. Même si le processus est créé pour être aussi près que possible de la réalité, il reste tout de même sous contrôle pendant l'exercice. Dans certaines simulations l'expérimentation est encouragée. De même que pour les jeux de rôle, la réussite d'une simulation va dépendre en grande partie de la qualité de sa préparation.

Méthode : cf. d'abord : Jeu de rôles ci-dessus.

Les principales étapes à suivre sont les suivantes :

- La simulation nécessite une grande clarté : quelle est la situation à recréer pendant la simulation ? Quels sont les processus impliqués dans cette situation ? Que veut-on illustrer par cette simulation ?
- La fonction de chaque groupe ou de chaque personne participant à la simulation doit être identifiée. Plus la description sera détaillée, plus la simulation collera avec la réalité mais cela pourra aussi limiter l'étendue de la créativité et de l'inventivité des participants qui développent leur rôle.

A noter que dans le cas du jeu de rôles comme de la simulation, il est possible de demander à une partie des participants d'exercer le rôle d'observateur.

Le rôle d'observateur consiste à observer les participants du jeu de rôle comme de la simulation et à noter les manières de faire sur des champs d'observation précis.

Dans le cas d'un dispositif introduisant le rôle des observateurs, la situation d'apprentissage est plus au niveau des observateurs que des pratiquants du jeu de rôle ou de la simulation.

#### **Points clés à retenir :**

- Une simulation tend à répéter les dynamiques d'une situation complexe dans laquelle interagissent des personnes ou des processus.
- Les simulations ressemblent aux jeux de rôle car là aussi les participants apprennent en faisant et en expérimentant.
- La grande différence étant que dans la simulation, ils restent eux-mêmes, ils n'endossent pas de rôles déterminés.
- La méthode est similaire à celle du jeu de rôle.
- A noter que dans le cas du jeu de rôles comme de la simulation, il est possible de demander à une partie des participants d'exercer le rôle d'observateur.

### **Brainstorming**

Les brainstormings représentent une manière simple et efficace de générer des idées et des suggestions. Les brainstormings peuvent produire une grande quantité d'idées dont la qualité n'est pas à prendre en compte immédiatement ; il sera temps ensuite de les classer et de faire ressortir les priorités pour affiner les résultats. Ils sont utiles pour introduire des thèmes et générer un intérêt avant d'entamer un travail plus en profondeur. Ils peuvent être utilisés pour dynamiser un groupe ou stimuler une discussion.

#### **Méthode**

Un problème ou une question est identifié ou défini. Le groupe donne des idées correspondant à des réponses ou à des solutions à cette question ou à ce problème qui sont notées sur le flip chart (tableau papier). Encouragez la rapidité de la venue des idées. Le groupe doit comprendre que :

- Les idées et les réponses données sont acceptées et notées sans commentaire ;
- A ce stade, la quantité est plus importante que la qualité ;
- Dans cet exercice, toutes les réponses sont aussi méritantes les unes que les autres ;
- Une réponse peut être utilisée pour déclencher d'autres réponses.

Les idées trouvées grâce à un brainstorming ou une discussion peuvent varier en qualité, pertinence, précision ou intérêt. Le nombre d'idées peut dépasser ce que le groupe peut traiter dans un temps imparti. Il faut alors utiliser des méthodes de classement (indexer, classer et mettre en priorité des idées).

### Exemples de situations où le brainstorming peut être efficace :

- Pour créer des options pour un plan d'action ;
- Pour stimuler une discussion un peu lente ;
- Pour identifier des risques d'une situation donnée.

#### Points clés à retenir :

- Les brainstormings représentent une manière simple et efficace de générer des idées et des suggestions ;
- Les idées trouvées grâce à un brainstorming ou une discussion peuvent varier en qualité, pertinence, précision ou intérêt ;
- A l'issue d'un brainstorming, il est indispensable de classer et mettre en priorité les idées.

### **Sous-séquence 4.2 : Présenter le matériel de formation en cascade**

**Durée :** 15 minutes

**Méthode :** En s'appuyant sur les 3 kits de formation, le formateur :

- Présente les 3 kits de formation : celui pour les professionnels de santé, celui pour les éducateurs par les pairs et celui pour les écoutants hotline ;
- Précise que ces kits de formation reprennent ce qui est présenté au cours de ces trois jours de formation (à l'exception du module 3 dédié à l'andragogie) ;
- Explique les modalités de remises de ces kits de formation aux formateurs.

**Avant de clôturer le module, le formateur demande aux participants s'ils ont des questions et, le cas échéant, y répond.**

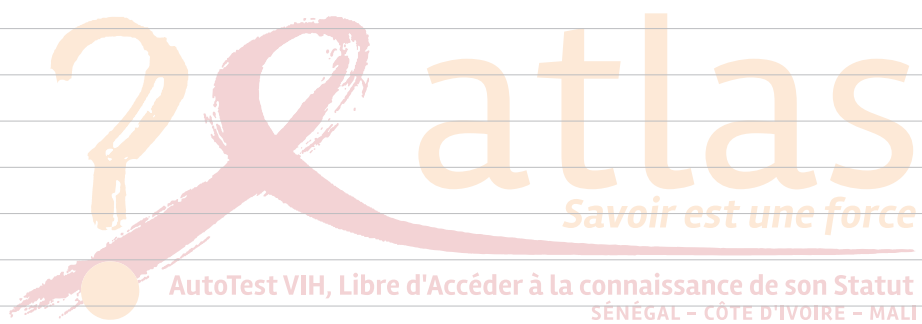

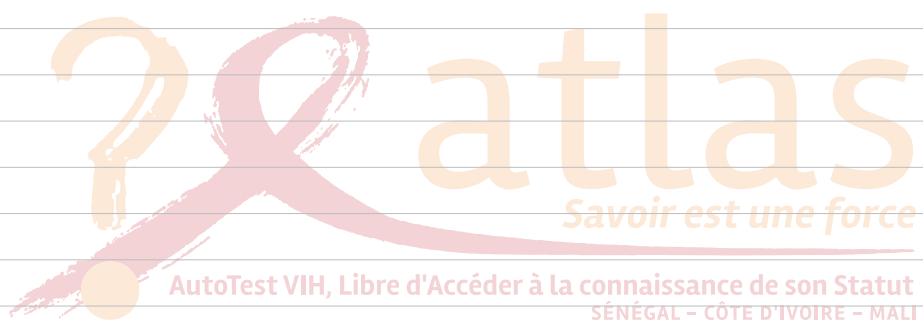



Le projet ATLAS est mis en œuvre en Côte d'Ivoire en partenariat avec le Ministère de la Santé et de l'Hygiène Publique et le Programme National de Lutte contre le Sida.

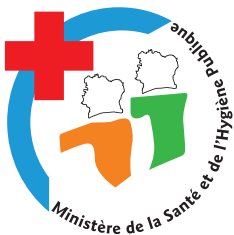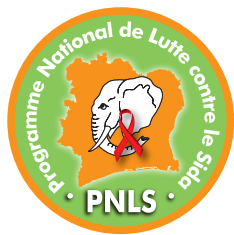

Ce document peut être utilisé ou reproduit sous réserve de mentionner la source, et uniquement pour un usage non commercial.

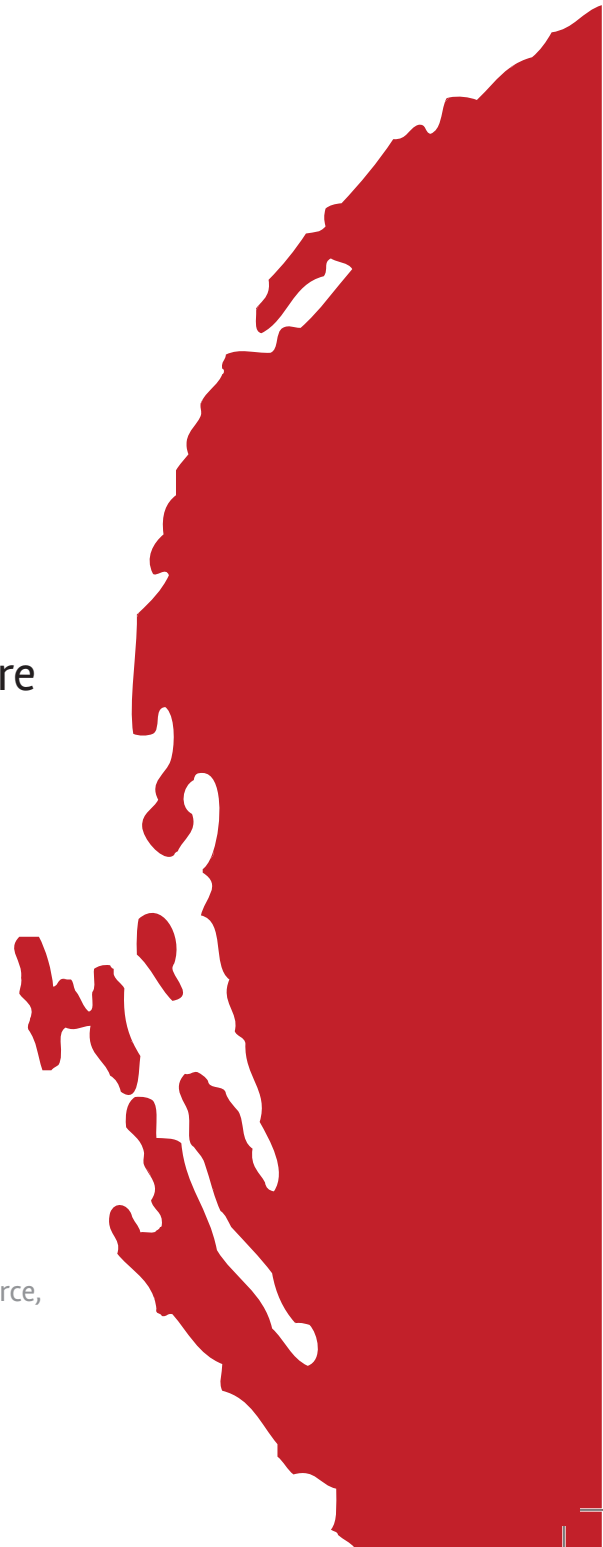

Supplement: 12879_2023_8625_MOESM4_ESM.pdf [file 12879_2023_8625_MOESM4_ESM.pdf]
