# Supplementary material for: Organisation of testing services, structural barriers and facilitators of routine HIV self-testing during sexually transmitted infection consultations: a qualitative study of patients and providers in Abidjan, Côte d’Ivoire
Source: PubMed Central journal article supplement (PMC10900544; doi:10.1186/s12879-023-08625-x), 2024-02-27

## Formation de formateurs

### Dispensation de l'autotest de dépistage du VIH dans le cadre du projet ATLAS en Côte d'Ivoire

**Manuel du Formateur :**  
**Module 4 – Le rôle, les qualités attendues des acteurs impliqués  
et la dispensation de l'autotest de dépistage du VIH  
dans le projet ATLAS**

# Sommaire

|                                                                                                                                                       |           |
|-------------------------------------------------------------------------------------------------------------------------------------------------------|-----------|
| <b>MODULE 4 – LE ROLE, LES QUALITES ATTENDUES DES ACTEURS IMPLIQUES<br/>ET LA DISPENSATION DE L'AUTOTEST DE DEPISTAGE DU VIH DANS LE PROJET ATLAS</b> | <b>3</b>  |
| a. Résumé du contenu du module 4                                                                                                                      | 3         |
| b. Fiche pédagogique du module 4                                                                                                                      | 5         |
| c. Référentiel technique du module 4                                                                                                                  | 10        |
| <br>                                                                                                                                                  |           |
| <b>Séquence n°1</b>                                                                                                                                   | <b>13</b> |
| Les enjeux et principes fondamentaux pour le dépistage<br>des différentes populations ciblées                                                         | 13        |
| <br>                                                                                                                                                  |           |
| <i>Sous-séquence 1.1</i> : Expliquer les défis liés à la discrimination<br>et la stigmatisation                                                       | 13        |
| <br>                                                                                                                                                  |           |
| <i>Sous-séquence 1.2</i> : Revenir sur les principes fondamentaux pour le dépistage                                                                   | 17        |
| <br>                                                                                                                                                  |           |
| <i>Sous-séquence 1.3</i> : Présenter les populations cibles<br>et l'importance du dépistage                                                           | 19        |
| <br>                                                                                                                                                  |           |
| <b>Séquence n°2</b>                                                                                                                                   | <b>20</b> |
| Les compétences d'écoute active et de conseil                                                                                                         | 20        |
| <br>                                                                                                                                                  |           |
| <i>Sous-séquence 2.1</i> : Etablir le lien entre le conseil et la dispensation<br>de kits d'ADVIH dans le projet ATLAS                                | 20        |
| <br>                                                                                                                                                  |           |
| <i>Sous-séquence 2.2</i> : Présenter la posture d'écoute active et de conseil                                                                         | 21        |
| <br>                                                                                                                                                  |           |
| <i>Sous-séquence 2.3</i> : Simuler la posture d'écoute active et de conseil<br>dans le cas de la dispensation de kits d'ADVIH                         | 22        |
| <br>                                                                                                                                                  |           |
| <i>Sous-séquence 2.4</i> : Synthétiser les enseignements tirés de la pratique<br>de la simulation                                                     | 23        |
| <br>                                                                                                                                                  |           |
| <b>Séquence n°3</b>                                                                                                                                   | <b>24</b> |
| Les spécificités de dispensation de kits d'ADVIH dans le projet ATLAS                                                                                 | 24        |
| <br>                                                                                                                                                  |           |
| <i>Sous-séquence 3.1</i> : Introduire aux spécificités de dispensation de kits d'ADVIH                                                                | 24        |
| <br>                                                                                                                                                  |           |
| <i>Sous-séquence 3.2</i> : Les aspects éthiques et les implications<br>propres à la notification                                                      | 24        |
| <br>                                                                                                                                                  |           |
| <i>Sous-séquence 3.3</i> : Synthétiser les enseignements tirés<br>de la pratique du brainstorming                                                     | 28        |
| <br>                                                                                                                                                  |           |
| <i>Sous-séquence 3.4</i> : Présenter les différentes modalités de dispensation<br>ATLAS dans la pratique                                              | 28        |
| <br>                                                                                                                                                  |           |
| <i>Sous-séquence 3.5</i> : Présenter le rôle des écoutants                                                                                            | 30        |

|                                                                                                                                                                                                     |    |
|-----------------------------------------------------------------------------------------------------------------------------------------------------------------------------------------------------|----|
| <b>Séquence n°4</b>                                                                                                                                                                                 | 32 |
| L'importance et les défis du lien vers la confirmation et l'entrée dans les soins                                                                                                                   | 32 |
| <i>Sous-séquence 4.1</i> : Expliquer l'objectif final derrière l'acte de dépistage : aller confirmer le diagnostic et commencer un traitement                                                       | 32 |
| <b>Séquence n°5</b>                                                                                                                                                                                 | 34 |
| Conseil et messages associés à la dispensation non-assistée de kits d'ADVIH                                                                                                                         | 34 |
| <i>Sous-séquence 5.1</i> : Rappeler les messages clés                                                                                                                                               | 34 |
| <i>Sous-séquence 5.2</i> : Présenter les consignes                                                                                                                                                  | 34 |
| <i>Sous-séquence 5.3</i> : Mettre en exergue les caractéristiques spécifiques de la dispensation non-assistée en présentiel ou à distance (cas des professionnels de santé et des pairs éducateurs) | 34 |
| <i>Sous-séquence 5.4</i> : Synthétiser les enseignements                                                                                                                                            | 35 |
| <b>Séquence n°6</b>                                                                                                                                                                                 | 36 |
| Conseil et messages associés à la dispensation assistée de kits d'ADVIH                                                                                                                             | 36 |
| <i>Sous-séquence 6.1</i> : Présenter les consignes                                                                                                                                                  | 36 |
| <i>Sous-séquence 6.2</i> : Mettre en exergue les caractéristiques spécifiques de la dispensation assistée en présentiel ou à distance (cas des écoutants hotline)                                   | 36 |
| <i>Sous-séquence 6.3</i> : Synthétiser les enseignements                                                                                                                                            | 37 |
| <b>Séquence n°7</b>                                                                                                                                                                                 | 38 |
| Les outils de suivi-évaluation                                                                                                                                                                      | 38 |
| <i>Sous-séquence 7.1</i> : Présenter les différents outils                                                                                                                                          | 38 |
| <i>Sous-séquence 7.2</i> : Tester les outils                                                                                                                                                        | 40 |
| <b>Séquence n°8</b>                                                                                                                                                                                 | 41 |
| Conclusion                                                                                                                                                                                          | 41 |
| <i>Sous-séquence 8.1</i> : Revenir sur le matériel de formation des différentes parties prenantes                                                                                                   | 41 |
| <i>Sous-séquence 8.2</i> : Revenir sur des points incompris et clôturer la formation                                                                                                                | 41 |
| <i>Sous-séquence 8.3</i> : Apprécier le niveau de satisfaction des participants selon différents paramètres                                                                                         | 41 |

## MODULE 4 – LE ROLE, LES QUALITES ATTENDUES DES ACTEURS IMPLIQUES ET LA DISPENSATION DE L'AUTOTEST DE DEPISTAGE DU VIH DANS LE PROJET ATLAS

### a. Résumé du contenu du module 4

**Durée :** 1 jour ½ (12 heures, pauses incluses)

#### **Objectifs**

**pédagogiques :** A l'issue de ce module les participants seront capables :

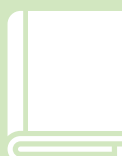

#### **Savoir :**

- Comprendre le lien entre la stratégie de dépistage, le principe de l'ADVIH, son intégration et la dispensation dans le cadre du projet ATLAS.

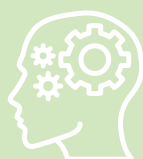

#### **Savoir-faire :**

- Réaliser les formations à destination des différents publics cibles, en fonction des spécificités de chacun d'entre eux.

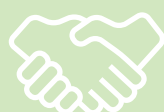

#### **Savoir-être :**

- Adopter une posture de formateur andragogue, véhiculant des valeurs d'écoute active, de conseil, de non-stigmatisation et de non-discrimination.

**Méthodologie :** Exposé, simulation, jeu de rôles et exercices pratiques

**Le module est divisé en 8 séquences et 25 sous-séquences :**

1. Les enjeux et principes fondamentaux pour le dépistage des différentes populations ciblées
  - 1.1 Expliquer les défis liés à la discrimination et la stigmatisation
  - 1.2 Revenir sur les principes fondamentaux pour le dépistage
  - 1.3 Présenter les populations cibles et l'importance du dépistage
2. Les compétences d'écoute active et de conseil
  - 2.1 Etablir le lien entre le conseil et la dispensation de kits d'ADVIH dans le projet ATLAS
  - 2.2 Présenter la posture d'écoute active et de conseil
  - 2.3 Simuler la posture d'écoute active et de conseil dans le cas de la dispensation de kits d'ADVIH
  - 2.4 Synthétiser les enseignements tirés de la pratique de la simulation
3. Les spécificités de dispensation de l'autotest de dépistage du VIH dans le projet ATLAS
  - 3.1 Introduire aux spécificités de dispensation de kits d'ADVIH
  - 3.2 Présenter les aspects éthiques et les implications propres à la notification
  - 3.3 Synthétiser les enseignements tirés de la pratique du brainstorming
  - 3.4 Présenter les différentes modalités de dispensation ATLAS dans la pratique
  - 3.5 Présenter le rôle des écoutants
4. L'importance et les défis du lien vers la confirmation et l'entrée dans les soins
  - 4.1 Expliquer l'objectif final derrière l'acte de dépistage : aller confirmer le diagnostic et commencer un traitement

5. Conseil et messages associés à la dispensation non-assistée de l'autotest de dépistage du VIH OraQuick
  - 5.1 Rappeler les messages clés
  - 5.2 Présenter les consignes
  - 5.3 Mettre en exergue les caractéristiques spécifiques de la dispensation non-assistée en présentiel ou à distance (cas des professionnels de santé et des pairs éducateurs)
  - 5.4 Synthétiser les enseignements
  
6. Conseil et messages associés à la dispensation assistée de kits d'ADVIH
  - 6.1 Présenter les consignes
  - 6.2 Mettre en exergue les caractéristiques spécifiques de la dispensation assistée en présentiel ou à distance (cas des écoutants hotline)
  - 6.3 Synthétiser les enseignements
  
7. Les outils de suivi-évaluation
  - 7.1 Présenter les différents outils
  - 7.2 Tester les outils
  
8. Conclusion
  - 8.1 Revenir sur le matériel de formation des différentes parties prenantes
  - 8.2 Revenir sur des points incompris et clôturer la formation
  - 8.3 Apprécier le niveau de satisfaction des participants selon différents paramètres

b. Fiche pédagogique du module 4

**JOUR 2 – après-midi**

| Horaire | Séquence                                                                       | Objectifs                                                                                | Temps | Méthode                                                                                                                                                                                                                                                                                                                                                                                                                            | Support             | Observations                                                                                                                                                                        |
|---------|--------------------------------------------------------------------------------|------------------------------------------------------------------------------------------|-------|------------------------------------------------------------------------------------------------------------------------------------------------------------------------------------------------------------------------------------------------------------------------------------------------------------------------------------------------------------------------------------------------------------------------------------|---------------------|-------------------------------------------------------------------------------------------------------------------------------------------------------------------------------------|
| 13H30   | Les enjeux et principes fondamentaux pour le dépistage des populations ciblées | Expliquer les défis liés à la discrimination et la stigmatisation                        | 15mn  | Exposé du formateur sur les défis de la discrimination et la stigmatisation.                                                                                                                                                                                                                                                                                                                                                       | PPT (diapo 4 à 7)   | Encourager la réaction des participants et susciter le débat afin qu'ils interviennent pour apporter leur point de vue (mais attention à bien veiller au respect du temps imparti). |
|         |                                                                                | Revenir sur les principes fondamentaux pour le dépistage                                 | 20mn  | <u>Rappel du formateur sur :</u><br>- Les principales barrières d'accès aux services de dépistage et comment l'ADVIH y répond de manière complémentaire<br>- Rappel des 5 C<br>- Rappel de la complémentarité de l'ADVIH par rapport au dépistage classique                                                                                                                                                                        | PPT (diapo 8 à 11)  |                                                                                                                                                                                     |
|         |                                                                                | Présenter les populations cibles et l'importance du dépistage                            | 15mn  | - Rappel du formateur sur l'importance du dépistage auprès des populations cibles du projet ATLAS<br>- Populations clés (HSH/TS/UD)<br>- Partenaires des PVIH et personnes diagnostiquées avec une IST                                                                                                                                                                                                                             | PPT (diapo 12 à 13) |                                                                                                                                                                                     |
| 14H30   | Les compétences d'écoute active et de conseil                                  | Valider l'atteinte des objectifs de la séquence                                          | 5mn   | Avant de passer à la prochaine séquence, demander aux participants s'ils ont des questions et y répondre. Demander aux participants s'ils pensent être en mesure de reproduire cette séquence de formation et s'ils ont des questions par rapport à cet aspect.                                                                                                                                                                    | -                   |                                                                                                                                                                                     |
|         |                                                                                | Etablir le lien entre le conseil et la dispensation de kits d'ADVIH dans le projet ATLAS | 15mn  | Exposé du formateur sur le lien entre le conseil et la dispensation de l'ADVIH dans le projet ATLAS :<br>- Le conseil dans le cas d'une dispensation primaire assistée (professionnels de la santé, pairs éducateurs et écoutants à distance)<br>- Le conseil dans le cas d'une dispensation non assistée (la personne fera le test chez elle) ou pour la distribution secondaire (professionnels de la santé et pairs éducateurs) | PPT (diapo 15 à 16) | Annoncer l'exercice de simulation à venir après la pause-café                                                                                                                       |
|         |                                                                                | Présenter la posture d'écoute active et de conseil                                       | 15mn  | - Le formateur demande aux participants ce qu'ils connaissent de la posture d'écoute active et de la posture de conseil, leurs différences<br>- Le formateur note les réponses et apporte les éléments complémentaires si nécessaires                                                                                                                                                                                              | Flipchart + feutre  | Annoncer l'exercice de simulation à venir après la pause-café.                                                                                                                      |

| Horaire | Séquence                                      | Objectifs                                                                                                         | Temps | Méthode                                                                                                                                                                                                                                                                                                                                                                                                                                                                                                                                                                              | Support                                      | Observations |
|---------|-----------------------------------------------|-------------------------------------------------------------------------------------------------------------------|-------|--------------------------------------------------------------------------------------------------------------------------------------------------------------------------------------------------------------------------------------------------------------------------------------------------------------------------------------------------------------------------------------------------------------------------------------------------------------------------------------------------------------------------------------------------------------------------------------|----------------------------------------------|--------------|
| 15H00   |                                               |                                                                                                                   |       | PAUSE CAFE (30MN)                                                                                                                                                                                                                                                                                                                                                                                                                                                                                                                                                                    |                                              |              |
|         |                                               |                                                                                                                   | 5mn   | Le formateur distribue à l'ensemble des participants la fiche de simulations. Le formateur lit la partie consigne, demande si l'ensemble des participants a compris, si des questions demeurent il y répond.                                                                                                                                                                                                                                                                                                                                                                         | Fiche de simulations (partie consigne)       |              |
|         |                                               |                                                                                                                   | 20mn  | Simulation 1, situation de pré-conseil, avant le dépistage :<br>- Le formateur invite un binôme au centre de la salle pour pratiquer la première simulation. Il lit le scénario de la première simulation, demande si l'ensemble des participants a compris, si des questions demeurent, il y répond<br>- Le formateur rappelle que les autres participants, les observateurs, doivent se référer aux « champs d'observations » pour formuler leurs remarques<br>- Les autres participants observent la simulation et notent leurs commentaires sur un carnet pour en discuter après | Fiche de simulations (partie simulation n°1) |              |
| 15H30   | Les compétences d'écoute active et de conseil | Simuler la posture d'écoute active et de conseil dans le cas de la dispensation de l'autotest de dépistage du VIH | 10mn  | Débriefing de la simulation n°1 : le formateur demande aux observateurs ce qu'ils ont pu noter comme bonne pratique et/ou erreurs commises par les participants en fonction des champs d'observation. Il note les principales observations.                                                                                                                                                                                                                                                                                                                                          | Flipchart + feutre                           |              |
|         |                                               |                                                                                                                   | 20mn  | Simulation 2, situation de pré-conseil, avant le dépistage :<br>- Le formateur invite un binôme au centre de la salle pour pratiquer la deuxième simulation. Il lit le scénario de la deuxième simulation, demande si l'ensemble des participants a compris, si des questions demeurent, il y répond<br>- Le formateur rappelle que les autres participants, les observateurs, doivent se référer aux « champs d'observations » pour formuler leurs remarques<br>- Les autres participants observent la simulation et notent leurs commentaires sur un carnet pour en discuter après | Fiche de simulations (partie simulation n°2) |              |
|         |                                               |                                                                                                                   | 10mn  | Débriefing de la simulation n°2 : le formateur demande aux observateurs ce qu'ils ont pu noter comme bonne pratique et/ou erreurs commises par les participants en fonction des champs d'observation. Il note les principales observations.                                                                                                                                                                                                                                                                                                                                          | Flipchart + feutre                           |              |

| Horaire | Séquence                                      | Objectifs                                                                                                         | Temps | Méthode                                                                                                                                                                                                                                                         | Support            | Observations |
|---------|-----------------------------------------------|-------------------------------------------------------------------------------------------------------------------|-------|-----------------------------------------------------------------------------------------------------------------------------------------------------------------------------------------------------------------------------------------------------------------|--------------------|--------------|
| 15H30   | Les compétences d'écoute active et de conseil | Simuler la posture d'écoute active et de conseil dans le cas de la dispensation de l'autotest de dépistage du VIH | 5mn   | Le formateur procède à la synthèse. Il résume les principaux apprentissages issus des deux débriefings, ce sont les points d'apprentissage à retenir.                                                                                                           | -                  |              |
|         |                                               | Synthétiser les enseignements tirés de la <u>pratique</u> de la simulation                                        | 15mn  | A l'issue de l'exercice de simulation, le formateur demande aux participants quels sont les bonnes pratiques à retenir pour réaliser un exercice de simulations. Il note les principales propositions et complète s'il observe des imprécisions ou des manques. | Flipchart + feutre |              |
|         |                                               | Valider l'atteinte des objectifs de la séquence                                                                   | 5mn   | Avant de passer à la prochaine séquence, demander aux participants s'ils ont des questions et y répondre. Demander aux participants s'ils pensent être en mesure de reproduire cette séquence de formation et s'ils ont des questions par rapport à cet aspect. | -                  |              |
| 17H00   |                                               |                                                                                                                   |       |                                                                                                                                                                                                                                                                 |                    | FIN          |



**JOUR 3**

| Horaire | Séquence                                                                     | Objectifs                                                                  | Temps                                                                                                                                                                                                                         | Méthode                                                                                                                                                                                                                                                                                                                       | Support             | Observations                                                                                                                                                                       |
|---------|------------------------------------------------------------------------------|----------------------------------------------------------------------------|-------------------------------------------------------------------------------------------------------------------------------------------------------------------------------------------------------------------------------|-------------------------------------------------------------------------------------------------------------------------------------------------------------------------------------------------------------------------------------------------------------------------------------------------------------------------------|---------------------|------------------------------------------------------------------------------------------------------------------------------------------------------------------------------------|
| 9H00    | Introduire aux spécificités de dispensation de l'ADVHI                       | 10mn                                                                       | Présentation du formateur sur l'introduction aux spécificités des modalités de dispensation de kits d'ADVHI dans le projet ATLAS.                                                                                             | PPT (diapo 19)                                                                                                                                                                                                                                                                                                                |                     |                                                                                                                                                                                    |
|         |                                                                              |                                                                            |                                                                                                                                                                                                                               |                                                                                                                                                                                                                                                                                                                               |                     |                                                                                                                                                                                    |
|         | Présenter les aspects éthiques et les implications propres à la notification | 15mn                                                                       | Le formateur réalise un exposé sur :<br>- La notification des partenaires des PVVIH, ses implications et sa mise en œuvre dans le cadre du projet ATLAS<br>- Exemples de stratégies pour la notification dans le projet ATLAS | PPT (diapo 20 à 27)                                                                                                                                                                                                                                                                                                           |                     |                                                                                                                                                                                    |
| 10H10   | Les spécificités de dispensation de l'ADVHI dans le projet ATLAS             | Synthétiser les enseignements tirés de la pratique de la simulation        | 15mn                                                                                                                                                                                                                          | A l'issue du brainstorming, le formateur demande aux participants quels sont les bonnes pratiques à retenir pour réaliser un exercice de brainstorming. Il note les principales propositions et complète s'il observe des imprécisions ou des manques.                                                                        | Flipchart + feutre  |                                                                                                                                                                                    |
|         |                                                                              | PAUSE CAFE (30MN)                                                          |                                                                                                                                                                                                                               |                                                                                                                                                                                                                                                                                                                               |                     |                                                                                                                                                                                    |
| 10H40   | Les spécificités de dispensation de l'ADVHI dans le projet ATLAS             | Présenter les différentes modalités de dispensation ATLAS dans la pratique | 30mn                                                                                                                                                                                                                          | Présentation du formateur sur les spécificités de la dispensation ATLAS dans la pratique :<br>- Partenaires PVVIH<br>- Partenaires IST<br>- Populations clés incluant :<br>• HSH, leurs pairs et partenaires<br>• Travailleuses du sexe, leurs partenaires et clients<br>• Usagers et usagers de drogues et leurs partenaires | PPT (diapo 28 à 30) | Encourager la réaction des participants et susciter le débat afin qu'ils interviennent pour apporter leur point de vue (mais attention à bien veiller au respect du temps imparti) |

| Horaire | Séquence                                                                          | Objectifs                                                                                                                                                                 | Temps           | Méthode                                                                                                                                                                                                                                                                                                                                                                                                                                                                                                                                                                                                                                      | Support                                                                        | Observations |
|---------|-----------------------------------------------------------------------------------|---------------------------------------------------------------------------------------------------------------------------------------------------------------------------|-----------------|----------------------------------------------------------------------------------------------------------------------------------------------------------------------------------------------------------------------------------------------------------------------------------------------------------------------------------------------------------------------------------------------------------------------------------------------------------------------------------------------------------------------------------------------------------------------------------------------------------------------------------------------|--------------------------------------------------------------------------------|--------------|
| 10H40   | Les spécificités de dispensation de kits d'ADVIH dans le projet ATLAS             | Présenter le rôle des écouteurs<br><br>Valider l'atteinte des objectifs de la séquence                                                                                    | 10mn<br><br>5mn | Le rôle des écouteurs dans l'accompagnement des usagers et usagers<br><br>Avant de passer à la prochaine séquence, demander aux participants s'ils ont des questions et y répondre. Demander aux participants s'ils pensent être en mesure de reproduire cette séquence de formation et s'ils ont des questions par rapport à cet aspect.                                                                                                                                                                                                                                                                                                    | PPT (diapo 34 à 36)<br><br>-                                                   |              |
| 11H25   | L'importance et les défis du lien vers la confirmation et l'entrée dans les soins | Expliquer l'objectif final derrière l'acte de dépistage : aller confirmer le diagnostic et commencer un traitement<br><br>Valider l'atteinte des objectifs de la séquence | 20mn<br><br>5mn | Exposé du formateur sur :<br>- L'importance et les défis du lien vers la confirmation et l'entrée dans les soins<br>- Les bénéfices du lien vers la confirmation et l'entrée dans les soins pour la personne avec un résultat réactif<br>- Barrières existantes pour assurer l'entrée dans les soins dans le cadre de l'ADVIH et stratégies/outils pour les surmonter<br><br>Avant de passer à la prochaine séquence, demander aux participants s'ils ont des questions et y répondre. Demander aux participants s'ils pensent être en mesure de reproduire cette séquence de formation et s'ils ont des questions par rapport à cet aspect. | PPT (diapo 38 à 41)<br><br>-                                                   |              |
| 11H50   |                                                                                   |                                                                                                                                                                           |                 | PAUSE DEJEUNER (1H)                                                                                                                                                                                                                                                                                                                                                                                                                                                                                                                                                                                                                          |                                                                                |              |
| 12H50   | Conseil et messages associés à la dispensation non-assistée de l'ADVIH            | Rappeler les messages clés<br><br>Présenter les consignes                                                                                                                 | 5mn<br><br>10mn | Le formateur rappelle les messages clés vu lors du module 2 et annonce le jeu de rôle à suivre pour chaque catégorie d'acteurs.<br><br>Le formateur présente les règles de chaque jeu de rôle :<br>- L'ensemble des participants se répartissent en binômes (A) et (B) ;<br>- Le formateur distribue aux participants la fiche pratique « messages clés de dispensation » et les scripts propres à chaque jeu de rôle. Ces scripts précisent le scénario à suivre par chaque binôme.<br>Le formateur demande aux participants s'ils ont des questions de compréhensions.                                                                     | Fiche pratique<br>- Messages clés<br><br>Fiche Jeu de rôle (partie : consigne) |              |

| Horaire | Séquence                                                             | Objectifs                                                                                                                                                                | Temps | Méthode                                                                                                                                                                                                                                                                                                                                                                                                                                                                                       | Support                                                                                                                                                                                                                                                                                  | Observations                                                                                                                                                                                                         |
|---------|----------------------------------------------------------------------|--------------------------------------------------------------------------------------------------------------------------------------------------------------------------|-------|-----------------------------------------------------------------------------------------------------------------------------------------------------------------------------------------------------------------------------------------------------------------------------------------------------------------------------------------------------------------------------------------------------------------------------------------------------------------------------------------------|------------------------------------------------------------------------------------------------------------------------------------------------------------------------------------------------------------------------------------------------------------------------------------------|----------------------------------------------------------------------------------------------------------------------------------------------------------------------------------------------------------------------|
| 12H50   | Conseil et messages associés à la dispensation non-assistée dl'ADVIH | Mettre en exergue les caractéristiques spécifiques de la dispensation non-assistée en présentiel ou à distance (cas des professionnels de santé et des pairs éducateurs) | 25mn  | Jeu de rôle 1, le cas des professionnels de santé et des pairs éducateurs<br>- Certains binômes vont prendre en charge le jeu de rôle n°1 (professionnels de santé) et d'autres vont prendre en charge le jeu de rôle n°2 (par les pairs éducateurs)<br>- Un participant joue (le rôle A) et un autre (rôle B) pendant une dizaine de minutes<br>- A l'issue de ce premier jeu, le binôme intervertit les rôles pour un deuxième jeu d'une dizaine de minute : (A) devient (B) et vice-versa. | Fiche Jeu de rôle (partie : jeux de rôle n°1 et 2)<br>Fiche pratique Messages clés                                                                                                                                                                                                       |                                                                                                                                                                                                                      |
|         |                                                                      |                                                                                                                                                                          |       | 10mn                                                                                                                                                                                                                                                                                                                                                                                                                                                                                          | A l'issue du jeu de rôles, le formateur demande aux binômes les points d'apprentissage qui ressortent de cette expérience.<br>Le formateur note les réponses au fur et à mesure et procède à la synthèse des enseignements généraux et des recommandations à mémoriser.                  | Flipchart + feutre<br>Fiche jeu de rôle (partie débriefing du jeu de rôle n°1 et 2)                                                                                                                                  |
| 13H40   | Conseil et messages associés à la dispensation assistée de l'ADVIH   | Présenter les consignes<br><br>Mettre en exergue les caractéristiques de la dispensation assistée en présentiel ou à distance (cas des écoutants hotline)                | 5mn   | Le formateur présente le second scénario et rappelle que les règles du précédent jeu de rôle sont les mêmes.                                                                                                                                                                                                                                                                                                                                                                                  | Fiche Jeu de rôle (partie : consigne)                                                                                                                                                                                                                                                    |                                                                                                                                                                                                                      |
|         |                                                                      |                                                                                                                                                                          |       | 25mn                                                                                                                                                                                                                                                                                                                                                                                                                                                                                          | <u>Jeu de rôle 3, le cas des écoutants hotline</u><br>- Un participant joue (rôle A) et un autre (rôle B) pendant une dizaine de minutes<br>- A l'issue de ce premier jeu, le binôme intervertit les rôles pour un deuxième jeu d'une dizaine de minute : (A) devient (B) et vice-versa. | Fiche jeu de rôle (partie : jeu de rôle n°3)<br>Fiche pratique Messages clés                                                                                                                                         |
|         |                                                                      |                                                                                                                                                                          | 10mn  | A l'issue du jeu de rôles, le formateur demande aux binômes les points d'apprentissage qui ressortent de cette expérience.<br>Le formateur note les réponses au fur et à mesure et procède à la synthèse des enseignements généraux et des recommandations à mémoriser.                                                                                                                                                                                                                       | Flipchart + feutre<br>Fiche jeu de rôle (partie débriefing du jeu de rôle n°3)                                                                                                                                                                                                           | Faire le parallèle avec la dispensation assistée (professionnel de santé, pair éducateur) si la demande de l'utilisateur est une aide à la réalisation (l'utilisateur ne veut pas faire le test tout seul chez lui). |

| Horaire | Séquence                                                           | Objectifs                                                         | Temps | Méthode                                                                                                                                                                                                                                                                                                                                                                                                                                                                                                       | Support                                                   | Observations |
|---------|--------------------------------------------------------------------|-------------------------------------------------------------------|-------|---------------------------------------------------------------------------------------------------------------------------------------------------------------------------------------------------------------------------------------------------------------------------------------------------------------------------------------------------------------------------------------------------------------------------------------------------------------------------------------------------------------|-----------------------------------------------------------|--------------|
| 13H40   | Conseil et messages associés à la dispensation assistée de l'ADVIH | Synthétiser les enseignements tirés de la pratique du jeu de rôle | 15mn  | A l'issue des jeux de rôles, le formateur demande aux participants quels sont les bonnes pratiques à retenir pour réaliser un tel exercice. Il note les principales propositions et complète s'il observe des imprécisions ou des manques.<br>Avant de passer à la prochaine séquence, demander aux participants s'ils ont des questions et y répondre. Demander aux participants s'ils pensent être en mesure de reproduire cette séquence de formation et s'ils ont des questions par rapport à cet aspect. | Flipchart + feutre                                        |              |
| 14H40   |                                                                    | Valider l'atteinte des objectifs de la séquence                   | 5mn   | PAUSE CAFE (30MN)                                                                                                                                                                                                                                                                                                                                                                                                                                                                                             | -                                                         |              |
| 15H10   | Les outils de suivi-évaluation                                     | Présenter les différents outils                                   | 25mn  | Exposer du formateur sur :<br>- Les principes et objectifs du suivi évaluation ATLAS : Recherche à visée évaluative et Intégration au système de santé<br>- Que cherche-t-on à suivre et évaluer : spécificités du projet ATLAS<br>- La collecte de routine par les professionnels de la santé<br>• Pourquoi ?<br>• Qui collecte quoi ? Présentation des outils<br>• Quand/ A quelle fréquence<br>• Comment (présentation des outils)                                                                         | PPT (diapo 45 à 50)<br>Outils de collecte, cat. 1, 2 et 3 |              |
|         |                                                                    | Tester les outils                                                 | 20mn  | Les participants testent chaque outil en les renseignant un par un.                                                                                                                                                                                                                                                                                                                                                                                                                                           | Outils de collecte, cat. 1, 2 et 3                        |              |
|         |                                                                    | Valider l'atteinte des objectifs de la séquence                   | 5mn   | Le formateur invite les participants à s'exprimer sur l'exercice de renseignement de chaque catégorie d'outils : y-a-t-il des incompréhensions ou des difficultés particulières ?<br>Avant de passer à la prochaine séquence, demander aux participants s'ils ont des questions et y répondre. Demander aux participants s'ils pensent être en mesure de reproduire cette séquence de formation et s'ils ont des questions par rapport à cet aspect.                                                          | -                                                         |              |
|         |                                                                    |                                                                   | 5mn   |                                                                                                                                                                                                                                                                                                                                                                                                                                                                                                               | -                                                         |              |

| Horaire | Séquence   | Objectifs                                                                        | Temps | Méthode                                                                                                                                                                                                                                                                                                                                                                                                                                                                         | Support                            | Observations                                                                                              |
|---------|------------|----------------------------------------------------------------------------------|-------|---------------------------------------------------------------------------------------------------------------------------------------------------------------------------------------------------------------------------------------------------------------------------------------------------------------------------------------------------------------------------------------------------------------------------------------------------------------------------------|------------------------------------|-----------------------------------------------------------------------------------------------------------|
| 16H10   |            | Revenir sur le matériel de formation des différentes parties prenantes           | 15mn  | Le formateur procède à une synthèse de ce qui a été vu au cours des 3 jours de formation et revient sur les 3 kits de formation en rappelant que la dynamique de formation qui a été employée, ainsi que les techniques d'animation et les outils utilisés sont les mêmes que ceux qu'ils devront employer dans les formations. Bien entendu quelques ajustements seront apportés, puisque la formation en andragogie ne sera pas dispensée et que la formation durera 2 jours. | Kits de formation 1, 2 et 3        | Le plus important : prendre le temps de relire les trois déclinaisons de la fiche pédagogique du module 4 |
|         | Conclusion | Revenir sur des points incompris et clôturer la formation                        | 15mn  | Le formateur invite les participants à s'exprimer sur des interrogations, des difficultés ou des craintes qu'ils pourraient avoir, avant de clôturer la formation et souhaitez bonne chance aux apprenants pour la future reproduction de la formation auprès des différents publics cibles.                                                                                                                                                                                    | -                                  |                                                                                                           |
|         |            | Apprécier le niveau de satisfaction des participants selon différents paramètres | 10mn  | Le formateur distribue la fiche d'évaluation aux apprenants qui procède à leur renseignement. Le formateur fera une synthèse des fiches d'évaluation à l'issue de la formation.                                                                                                                                                                                                                                                                                                 | Fiche d'évaluation de la formation |                                                                                                           |
| 16H50   |            |                                                                                  |       | FIN                                                                                                                                                                                                                                                                                                                                                                                                                                                                             |                                    |                                                                                                           |



Les enquêtes menées auprès des prestataires de soins de santé indiquent que les craintes des personnes vivant avec le VIH, et des personnes qui pensent qu'elles pourraient avoir été infectées à VIH, sont souvent fondées. La stigmatisation liée au VIH et les comportements discriminatoires à l'égard des personnes vivant avec le VIH rapportés par les prestataires de soins de santé sont les suivants :

- Refus de prise en charge des personnes vivant avec le VIH.
- Fourniture de soins de moins bonne qualité aux personnes vivant avec le VIH (par rapport aux autres personnes).
- Divulgence du statut VIH sans l'autorisation de la PVVIH.
- Orientation des personnes vivant avec le VIH vers d'autres professionnels de la santé en raison d'un refus de les traiter.

Il est inquiétant de noter que la violence subie par les personnes vivant avec le VIH en raison de leur statut VIH est très répandue dans une grande partie du monde. La violence nuit directement aux personnes vivant avec le VIH, et la menace de la violence les décourage de révéler leur statut VIH à leurs partenaires, à leur famille, aux professionnels de la santé et à la communauté. Cacher sa séropositivité limite les possibilités de recevoir un soutien et des soins vitaux, deux éléments cruciaux pour le déclenchement et l'observance du traitement.

### **La discrimination/stigmatisation à l'égard des populations clés**

Les populations exposées à un risque accru d'infection à VIH font face à des niveaux élevés de stigmatisation en raison, entre autres, de leur sexe, de leur orientation sexuelle, de leur identité de genre, de leur consommation de drogues ou de leur statut de travailleur du sexe.

Des données provenant de nombreux pays montrent qu'un grand nombre de personnes relevant des populations clés évitent le dépistage du VIH. A cela s'ajoute la crainte d'un résultat positif et la stigmatisation future liée au VIH. Nous sommes donc ici face à des enjeux de double discrimination

La stigmatisation des populations clés est renforcée par des lois pénales et d'autres obstacles structurels qui alimentent à leur tour la violence, l'exploitation et un climat de peur entravant les efforts visant à fournir des préservatifs, à réduire les risques et à proposer d'autres méthodes de prévention primaire à des niveaux de couverture suffisants. Souvent, cette violence est exercée en toute impunité, parfois même par les agents de la force publique.

La stigmatisation sociétale à l'égard des populations clés, principalement les travailleurs du sexe, les usagers de drogues, les transgenres et les hommes ayant des rapports sexuels avec des hommes, a conduit à l'adoption, dans de nombreux pays, de législations et politiques criminalisant certaines dispositions à l'encontre de ces populations. Ces dispositions sont nécessairement un frein/une entrave pour ces populations dans l'accès aux programmes de prévention, de dépistage et de prise en charge du VIH.

## Les effets de la stigmatisation et de la discrimination sur l'accès aux soins de santé pour la prévention, le dépistage et le traitement

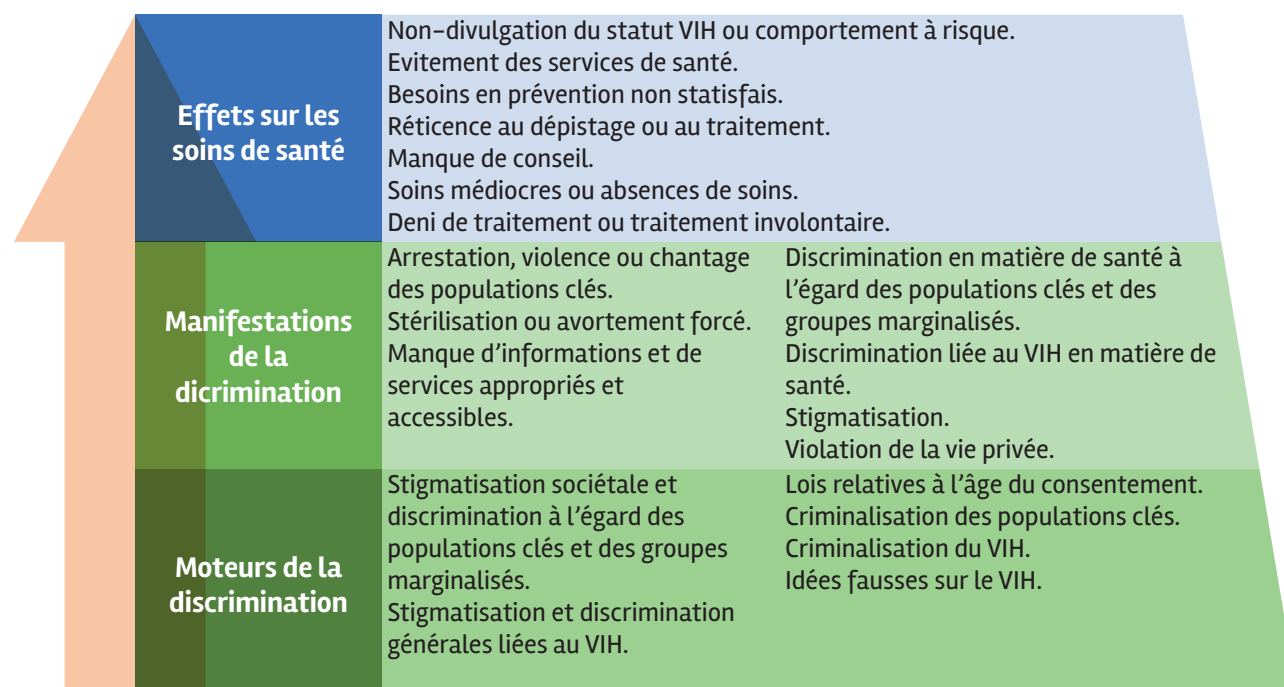

Les lois pénales, les attitudes communautaires, la désinformation, les préjugés et la peur constituent autant de moteurs de la stigmatisation et de manifestations de la discrimination qui affectent l'accès aux soins de santé des personnes vivant avec le VIH et des populations clés.

## L'élimination de la stigmatisation et de la discrimination renforce l'accès aux soins de santé pour la prévention, le dépistage et le traitement

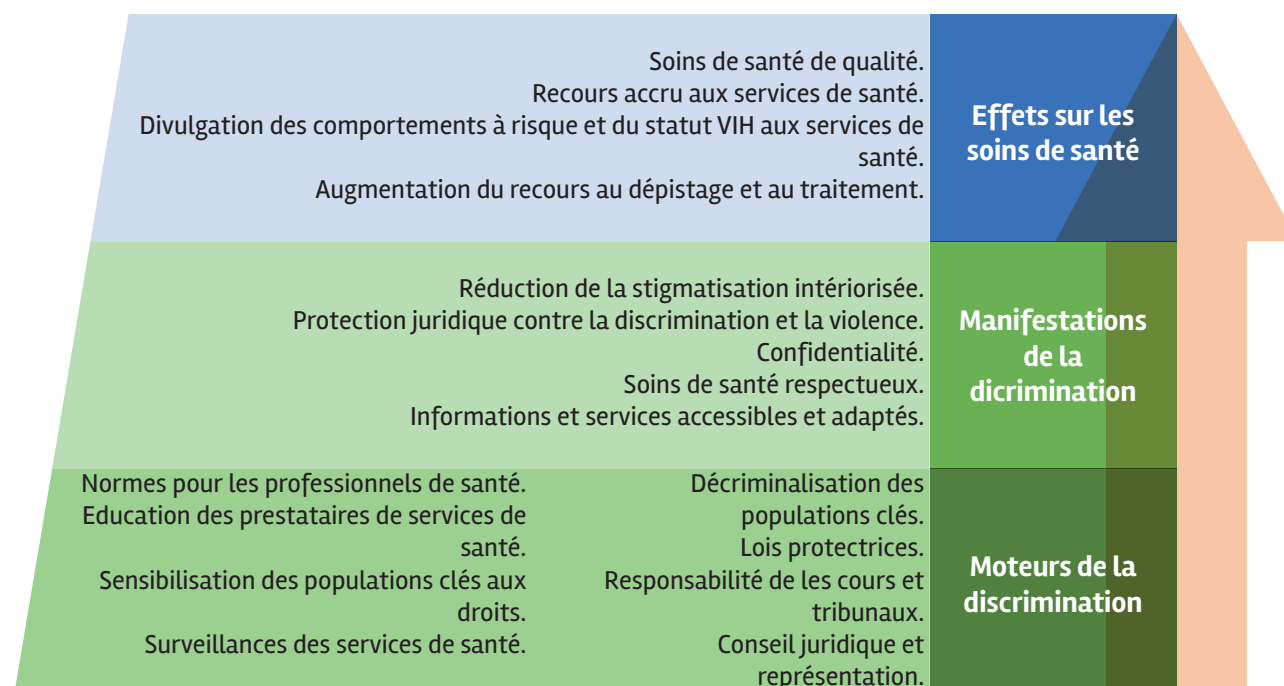

Si l'on s'attaque à ces facteurs, en éliminant les lois néfastes, en introduisant des lois protectrices, en éduquant les détenteurs de droits et les fournisseurs de services et en habilitant les communautés à défendre leurs droits, on peut combler le fossé existant entre ceux qui peuvent accéder aux services et ceux qui ne peuvent pas, favorisant ainsi la santé de tous.



## Eléments clés pour le formateur

- La stigmatisation à l'égard des personnes vivant avec le VIH conduit à des comportements discriminatoires dans tous les secteurs de la société.
- Cela décourage les individus d'accéder aux services de santé, y compris aux méthodes de prévention du VIH, de connaître leur statut VIH, de s'inscrire à des programmes de soin et de suivre leur traitement.
- En ce sens l'auto dépistage offre une réelle alternative pour inviter les personnes à se dépister en toute discrétion. Cependant il est important de rappeler qu'en cas de résultat réactif, la personne devra réaliser un test de confirmation qui se fera dans un centre de dépistage.
- Les populations clés font face à des niveaux élevés de stigmatisation en raison, entre autres, de leur sexe, de leur orientation sexuelle, de leur identité de genre, de leur consommation de drogues ou de leur statut de travailleur du sexe. Cela constitue une double stigmatisation lorsqu'on considère la stigmatisation à l'égard des PVVIH (voir ci-dessus) et des barrières importantes pour le recours aux services de prévention, dépistage et prise en charge du VIH.
- Les lois pénales, les attitudes notamment celles des professionnels de santé, la désinformation, les préjugés et la peur constituent autant de moteurs de la stigmatisation auxquelles il faut s'attaquer afin de promouvoir l'accès aux programmes de lutte contre le VIH et ainsi avoir des bénéfices significatifs en matière de santé à l'échelle du pays.

## Sous-séquence 1.2 : Revenir sur les principes fondamentaux du dépistage

**Durée :** 20 minutes

**Méthode :** En s'appuyant sur la présentation Power Point (PPT) mise à disposition, le formateur revient sur :

- Les principales barrières d'accès aux services de dépistage et comment l'ADVIH y répond de manière complémentaire ;
- Rappel des 5 C ;
- Rappel de la complémentarité de l'ADVIH par rapport au dépistage classique.

**Référentiel technique :**

**Rappel des principales barrières d'accès aux services de dépistage et comment l'ADVIH y répond.**

**En quoi l'autotest réduit les barrières d'accès au dépistage ?**

### **Barrières d'accès au dépistage**

- Temps
- Volonté de discrétion
- Stigmatisation et discrimination
- Transport (coût et disponibilité)
- Attitudes du personnel de santé
- Peur de connaître son statut
- Deni
- Annonce aux proches
- Accessibilité
- Confidentialité

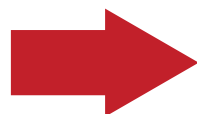

### **Barrières réduites par l'auto dépistage**

- **Temps**
- **Volonté de discrétion**
- **Stigmatisation et discrimination**
- **Transport (coût et disponibilité)**
- **Attitudes du personnel de santé**
- Peur de connaître son statut
- Deni
- Annonce aux proches
- Accessibilité
- **Confidentialité**

**En résumé, les avantages de l'autotest sont :**

- **Rapide** : donne le résultat en 20 minutes
- **Pratique** : pas besoin de se déplacer en centre de santé
- **Favorise l'autonomisation** (empowerment) des personnes
- **Discrétion** – réduit la peur de la stigmatisation
- **Forte acceptabilité** (population générale et populations-clés)
- **Efficace et fiable**
- Permet de **créer la demande pour le dépistage VIH** chez les populations qui n'ont pas accès aux services actuels
- **N'a pas démontré de conséquences sociales et comportementales négatives** (violences, suicide, comportements à risque)

## Rappel des 5 C

Les « 5 C » sont des principes qui s'appliquent à tous les services de dépistage du VIH, en toutes circonstances. Ces principes sont les suivants :

|   |                                     |                                                                                                                                                                                                                                                                                                                                                                                                                                                                                                                         |
|---|-------------------------------------|-------------------------------------------------------------------------------------------------------------------------------------------------------------------------------------------------------------------------------------------------------------------------------------------------------------------------------------------------------------------------------------------------------------------------------------------------------------------------------------------------------------------------|
| 1 | <b>Consentement</b>                 | Pour qu'un conseil et qu'un dépistage du VIH soient réalisés, les personnes qui en bénéficient doivent donner leur consentement éclairé. Elles doivent être informées du processus suivi pour ce conseil et ce dépistage, ainsi que de leur droit à refuser le test. Il est important d'informer les personnes effectuant un ADVIH que le dépistage obligatoire ou coercitif n'est jamais justifié.                                                                                                                     |
| 2 | <b>Confidentialité</b>              | Le dépistage du VIH doit être confidentiel, ce qui signifie que la teneur des discussions entre le prestataire du dépistage et la personne testée ne sera pas divulguée. Le partage de la confidentialité avec un partenaire ou des membres de la famille (c'est-à-dire avec des personnes de confiance), ainsi qu'avec les prestataires de soins, est souvent très bénéfique pour les personnes vivant avec le VIH.                                                                                                    |
| 3 | <b>Conseil</b>                      | Les services d'information avant le test et de conseil après le test peuvent être dispensés dans le cadre d'un groupe, si la situation s'y prête ; cependant, toutes les personnes doivent avoir la possibilité de poser des questions en privé si elles le souhaitent. Lors de tout dépistage du VIH, la personne testée doit bénéficier de conseils de qualité après le test, adaptés aux résultats obtenus.                                                                                                          |
| 4 | <b>Résultats corrects des tests</b> | Les prestataires des tests de dépistage du VIH doivent s'attacher à fournir des services de dépistage de qualité pour garantir l'exactitude du diagnostic obtenu.                                                                                                                                                                                                                                                                                                                                                       |
| 5 | <b>Connexion</b>                    | La liaison avec les services de prévention, de traitement et de soins doit inclure la prestation d'un suivi efficace et approprié.<br>Dans le cadre de l'auto dépistage du VIH, ce principe de connexion comprend également la liaison avec des services de dépistage permettant de réaliser un nouveau test dans un contexte exempt de stigmatisation, au niveau communautaire ou dans un établissement de soins, où les résultats du dépistage peuvent être confirmés et un diagnostic posé par un prestataire formé. |

### Messages clés pour le formateur :

- Le dépistage du VIH doit toujours être réalisé à titre volontaire, confidentiel et gratuit.
- Tous les services de dépistage du VIH, y compris l'auto dépistage, doivent respecter les « 5 C » définis par l'OMS : Consentement, Confidentialité, Conseil, résultats Corrects et Connexion.
- Il est important d'informer les personnes effectuant un autotest de dépistage du VIH que le dépistage obligatoire ou coercitif n'est jamais justifié.

### Rappel de la complémentarité de l'ADVIH par rapport au dépistage classique

L'OMS a officiellement posé la recommandation suivante : **L'autotest de dépistage du VIH devrait être proposé comme approche supplémentaire aux services de dépistage du VIH.**

**L'ADVIH** complète ainsi les offres de dépistage classique. **Il permet de ce fait d'atteindre des populations qui jusque-là n'avaient pas accès au dépistage** du fait notamment des barrières d'accès à la santé comme la discrimination, la stigmatisation, la distance ou le coût.

**L'ADVIH n'a pas vocation à se substituer aux stratégies de dépistages classiques telles que le dépistage en centre de dépistage volontaire ou au dépistage communautaire en stratégie avancée** (utilisation des TRODs). En effet, ces stratégies sont adaptées, performantes et **sont moins coûteuses pour les pays** (un TROD moins cher qu'un ADVIH oral aujourd'hui)

Ainsi, dans le contexte des pays du projet ATLAS au Mali, l'auto dépistage vise à atteindre prioritairement les **populations clés et les plus difficiles à atteindre.**

### **Sous-séquence 1.3 : Présenter les populations cibles et l'importance du dépistage**

**Durée :** 15 minutes

**Méthode :** En s'appuyant sur la présentation Power Point (PPT) mise à disposition, le formateur procède à un rappel sur l'importance du dépistage auprès des populations cibles du projet ATLAS :

- Populations clés (HSH/TS/UD) ;
- Partenaires des PVVIH et personnes diagnostiquées avec une IST .

**Référentiel technique :**

#### **Rappel sur l'importance du dépistage auprès des populations cibles du projet ATLAS**

Comme mentionné précédemment, des gaps dans l'accès au dépistage existent malgré les progrès effectués ces dernières années en Afrique de l'Ouest et l'ADVIH offre une opportunité unique d'atteindre certaines populations qui ne se dépistent pas à ce jour.

Particulièrement l'accès au service de dépistage pour une large proportion des populations clés à savoir les HSH, les travailleuses du sexe et usagers de drogues est insuffisant alors même que les prévalences VIH parmi ces populations sont importantes.

Ainsi il reste un nombre significatif de personnes vivant avec le VIH parmi ces populations qui ne connaissent pas leur statut, ne se soignent pas et ainsi risquent de contaminer d'autres personnes.

Parmi ces populations, certaines sont plus difficile à atteindre car :

- Elles ne fréquentent pas les services de santé notamment du fait de leur stigmatisation/discrimination ;
- Elles ne fréquentent pas les associations de leur communauté ;
- Elles ne se reconnaissent pas elle-même comme faisant partie des populations clés (exemple : travailleuses du sexe occasionnelles, hommes mariés et ayant des relations sexuelles avec les hommes) ;
- Elles ne se reconnaissent pas à risque d'avoir le VIH.

De plus d'autres populations sont des cibles prioritaires du projet ATLAS car elles présentent un risque d'infection à VIH plus important que la population générale à savoir :

- **Les clients des travailleuses du sexe** qui jouent un rôle important dans la dynamique de l'épidémie VIH dans la sous-région ;
- **Les partenaires des PVVIH** qui sont à risque significatif d'être séropositifs du fait du statut de leur partenaire ;
- **Les personnes diagnostiquées avec une maladie sexuellement transmissible et leur partenaire** du fait du risque plus élevé d'avoir le VIH (pour rappel le dépistage VIH est une indication médicale en cas d'infection sexuellement transmissible ;
- **Les partenaires des UD.**

**Avant de clôturer la séquence, le formateur demande aux participants s'ils ont des questions et, le cas échéant, il répond.**

**Demander aux participants s'ils pensent être en mesure de reproduire cette séquence de formation et s'ils ont des questions par rapport à cet aspect.**

|                               |                                                                                                                                                                                                                                                                                                                                                                                                                                                                                                                                      |
|-------------------------------|--------------------------------------------------------------------------------------------------------------------------------------------------------------------------------------------------------------------------------------------------------------------------------------------------------------------------------------------------------------------------------------------------------------------------------------------------------------------------------------------------------------------------------------|
| <b>Séquence n°2</b>           | Les compétences d'écoute active et de conseil.                                                                                                                                                                                                                                                                                                                                                                                                                                                                                       |
| <b>Objectifs pédagogiques</b> | <p>A la fin de cette séquence, les participants auront :</p> <ul style="list-style-type: none"> <li>- Etabli le lien entre le conseil et la dispensation de l'ADVIH dans le projet ATLAS</li> <li>- Compris le principe et l'importance de la posture d'écoute active et de conseil</li> <li>- Simulé la posture d'écoute active et de conseil dans le cas de la dispensation de l'ADVIH</li> <li>- Compris les éléments importants de l'exercice de simulation pour pouvoir le reproduire lors des formations en cascade</li> </ul> |
| <b>Durée</b>                  | 1 heure 40 minutes maximum                                                                                                                                                                                                                                                                                                                                                                                                                                                                                                           |
| <b>Matériel</b>               | <p>Pour réaliser cette séquence, le formateur aura besoin :</p> <ul style="list-style-type: none"> <li>- Du support de présentation PPT</li> <li>- D'un kit de projection (ordinateur, vidéoprojecteur, écran)</li> <li>- D'un flipchart et de feutres de différentes couleurs (noir, rouge, bleu, vert)</li> <li>- De la version papier des supports pour organiser la simulation 1 et 2</li> </ul>                                                                                                                                 |

### **Sous-séquence 2.1 : Etablir le lien entre le conseil et la dispensation de l'ADVIH dans le projet ATLAS**

**Durée :** 15 minutes

**Méthode :** En s'appuyant sur la présentation Power Point (PPT) mise à disposition, le formateur expose le lien entre le conseil et la dispensation de l'ADVIH dans le projet ATLAS :

- Le conseil dans le cas d'une dispensation primaire assistée (professionnels de la santé, pairs éducateurs et écoutants à distance) ;
- Le conseil dans le cas d'une dispensation non assistée (la personne fera le test chez elle) ou pour la distribution secondaire (professionnels de la santé et pairs éducateurs).

#### **Référentiel technique :**

L'ADVIH, par sa nature, ne donne pas systématiquement la possibilité de faire un conseil pré et post dépistage complet comme cela est fait dans un centre ou lors d'un dépistage communautaire (dépistage assisté avant, pendant et après). En effet, si la possibilité d'accompagner la personne existe dans le processus de dépistage (et doit être proposée à la personne comme une option), le TROD sera prioritairement proposé dans ce cadre (Cf. complémentarité ci-dessus).

Ainsi dans la plupart des cas la dispensation se fera avec un conseil en amont du dépistage visant à ce que la personne soit capable de réaliser seule, chez elle, l'auto dépistage.

De surcroit, la principale stratégie de dispensation du projet est secondaire (partenaires/pairs/clients) pour laquelle le conseil ne sera pas apporté par le professionnel de la santé ou le pair éducateur mais par la personne à qui le kit d'ADVIH sera remis (notion de distributeur primaire/relai, cf. canaux de dispensation).

Il y a donc deux types d'approches pour apporter conseil à l'utilisateur de l'ADVIH :

- **Le conseil dans le cas d'une dispensation primaire assistée** (professionnels de la santé, pairs éducateurs et écoutants à distance) qui sera similaire au conseil avant et après tout dépistage du VIH ;
- **Le conseil dans le cas d'une dispensation non assistée** (la personne fera le test chez elle) ou pour la distribution secondaire (professionnels de la santé et pairs éducateurs) qui sera adapté et se concentrera sur le conseil en amont du dépistage. Il est cependant fortement recommandé de proposer à tout usager dans ce cas de ne pas hésiter à solliciter un soutien lorsqu'il aura effectué son auto dépistage.

Dans les deux cas, le professionnel de la santé, le pair éducateur ou l'écouter de la ligne téléphonique devront démontrer des qualités d'écoute et de conseil.

## **Sous-séquence 2.2 : Présenter la posture d'écoute active et de conseil**

**Durée :** 15 minutes

**Méthode :** En s'appuyant sur le référentiel technique mise à disposition et le flipchart :

- Le formateur demande aux participants ce qu'ils connaissent de la posture d'écoute active et de la posture de conseil, leurs différences ;
- Le formateur note les réponses et apporte les éléments complémentaires si nécessaires.

**Référentiel technique :**

### **Éléments pour compléter le brainstorming**

Les qualités du conseil de dépistage :

- *L'écoute (regarder la personne dans les yeux, encourager la personne à parler, communication non verbale) ;*
- *L'empathie (reformulation des propos, être attentif aux signaux non verbaux, poser des questions ouvertes) ;*
- *L'authenticité (être honnête, être soi-même, être à l'aise) ;*
- *L'acceptation inconditionnelle de l'autre (zéro jugement, être attentionné, ne pas contredire, ...) ;*
- *La qualité de la présence (être concret et concentré, ce qui se joue c'est ici et maintenant, poser des questions) ;*
- *La capacité à faciliter l'expression des ressentis du patient (accompagner les émotions) ;*
- *La capacité à donner de nouvelles perspectives (apporter des faits et des données qui permettent au patient de se projeter).*

Le lien avec l'ADVIH :

- *Ces qualités de conseil sont utilisées dans les tests de dépistage rapide s'appliquent dans le cadre de réalisation avec kits d'ADVIH ;*
- *Cependant, on verra par la suite de la formation que l'ADVIH n'est pas nécessairement dans une logique de dispensation assistée, le conseil sera différent et adapté au besoin.*

Les principales qualités du conseil pour la dispensation d'un ADVIH (qu'elle soit assistée ou non assistée) :

- *Soyez à l'écoute, non discriminant/stigmatisant et sans jugement de la personne à qui vous vous adressez quel que soit sa situation ;*
- *Basez-vous sur les besoins, les ressources et les préférences de la personne, laissez-la exprimer ses besoins et ressentis ;*
- *Répondez aux questions honnêtement ;*
- *Soyez structuré dans vos réponses, facilitez la communication et l'échange ;*
- *Reconnaissez que le changement de comportement n'est pas simple et que les personnes ne sont jamais parfaites ;*
- *Soyez positifs et stimulez les questions ;*
- *Soyez dans une posture de soutien à la personne.*

### **Sous-séquence 2.3 : Simuler la posture d'écoute active et de conseil dans le cas de la dispensation de l'ADVIH**

**Durée :** 1 heure 10

**Méthode :** En s'appuyant sur le référentiel technique mise à disposition et le flipchart et le support papier des simulations 1 et 2 (1 support par participant) :

- Le formateur distribue à l'ensemble des participants les la fiche de simulations. Le formateur lit la partie consigne, demande si l'ensemble des participants a compris, si des questions demeurent il y répond.
- Simulation 1, situation de pré-conseil, avant le dépistage :
  - Le formateur invite un binôme au centre de la salle pour pratiquer la première simulation. Il lit le scénario de la première simulation, demande si l'ensemble des participants a compris, si des questions demeurent il y répond ;
  - Le formateur rappelle que les autres participants, les observateurs, doivent se référer aux « champs d'observations » pour formuler leurs remarques ;
  - Les autres participants observent la simulation et notent leurs commentaires sur un carnet pour en discuter après.
- Débriefing de la simulation n°1 : le formateur demande aux observateurs ce qu'ils ont pu noter comme bonne pratique et/ou erreurs commises par les participants en fonction des champs d'observation. Il note les principales observations.
- Simulation 2, situation de post-conseil, après le dépistage :
  - Le formateur invite un binôme au centre de la salle pour pratiquer la deuxième simulation. Il lit le scénario de la deuxième simulation, demande si l'ensemble des participants a compris, si des questions demeurent il répond ;
  - Le formateur rappelle que les autres participants, les observateurs, doivent se référer aux « champs d'observations » pour formuler leurs remarques ;
  - Les autres participants observent la simulation et notent leurs commentaires sur un carnet pour en discuter après.
- Débriefing de la simulation n°2 : le formateur demande aux observateurs ce qu'ils ont pu noter comme bonne pratique et/ou erreurs commises par les participants en fonction des champs d'observation. Il note les principales observations.
- Le formateur procède à la synthèse. Il résume les principaux apprentissages issus des deux débriefings, ce sont les points d'apprentissage à retenir.

### **Sous-séquence 2.4 : Synthétiser les enseignements tirés de la pratique de la simulation**

**Durée :** 15 minutes

**Méthode :** En s'appuyant sur le référentiel technique mise à disposition et le flipchart, le formateur demande aux participants quels sont les bonnes pratiques à retenir pour réaliser un exercice de simulations. Il note les principales propositions et complète s'il observe des imprécisions ou des manques.

**Référentiel technique :**

**Points clés d'apprentissage à mettre en avant dans la conduite d'une simulation :**

- Une simulation tend à répéter les dynamiques d'une situation complexe dans laquelle interagissent des personnes ou des processus ;
- Les simulations ressemblent aux jeux de rôle car là aussi les participants apprennent en faisant et en expérimentant ;
- La grande différence étant que dans la simulation, ils restent eux-mêmes, ils n'endossent pas de rôles déterminés ;
- La méthode est similaire à celle du jeu de rôle.

A noter que dans le cas du jeu de rôles comme de la simulation, il est possible de demander à une partie des participants d'exercer le rôle d'observateur.

**Avant de clôturer la séquence, le formateur demande aux participants s'ils ont des questions et, le cas échéant, il répond.**

**Demander aux participants s'ils pensent être en mesure de reproduire cette séquence de formation et s'ils ont des questions par rapport à cet aspect.**



|                               |                                                                                                                                                                                                                                                                                                                                                                                                                                                                                                                                                                                                                                              |
|-------------------------------|----------------------------------------------------------------------------------------------------------------------------------------------------------------------------------------------------------------------------------------------------------------------------------------------------------------------------------------------------------------------------------------------------------------------------------------------------------------------------------------------------------------------------------------------------------------------------------------------------------------------------------------------|
| <b>Séquence n°3</b>           | Les spécificités de dispensation de l'ADVIH dans le projet ATLAS.                                                                                                                                                                                                                                                                                                                                                                                                                                                                                                                                                                            |
| <b>Objectifs pédagogiques</b> | A la fin de cette séquence, les participants auront : <ul style="list-style-type: none"> <li>- Compris les spécificités de la dispensation de kits d'ADVIH dans le projet ATLAS</li> <li>- Compris les aspects éthiques et les implications propres à la notification</li> <li>- Compris les éléments importants de l'exercice de brainstorming pour pouvoir le reproduire lors des formations en cascade</li> <li>- Compris les différentes modalités de dispensation ATLAS dans la pratique</li> <li>- Compris les différentes modalités de dispensation auprès des jeunes (16-24 ans)</li> <li>- Compris le rôle des écoutants</li> </ul> |
| <b>Durée</b>                  | 2 heures maximum                                                                                                                                                                                                                                                                                                                                                                                                                                                                                                                                                                                                                             |
| <b>Matériel</b>               | Pour réaliser cette séquence, le formateur aura besoin : <ul style="list-style-type: none"> <li>- Du support de présentation PPT</li> <li>- D'un kit de projection (ordinateur, vidéoprojecteur, écran)</li> </ul>                                                                                                                                                                                                                                                                                                                                                                                                                           |

### **Sous-séquence 3.1 : Introduire aux spécificités de dispensation de l'ADVIH**

**Durée :** 10 minutes

**Méthode :** En s'appuyant sur la présentation Power Point (PPT) mise à disposition, le formateur réalise une présentation sur l'introduction aux spécificités des modalités de dispensation de l'ADVIH dans le projet ATLAS.

**Référentiel technique :**

Au-delà du conseil associé à la dispensation de l'ADVIH, il est important de prendre en considération pour les professionnels de la santé et les par les pairs éducateurs certaines spécificités liées au canal de dispensation (pour rappel, 6 canaux, en fonction des populations ciblées). Dans le cadre du projet ATLAS, 3 grandes spécificités sont à noter :

- **Le dépistage des cas index** (1<sup>er</sup> canal du schéma présenté préalablement) qui implique un accompagnement spécifique des PVVIH et des enjeux liés à la notification des partenaires ;
- **Le dépistage basé sur la distribution secondaire** pour lequel l'utilisateur de l'ADVIH ne sera pas la personne conseillée au moment de la dispensation. Ce sera le cas avec les canaux suivants : partenaires des PVVIH (au-delà des enjeux de la notification), partenaires des personnes ayant une IST, partenaires/pairs/clients des populations clés ciblées.

Au-delà des spécificités de dispensation mentionnées, il est important de présenter le rôle des écoutants des lignes téléphonique nationales qui, eux interviendront auprès de n'importe quel usager, avant, pendant ou après le dépistage.

### **Sous-séquence 3.2 : Les aspects éthiques et les implications propres à la notification**

**Durée :** 45 minutes

**Méthode :**

- Les participants se répartissent en groupe de 3 ou 4 personnes ;
- En groupe, ils réalisent un brainstorming et note leurs réponses relatives aux questions suivantes :
  - Quelles sont les aspects éthiques à prendre en compte lors de l'offre de l'ADVIH à un partenaire et lors de la notification de son statut ?
  - Quels sont les implications de la notification ?
- Les participants restituent leurs réflexions, le formateur note les réponses des participants pour chaque question et procède à une synthèse.

En s'appuyant sur la présentation Power Point (PPT), le formateur réalise une présentation :

- La notification des partenaires PVVIH, ses implications et sa mise en œuvre dans le cadre du projet ATLAS ;
- Exemples de stratégies pour la notification dans le projet ATLAS.

## Référentiel technique :

### La notification des partenaires de PVVIH, ses implications et sa mise en œuvre dans le cadre du projet ATLAS

#### Notification du partenaire : quelques définitions

- **Notification passive** : un prestataire formé incite les personnes vivant avec le VIH à divulguer elles-mêmes leur statut à leurs partenaires sexuels ou à leurs partenaires d'injection de drogues, et à suggérer également à ceux-ci de se faire dépister pour le VIH étant donné leur exposition potentielle à l'infection.
- **Notification assistée des partenaires** : un prestataire formé aide des cas index (qui ont signifié leur consentement) à divulguer leur statut ou à notifier anonymement leur exposition à l'infection à VIH à leur(s) partenaire(s) sexuel(s). Le prestataire propose ensuite un dépistage du VIH à ce(s) partenaire(s). La notification assistée des partenaires est effectuée dans le cadre d'une notification par le prestataire, contractuelle ou double.
  - **Notification contractuelle** : la PVVIH a passé avec un prestataire formé un contrat selon lequel il orientera son (ses) partenaire (s) vers des services de dépistage du VIH dans un délai convenu. Une fois celui-ci dépassé, le prestataire contacte le(s) partenaire (s) directement et lui (leur) propose un dépistage volontaire du VIH.
  - **Notification par le prestataire** : avec le consentement de la PVVIH, le prestataire qualifié prend confidentiellement contact avec le(s) partenaire(s) de cette personne et lui (leur) propose un dépistage volontaire du VIH.
  - **Notification double** : le prestataire formé accompagne les PVVIH lorsqu'elles révèlent leur statut à leurs partenaires. Il propose également un dépistage volontaire du VIH à ceux-ci.

#### Objectifs et cadre de la notification dans le projet ATLAS :

- Atteindre les personnes infectées par le VIH et non diagnostiquées qui ont une probabilité accrue d'être séropositives pour le VIH, plus particulièrement les partenaires sexuels des personnes vivant avec le VIH (notion de cas index).

Note pour les participants : Dans le cadre du projet ATLAS au Mali, les partenaires d'autres populations sont ciblées à savoir

- Les partenaires des patients diagnostiqués avec une IST
- Les partenaires des populations clés

Nous ne sommes pas dans le cadre de la notification/cas index même si les enjeux peuvent être similaires dans la dynamique et les implications puisqu'il s'agit pour la personne ciblée d'annoncer à son partenaire qu'il a été diagnostiqué avec une IST ou de l'inviter à se dépister.

La loi VIH et les stratégies VIH de votre pays inscrit la notification des partenaires des personnes vivant avec le VIH comme une pratique recommandée /obligatoire.

#### Les avantages de la notification assistée :

- La notification assistée des partenaires est un moyen simple et efficace d'atteindre ces personnes qui, bien souvent, ne sont ni diagnostiquées, ni conscientes de leur exposition au VIH et pourraient accueillir positivement un soutien et la possibilité de se faire dépister pour le VIH.
- Depuis des décennies, la notification assistée des partenaires est une importante approche de santé publique pour la prise en charge des maladies infectieuses, notamment dans les programmes de lutte contre les IST et la tuberculose, mais elle n'a pas été systématiquement appliquée pour les personnes vivant avec le VIH.
- La notification assistée des partenaires peut :
  - Renforcer le recours aux services de dépistage du VIH des partenaires des personnes vivant avec le VIH.

- Augmenter la proportion de nouveaux cas diagnostiqués chez les personnes vivant avec le VIH.
- Orienter davantage de partenaires de personnes vivant avec le VIH vers les services de traitement et de soins.
- La notification assistée des partenaires améliore le recours au dépistage du VIH et permet, par rapport à l'orientation passive, d'établir davantage de nouveaux diagnostics dans la population vivant avec le VIH. Cela étant, l'orientation passive peut, elle aussi, inciter les partenaires des personnes vivant avec le VIH à se faire dépister.
- Le(s) partenaire(s) ne devrai(en)t être notifié(s) qu'avec le consentement de la PVVIH, et être la (les) seule(s) personne(s) avertie(s).
- Le dépistage du VIH chez les partenaires et au sein des couples présente d'autres avantages :
  - Soutien mutuel pour l'accès aux services de prévention, de traitement et de soins du VIH ;
  - Amélioration de l'observance et de la poursuite du traitement antirétroviral ;
  - Appui renforcé pour la prévention de la transmission de la mère à l'enfant ;
  - Priorité donnée à la prévention efficace du VIH chez les couples séro-discordants (utilisation du préservatif, traitement antirétroviral et prophylaxie post exposition chez les partenaires négatifs pour le VIH).

Les préférences concernant la méthode de notification du partenaire varient selon la population, l'âge (notamment chez les jeunes) et le type de partenaire (principal ou occasionnel).

La notification assistée du partenaire peut prendre différentes formes : conversation en face à face, lettre, appel téléphonique, message texte (SMS), vidéo, courriel et système de messagerie Internet. Il faut veiller à ce que la bonne personne reçoive le message et à préserver l'anonymat du patient vivant avec le VIH et du partenaire notifié.

### Approches de l'offre de services de notification aux partenaires pour le VIH

| Services de notification assistée aux partenaires (notification par le prestataire, notification contractuelle ou notification double)                                                                                                                                                                                                                                                                                                                                                                                                                                                                                                                      | Services de notification passive des partenaires                                                                                                                                                                                                                                                                                                                                                                                                                                                                                                                                                                                                                                                                      |
|-------------------------------------------------------------------------------------------------------------------------------------------------------------------------------------------------------------------------------------------------------------------------------------------------------------------------------------------------------------------------------------------------------------------------------------------------------------------------------------------------------------------------------------------------------------------------------------------------------------------------------------------------------------|-----------------------------------------------------------------------------------------------------------------------------------------------------------------------------------------------------------------------------------------------------------------------------------------------------------------------------------------------------------------------------------------------------------------------------------------------------------------------------------------------------------------------------------------------------------------------------------------------------------------------------------------------------------------------------------------------------------------------|
| <ul style="list-style-type: none"> <li>- Le prestataire donne des conseils et propose une assistance aux PVVIH pour la divulgation et la notification à leurs partenaires de leur statut sérologique en employant l'une des trois méthodes de notification.</li> <li>- Le prestataire contacte les partenaires par téléphone, Internet, courriel ou visite à domicile pour les informer de leur exposition potentielle à une infection par le VIH et leur propose des services de dépistage du VIH.</li> <li>- Le prestataire offre des services de dépistage du VIH à domicile pour l'ensemble du foyer (partenaires et membres de la famille).</li> </ul> | <ul style="list-style-type: none"> <li>- Le prestataire donne des conseils et encourage les PVVIH à divulguer leur statut sérologique à leurs partenaires et à les informer de leur exposition possible au VIH, soit en personne, soit par téléphone, SMS, courriel, etc.</li> <li>- Le prestataire remet aux PVVIH une lettre ou une fiche invitant leurs partenaires à se rendre dans un établissement de santé. Quand les partenaires se présentent à l'établissement de santé, des services de dépistage du VIH leur sont proposés.</li> <li>- Les PVVIH peuvent recourir à des services de messagerie anonyme, comme le téléphone, le courriel ou Internet pour informer eux-mêmes leurs partenaires.</li> </ul> |

### La notification du partenaire et conséquences dommageables

- **Les essais contrôlés randomisés et les études d'observation ont rapporté peu d'exemples de conséquences** dommageables consécutives à une notification passive ou assistée des partenaires dès lors qu'elle respecte le principe de consentement de la PVVIH.
- **La confidentialité et la participation volontaire sont des principes essentiels**, en particulier au cas où les partenaires ne se sont pas encore mutuellement révélés leur statut VIH.
- **Les responsables de la mise en œuvre de la notification doivent être conscients des conséquences dommageables possibles d'une divulgation du statut VIH**, mais il faut aussi considérer les avantages du diagnostic précoce et de l'orientation vers le traitement des personnes séropositives pour le VIH.

- **Ceux qui proposent des services de notification du partenaire doivent discuter des risques de conséquences dommageables avec les patients recevant un diagnostic de VIH.** Si la sécurité du patient n'est pas menacée, des services de notification volontaire du partenaire doivent être proposés.

### Facteurs de succès

- **Manière de discuter par les professionnels de santé** des partenaires sexuels sans porter de jugement, à la manière de faciliter la divulgation mutuelle pour les couples et aux moyens de localiser les partenaires occasionnels. Pour suivre les résultats, il faut que les tentatives de notification des partenaires, le recours au dépistage du VIH, les résultats des tests et l'orientation vers les soins des partenaires soient consignés dans les dossiers sur les patients index.
- **Offrir un choix.** Différentes possibilités de notification du partenaire doivent être laissées au choix de la PVVIH (qui doit également pouvoir refuser cette possibilité). Par exemple, un sujet vivant avec le VIH peut souhaiter employer une approche passive pour certains partenaires, qu'il se sent prêt à avertir lui-même, et préférer que ce soit le prestataire qui prenne contact avec d'autres.
- **Proposer périodiquement la notification des partenaires.** À partir du moment où l'infection à VIH est décelée, une notification assistée des partenaires peut être proposée à différents moments, tout au long du parcours du patient dans le système de santé. Les évaluations peuvent être répétées lors des visites de suivi semestrielles ou annuelles, car la propension de la personne à consentir aux services de notification des partenaires peut évoluer au fil du temps.
- **Ne pas pratiquer de notifications obligatoires ou coercitives et éviter les attitudes et comportements qui stigmatisent et discriminent** les personnes issues de groupes de population clés et les personnes vivant avec le VIH.

### Messages clés pour le formateur :

- La notification des partenaires des PVVIH peut être faite de manière passive (sans aide) ou assistée (avec aide du professionnel de santé).
- La notification assistée des partenaires améliore le recours au dépistage et est un moyen simple et efficace d'atteindre les partenaires des PVVIH. Les études d'observation ont rapporté peu d'exemples de conséquences dommageables consécutives à une notification passive ou assistée des partenaires.
- La confidentialité et la participation volontaire sont des principes essentiels, en particulier au cas où les partenaires ne se sont pas encore mutuellement révélés leur statut VIH.
- Il faut offrir le choix à la PVVIH des possibilités de notification et la proposer périodiquement si elle n'est pas prête au moment de la découverte de son statut.
- Il ne faut pas pratiquer de notification obligatoires ou coercitives sans consentement de la PVVIH et éviter les attitudes et comportements qui stigmatisent et discriminent.

### Exemples de stratégies pour la notification dans le projet ATLAS

Dans le cadre du projet ATLAS, plusieurs méthodes de notification seront utilisées. En voici quelques exemples :

**Notification passive** par manque d'outils/ressources (crédit téléphone, internet, visites à domicile etc...) mais qui peut cependant s'avérer efficace si elle est correctement conduite par les professionnels de la santé.

**Notification assistée et plus particulièrement double** avec l'accompagnement de la personne vivant avec le VIH au domicile quand elle en ressent le besoin. Certains partenaires s'appuieront en effet sur les réseaux communautaires existants (médiateurs PVVIH, agents d'associations communautaires) afin d'accompagner la personne et ainsi proposer l'ADVIH comme moyen de dépistage si tant est que le, la partenaire ne désire pas se rendre au centre de dépistage.

### **Sous-séquence 3.3 : Synthétiser les enseignements tirés de la pratique du brainstorming**

**Durée :** 15 minutes

**Méthode :** En s'appuyant sur le référentiel technique mis à disposition et le flipchart, le formateur demande aux participants quels sont les bonnes pratiques à retenir pour réaliser un exercice de brainstorming. Il note les principales propositions et complète s'il observe des imprécisions ou des manques.

**Référentiel technique :**

**Points clés à retenir pour la réalisation du brainstorming :**

- Les brainstormings représentent une manière simple et efficace de générer des idées et des suggestions ;
- Les idées trouvées grâce à un brainstorming ou une discussion peuvent varier en qualité, pertinence, précision ou intérêt ;
- A l'issue d'un brainstorming, il est indispensable de classer et mettre en priorité les idées.

### **Sous-séquence 3.4 : Présenter les différentes modalités de dispensation ATLAS dans la pratique**

**Durée :** 30 minutes

**Méthode :** En s'appuyant sur la présentation Power Point (PPT) mise à disposition, le formateur réalise une présentation sur les spécificités de la dispensation ATLAS dans la pratique :

- Partenaires PVVIH ;
- Partenaires IST ;
- HSH, leurs pairs et partenaires ;
- Travailleuses du sexe, leurs partenaires et clients ;
- Usagère et usagers de drogues et leurs partenaires.

**Référentiel technique :**

**Dépistage des Cas Index : Distribution secondaire pour les partenaires des PVVIH**

Comme nous venons de le voir précédemment il s'agira, à travers les consultations ARV où la PTME, pour les professionnels de santé, d'accompagner la PVVIH afin de dépister son/sa/ses partenaire(s) en proposant notamment l'ADVIH (dans le cas où les partenaires ne désirent pas venir jusqu'au centre pour se dépister).

**Important :** la PVVIH n'est pas bénéficiaire de l'ADVIH (elle connaît son statut et risque si elle est sous ARV d'avoir un résultat faux négatif).

Modalités concrètes : en fonction des contextes, notification passive ou assistée/double (voir ci-dessus)

**Important :**

- Dans le cas d'une notification passive, le professionnel de la santé pourra/devra suivre auprès de la PVVIH si le/la/les partenaire.s a utilisé l'ADVIH lors d'une consultation ultérieure et s'assurer que si le résultat était réactif, le lien vers le test de confirmation est fait.
- Dans le cas d'une notification assistée/double, de la même manière, le professionnel de la santé pourra suivre auprès de la PVVIH si le/la/les partenaire.s a utilisé l'ADVIH lors d'une consultation ultérieure (l'ADVIH ne sera pas nécessairement fait au moment de la notification) ou s'appuiera sur les potentiels réseaux communautaires existants.

## **Dépistage lors des consultations IST : distribution secondaire pour les partenaires des personnes diagnostiquées avec une IST mais aussi une offre alternative pour le patient ayant une IST (distribution primaire)**

Lors d'une consultation, le professionnel de la santé doit proposer à la personne diagnostiquée avec une IST un dépistage du VIH (c'est une indication médicale car le risque de séropositivité est plus élevé).

- En général le dépistage se fait au sein du centre dans lequel la consultation IST est effectuée et l'offre de dépistage se fait donc dans le centre de santé.
- L'ADVIH ici vise essentiellement à offrir l'opportunité pour le partenaire de la personne ayant une IST à se dépister. La cible première est donc le partenaire.
- Le conseil apporté expliquera donc l'importance pour le partenaire d'effectuer aussi un dépistage VIH et reprendra l'ensemble des messages clés afin de s'assurer que le patient soit en capacité de proposer l'ADVIH à son partenaire qui sera en mesure de réaliser correctement le test, d'interpréter son résultat et de s'orienter, en fonction de celui-ci vers les services adaptés.
- La promotion des outils disponibles telles la notice, la brochure complémentaire, la vidéo de démonstration et la ligne téléphonique nationale est essentielle.

Dans le cas où la personne présente à la consultation et diagnostiquée avec une IST ne désire pas faire le dépistage dans le centre, l'ADVIH peut lui être proposé afin qu'elle se dépiste chez elle (avec le partenaire).

Concrètement, il y a la possibilité de donner 1 ADVIH pour le/la partenaire de la personne diagnostiquée avec une IST ou 2 ADVIH pour le/la partenaire et le/la patient(e).

## **Dépistage des populations clés (Hommes ayant des relations sexuelles avec des hommes, usagers de drogue et travailleuses du sexe) :**

### **Rappel des populations clés dans le cadre du projet ATLAS :**

#### Les HSH dans le projet ATLAS

Nous comprenons dans le cadre du projet ATLAS par HSH, les hommes ayant des relations sexuelles avec des hommes (avec ou sans transaction financière) et les personnes transgenres.

Les cibles prioritaires du projet ATLAS en lien avec les HSH sont pour rappel :

- Leurs partenaires (homme ou femme) ;
- Leurs potentiels clients (dans le cas où il y a des relations avec transaction) ;
- Leurs amis/pairs cachés ne fréquentant pas les associations communautaires ou les services de santé.

#### Les professionnelles /travailleuses du sexe dans le projet ATLAS

Nous comprenons dans le cadre du projet ATLAS par professionnelles du sexe/travailleuses du sexe, les femmes ayant des relations sexuelles avec transaction (financière ou non). Cela comprend ainsi les travailleuses régulières qu'elles soient déclarées et fixes ou qu'elles soient clandestines, que leur activité soit régulière ou occasionnelle (étudiantes, vendeuses ambulantes, etc.).

Les cibles prioritaires du projet ATLAS en lien avec les professionnelles du sexe/travailleuses du sexe sont donc :

- Leurs partenaires ;
- Leurs clients ;
- Leurs amis/pairs cachés ne fréquentant pas les associations communautaires ou les services de santé.

#### Les usagères et usagers de drogues :

Nous comprenons dans le cadre du projet ATLAS par consommateurs de drogues injectables, les personnes consommant des produits stupéfiants qu'elles se les injectent ou pas. En effet, au-delà du risque de contamination par l'échange de seringues souillées, la consommation de stupéfiant engendre souvent d'autres comportements présentant des risques de contamination au VIH (relations sexuelles non protégées).

Les cibles prioritaires du projet ATLAS en lien avec les UD sont donc :

- Leurs partenaires ;
- Leurs amis/pairs cachés ne fréquentant pas les associations communautaires ou les services de santé.

## Modalités de dispensation

- L'ADVIH ici vise principalement à offrir l'opportunité pour le.s partenaire.s et/ou amis/pairs qui ne fréquentent pas les associations communautaires et/ou les clients de la personne à qui le.s ADVIHs vont être dispensés.
- Le conseil apporté expliquera donc clairement pour qui les kits d'ADVIH sont destinés (élément très important afin que les ADVIH atteignent bien les personnes à haut risque d'infection), l'intérêt pour ces personnes d'effectuer un dépistage VIH.
- Il reprendra l'ensemble des messages clés afin de s'assurer que la personne relai soit en capacité de proposer l'ADVIH à ses son/sa/ses partenaire/amis/pairs/clients qui seront en mesure de réaliser correctement le test, d'interpréter leur résultat et de s'orienter, en fonction de celui-ci vers les services adaptés. La promotion des outils disponibles tels la notice, la brochure complémentaire, la vidéo de démonstration et la ligne téléphonique nationale est essentielle.
- La personne relai à qui les ADVIHs seront dispensés, s'il/elle ne désire pas se dépister dans un centre ou lors de l'activité en utilisant le dépistage classique (par confort ou pour des raisons de discrétion) se verra aussi offrir la possibilité d'utiliser l'ADVIH. En effet, même si cette personne n'est pas la cible prioritaire, cette option doit être considérée afin de s'assurer que les autres ADVIHs atteignent bien les personnes à risque difficiles à atteindre.
- Dans la pratique, et en fonction de la personne, le nombre d'ADVIHs dispensé peut varier de 1 (pour la personne elle-même) à 4 ou 5 en fonction de la situation de la personne (existence d'un partenaire, réseau social développé avec connaissance d'amis (ne fréquentant pas les associations communautaires ou centres de santé) qui pourraient bénéficier de l'ADVIH) et/ou clients.

**Important :** Il n'y a donc pas de quantité définie même si l'objectif prioritaire est d'atteindre les populations cachées/difficiles à atteindre en complémentarité des stratégies de dépistage classique. **Ainsi la dispensation d'un seul d'ADVIH à la personne relai n'est pas à privilégier puisqu'il s'agirait de remplacer les méthodes de dépistage classique par l'ADVIH ce qui n'est pas l'objectif du projet.**

Il n'y a pas a priori de quantité maximale à dispenser. Cependant il est important de ne pas donner trop d'ADVIHs à une même personne pour éviter une mauvaise utilisation de ceux-ci.

Il est recommandé de commencer une première fois avec 3-4 ADVIHs maximum, de discuter par la suite avec la personne comment la distribution à ses partenaires/pairs/clients s'est passée et en fonction de cela, d'envisager d'augmenter les quantités distribuées par cette personne relai au contact suivant (la personne deviendra un.e « ambassadeur » et sera notamment plus à l'aise pour apporter les conseils nécessaires à la dispensation de l'ADVIH).

**Dans tous les cas il n'est pas recommandé de dispenser plus de 6-7 ADVIH à une même personne.**

### Sous-séquence 3.5 : Présenter le rôle des écoutants

**Durée :** 10 minutes

**Méthode :** En s'appuyant sur la présentation Power Point (PPT) mise à disposition, le formateur réalise une présentation sur le rôle des écoutants dans l'accompagnement des usagères et usagers.

**Référentiel technique :**

#### **Le rôle des écoutants des lignes téléphoniques nationales**

- Les écoutants interviendront auprès de n'importe quelle usagère et usager, avant, pendant ou après le dépistage.
- Le conseil apporté s'adaptera donc au motif de l'appel qui pourra être varié et s'efforcera, au-delà de la réponse à la question, d'engager le dialogue avec la personne afin de pouvoir l'accompagner sur l'ensemble du processus.

Par exemple une personne qui appellerait car elle vient de recevoir l'ADVIH mais ne sait pas comment s'y prendre se verra offrir un accompagnement complet comprenant le conseil avant le dépistage, une aide à la réalisation du test (motif de l'appel), une aide pour interpréter le résultat, un conseil après le dépistage adapté au résultat et une orientation vers le service adapté.

- Ils pourront aussi être à l'écoute de personnes appelant suite à des conséquences négatives ou des mauvaises pratiques en lien avec la distribution de l'ADVIH telles que les violences au sein d'un couple ou avec un client, des personnes appelant car elles ont été forcées à faire le dépistage, un appel mentionnant que des ADVIH se retrouvent en vente dans les marchés etc.
- Les écoutants sont déjà expérimentés sur les questions relatives au VIH, à la santé reproductive et sexuelle et à l'orientation des appelants (liste de services de référence à disposition). Dans le cadre du projet ATLAS, ils sauront s'appuyer sur ces acquis afin d'accompagner les usagères et usagers à la spécificité de l'ADVIH.
- Comme pour les professionnels de la santé et les pairs éducateurs, il reprendra l'ensemble des messages clés afin de s'assurer que la personne relai soit en capacité de faire la promotion des outils disponibles tels la notice, la brochure complémentaire, la vidéo de démonstration et la ligne téléphonique nationale sera importante et l'aidera dans son accompagnement.
- Cependant, il aura l'avantage, même si cela se fera à distance/au téléphone d'être dans une posture de dispensation assistée de l'ADVIH ce qui lui permettra d'expliquer chaque étape de réalisation du test avec l'usagère et l'usager et de pouvoir l'accompagner sur l'ensemble du processus.
- Il est à noter que les écoutants ne seront pas amenés à suivre les usagères et usagers après que les conseils d'orientation vers les services adaptés ont été proposés. Ce rôle sera assuré, quand cela est possible par les professionnels de la santé ou les pairs éducateurs, voir les personnes relais de la dispensation de kits d'ADVIH.
- Par ailleurs une enquête téléphonique (menée par une autre plateforme téléphonique gratuite) sera conduite par vague (sur des périodes définies) au cours du projet ATLAS. Un autocollant adjoint à la brochure complémentaire sera collé pour inviter les usagères et usagers à participer. L'écoutant, sur ces périodes précises d'enquête, sera amené à encourager les personnes à participer à l'étude qui sera très importante pour évaluer l'efficacité et l'impact de la dispensation de kits d'ADVIH dans le pays.

#### **Pour résumer, les principaux rôles de l'écoutant seront ainsi :**

- L'aide à la réalisation de l'autotest incluant le pré conseil ;
- L'aide à l'interprétation des résultats et le post conseil ;
- L'importance du référencement vers les services de santé adaptés et l'orientation vers le service le plus proche/choisi par la personne ;
- Les questions et réponses autour de l'autotest ou du VIH ;
- La remontée des conséquences négatives et mauvaises pratiques observées en lien avec la dispensation de l'autotest ;
- La promotion/l'encouragement des personnes à participer à l'étude du projet ATLAS sur les périodes définies.

**Avant de clôturer la séquence, le formateur demande aux participants s'ils ont des questions et, le cas échéant, il répond.**

**Demander aux participants s'ils pensent être en mesure de reproduire cette séquence de formation et s'ils ont des questions par rapport à cet aspect.**



|                               |                                                                                                                                                                                                    |
|-------------------------------|----------------------------------------------------------------------------------------------------------------------------------------------------------------------------------------------------|
| <b>Séquence n°4</b>           | L'importance et les défis du lien vers la confirmation et l'entrée dans les soins.                                                                                                                 |
| <b>Objectifs pédagogiques</b> | A la fin de cette séquence, les participants auront :<br>– Compris l'objectif final derrière l'acte de dépistage, à savoir l'importance d'aller confirmer le diagnostic et commencer un traitement |
| <b>Durée</b>                  | 25 minutes maximum                                                                                                                                                                                 |
| <b>Matériel</b>               | Pour réaliser cette séquence, le formateur aura besoin :<br>– Du support de présentation PPT<br>– D'un kit de projection (ordinateur, vidéoprojecteur, écran)                                      |

#### **Sous-séquence 4.1 : Expliquer l'objectif final derrière l'acte de dépistage : aller confirmer le diagnostic et commencer un traitement**

**Durée :** 20 minutes

**Méthode :** En s'appuyant sur la présentation Power Point (PPT) mise à disposition, le formateur réalise un exposé sur :

- L'importance et les défis du lien vers la confirmation et l'entrée dans les soins ;
- Les bénéfices du lien vers la confirmation et l'entrée dans les soins pour la personne avec un ADVIH réactif ;
- Barrières existantes pour assurer l'entrée dans les soins dans le cadre de l'ADVIH et stratégies/outils pour les surmonter.

#### **Référentiel technique :**

Comme déjà souligné, l'ADVIH facilite le recours au dépistage mais cela n'est pas une finalité en soi. En effet, il est crucial qu'une fois l'auto dépistage réalisé par la personne et au regard du résultat, elle puisse s'orienter vers les services adaptés à sa situation.

Plus particulièrement, lorsque le résultat est réactif, il est indispensable que la personne confirme son statut avec un test supplémentaire et entre dans les soins le cas échéant.

#### **IMPORTANT :**

C'est uniquement dans ce cas que le bénéfice du dépistage/de l'auto dépistage est réel car la personne qui connaît son statut de manière précoce, a accès aux soins et observe son traitement verra sa charge virale fortement réduite voire indétectable.

La personne sera ainsi en meilleure santé et représentera un risque significativement moindre voire nul de contaminer d'autres personnes.

#### **Les bénéfices du lien vers la confirmation et l'entrée dans les soins pour l'utilisateur avec un kit d'ADVIH réactif**

Ces bénéfices peuvent être mis en avant par les professionnels de la santé, les pairs éducateurs et les écoutants peuvent promouvoir le recours au test de confirmation et l'entrée dans les soins :

- L'utilisateur avec un 'ADVIH réactif est peut-être séropositive. Un test supplémentaire est nécessaire pour confirmer le statut. Ne pas y recourir maintient la personne dans le doute et la crainte de son statut ;
- L'utilisateur, lorsque le test est confirmé :
  - Est alors capable de prendre des décisions éclairées sur sa vie
  - Bénéficie de conseils et de soutien émotionnel/psychosocial
  - Bénéficie d'un accompagnement pour accepter sa situation et en parler avec ses proches
  - A accès au traitement ARV qui améliore sa qualité de vie
  - Réduit son risque de contaminer d'autres personnes

## **Barrières existantes pour assurer l'entrée dans les soins dans le cadre de l'ADVIH et stratégies/outils pour les surmonter**

Deux barrières principales pour promouvoir le lien vers le test de confirmation et l'entrée dans les soins après une auto-dépistage réactif existent :

- Dans le cas d'auto-dépistage réalisé par une personne seule à la maison, le conseil après le dépistage qui permet d'accompagner la personne et d'expliquer l'importance du test de confirmation et de l'entrée dans les soins ne peut être réalisé (sauf si celle-ci a recours à la ligne téléphonique gratuite) ;
- Les phénomènes de stigmatisation et discrimination, barrières d'accès aux services de santé et présentés précédemment s'appliquent nécessairement puisque le test de confirmation devra se faire en centre de dépistage/santé.

Ces deux éléments devront être ainsi pris en compte lors de la dispensation de l'ADVIH par les professionnels de santé, les pairs éducateurs et les écoutants de la ligne téléphonique gratuite :

- En insistant sur l'importance du lien vers le test de confirmation et les bénéfices pour la personne au moment de la dispensation et en sensibilisant les distributeurs relais (pour la distribution secondaire) de passer ce message aux usagers secondaires ;
- En ayant soi-même une attitude non stigmatisante/discriminante au moment de la dispensation de l'ADVIH ;
- En dispensant l'ADVIH en respect des règles d'écoute active et de conseil abordées précédemment ;
- En faisant la promotion des outils à disposition (notice, brochure complémentaire, vidéo de démonstration) qui rappelle l'importance d'effectuer un test de confirmation ;
- En rappelant que sur la brochure complémentaire et sur le site internet ATLAS, une liste de services est disponible ;
- Pour les professionnels de santé et éducateurs pairs, en invitant systématiquement la personne à appeler la ligne téléphonique pour se faire aider et accompagner ;
- Pour les professionnels de santé et éducateurs pairs, en proposant d'être contacté par la personne après le résultat s'il s'avère réactif ou s'appuyer sur les éventuels réseaux communautaires existants.

**Avant de clôturer la séquence, le formateur demande aux participants s'ils ont des questions et, le cas échéant, il répond.**

**Demander aux participants s'ils pensent être en mesure de reproduire cette séquence de formation et s'ils ont des questions par rapport à cet aspect.**

|                               |                                                                                                                                                                                                                                                                                               |
|-------------------------------|-----------------------------------------------------------------------------------------------------------------------------------------------------------------------------------------------------------------------------------------------------------------------------------------------|
| <b>Séquence n°5</b>           | Conseil et messages associés à la dispensation non-assistée de l'ADVIH.                                                                                                                                                                                                                       |
| <b>Objectifs pédagogiques</b> | A la fin de cette séquence, les participants auront :<br>- Revu les messages clés à transmettre lors de la dispensation de l'ADVIH<br>- Compris les caractéristiques spécifiques de la dispensation non-assistée en présentiel ou à distance, par une mise en situation lors d'un jeu de rôle |
| <b>Durée</b>                  | 50 minutes maximum                                                                                                                                                                                                                                                                            |
| <b>Matériel</b>               | Pour réaliser cette séquence, le formateur aura besoin :<br>- D'un flipchart et de feutres de différentes couleurs (noir, rouge, bleu, vert)<br>- De la version papier de la fiche pratique « Messages clés »<br>- De la version papier du support pour organiser les jeux de rôle n°1 et n°2 |

### **Sous-séquence 5.1 : Rappeler les messages clés**

**Durée :** 5 minutes

**Méthode :** En s'appuyant sur le référentiel technique et le fiche pratique « Messages clés », le formateur rappelle les messages clés vu lors du module 2 et annonce le jeu de rôle à suivre pour chaque catégorie d'acteurs.

### **Sous-séquence 5.2 : Présenter les consignes**

**Durée :** 10 minutes

**Méthode :** En s'appuyant sur le support « jeu de rôle n°1 » et « jeu de rôle n°2 » mis à disposition, le formateur présente les règles de chaque jeu de rôle :

- L'ensemble des participants se répartissent en binômes (A) et (B) ;
- Le formateur distribue aux participants la fiche pratique « messages clés de dispensation » et les scripts propres à chaque jeu de rôle. Ces scripts précisent le scénario à suivre par chaque binôme ;
- Le formateur demande aux participants s'ils ont des questions de compréhensions.

### **Sous-séquence 5.3 : Mettre en exergue les caractéristiques spécifiques de la dispensation non-assistée en présentiel ou à distance (cas des professionnels de santé et des pairs éducateurs)**

**Durée :** 25 minutes

**Méthode :** En s'appuyant sur le support « jeu de rôle n°1 », « jeu de rôle n°2 » et la fiche pratique « Messages clés » mise à disposition, les participants réalisent les jeux de rôles 1 et 2, le cas des professionnels de santé et des pairs éducateurs :

- Certains binômes vont prendre en charge le jeu de rôle n°1 (professionnels de santé) et d'autres vont prendre en charge le jeu de rôle n°2 (par les pairs éducateurs) ;
- Un participant joue (le rôle A) et un autre (le rôle B) pendant une dizaine de minutes ;
- A l'issue de ce premier jeu, le binôme intervertit les rôles pour un deuxième jeu d'une dizaine de minutes : (A) devient (B) et vice-versa ;
- A l'issue du jeu de rôles, le formateur demande aux binômes les points d'apprentissage qui ressortent de cette expérience ;
- Le formateur note les réponses au fur et à mesure et procède à la synthèse des enseignements généraux et des recommandations à mémoriser.

### **Sous-séquence 5.4 : Synthétiser les enseignements**

**Durée :** 10 minutes

**Méthode :** En s'appuyant sur le support « jeu de rôle n°1 », « jeu de rôle n°2 » (partie « débriefing »), la fiche pratique « Messages clés » et le flipchart mis à disposition, le formateur demande aux participants les points d'apprentissages qu'ils retiennent de cet exercice.

En sus, le formateur demande aux participants quelles sont les bonnes pratiques à retenir pour réaliser un exercice de jeu de rôles. Il note les principales propositions et complète s'il observe des imprécisions ou des manques.

**Référentiel technique :**

**Points clés d'apprentissage à mettre en avant dans la conduite du jeu de rôle :**

- Le « scénario » d'un jeu de rôle implique deux éléments :
  - Une description claire du point de départ, par exemple : le contexte, ce qui a mené à la situation de départ, qui est impliqué, dans quelle mesure ?
  - Une indication concernant la réaction ou le comportement potentiel de chaque personne une fois le jeu commencé.
- Le jeu de rôle vise la spontanéité dans un contexte établi. Les acteurs n'ont pas de dialogue spécifique ou un but prédéterminé ;
- Leur fonction est d'explorer ce qui peut se passer et comment les différentes actions ou déclarations peuvent influencer le devenir de la situation ;
- Les jeux de rôles donnent aussi la possibilité aux participants d'envisager ce qu'ils pourraient ressentir face à certaines situations ;
- Le jeu de rôles doit toujours faire l'objet d'un bilan dont on extrait ce qui a été appris pour le transposer au monde réel.

**Avant de clôturer la séquence, le formateur demande aux participants s'ils ont des questions et, le cas échéant, il répond.**

**Demander aux participants s'ils pensent être en mesure de reproduire cette séquence de formation et s'ils ont des questions par rapport à cet aspect.**

|                               |                                                                                                                                                                                                                                                                                                                                                                                                                                                   |
|-------------------------------|---------------------------------------------------------------------------------------------------------------------------------------------------------------------------------------------------------------------------------------------------------------------------------------------------------------------------------------------------------------------------------------------------------------------------------------------------|
| <b>Séquence n°6</b>           | Conseil et messages associés à la dispensation assistée de l'ADVIH.                                                                                                                                                                                                                                                                                                                                                                               |
| <b>Objectifs pédagogiques</b> | A la fin de cette séquence, les participants auront :<br>- Revu les messages clés à transmettre lors de la dispensation de l'ADVIH<br>- Compris les caractéristiques spécifiques de la dispensation assistée en présentiel ou à distance (cas des écoutants hotline), par une mise en situation lors d'un jeu de rôle<br>- Compris les éléments importants de l'exercice de jeu de rôle pour pouvoir le reproduire lors des formations en cascade |
| <b>Durée</b>                  | 1 heure maximum                                                                                                                                                                                                                                                                                                                                                                                                                                   |
| <b>Matériel</b>               | Pour réaliser cette séquence, le formateur aura besoin :<br>- D'un flipchart et de feutres de différentes couleurs (noir, rouge, bleu, vert)<br>- De la version papier de la fiche pratique « Messages clés »<br>- De la version papier du support pour organiser les jeux de rôle n°1 et n°2                                                                                                                                                     |

### **Sous-séquence 6.1 : Présenter les consignes**

**Durée :** 5 minutes

**Méthode :** En s'appuyant sur le support « jeu de rôle n°3 », le formateur présente les règles du jeu de rôle :

- L'ensemble des participants se répartissent en binômes (A) et (B) ;
- Le formateur distribue aux participants la fiche pratique « messages clefs de dispensation » et le script propres au jeu de rôle n°3. Ce script précise le scénario à suivre par chaque binôme ;
- Le formateur demande aux participants s'ils ont des questions de compréhensions.

### **Sous-séquence 6.2 : Mettre en exergue les caractéristiques spécifiques de la dispensation assistée en présentiel ou à distance (cas des écoutants hotline)**

**Durée :** 35 minutes

**Méthode :** En s'appuyant sur le support « jeu de rôle n°3 » et la fiche pratique « Messages clés » mis à disposition, les participants réalisent le jeu de rôles 3, le cas des écoutants hotline :

- Un participant joue (le rôle A) et un autre (le rôle B) pendant une dizaine de minutes ;
- A l'issue de ce premier jeu, le binôme intervertit les rôles pour un deuxième jeu d'une dizaine de minute : (A) devient (B) et vice-versa ;
- A l'issue du jeu de rôles, le formateur demande aux binômes les points d'apprentissage qui ressortent de cette expérience ;
- Le formateur note les réponses au fur et à mesure et procède à la synthèse des enseignements généraux et des recommandations à mémoriser.

### **Sous-séquence 6.3 : Synthétiser les enseignements**

**Durée :** 15 minutes

**Méthode :** En s'appuyant sur le support « jeu de rôle n°3 » (partie « débriefing »), la fiche pratique « Messages clés » et le flipchart mis à disposition, le formateur demande aux participants les points d'apprentissage qu'ils retiennent de cet exercice.

En sus, le formateur demande aux participants quelles sont les bonnes pratiques à retenir pour réaliser un exercice de jeu de rôles. Il note les principales propositions et complète s'il observe des imprécisions ou des manques.

**Référentiel technique :**

**Points clés d'apprentissage à mettre en avant dans la conduite du jeu de rôle :**

- Le « scénario » d'un jeu de rôle implique deux éléments :
  - Une description claire du point de départ, par exemple : le contexte, ce qui a mené à la situation de départ, qui est impliqué, dans quelle mesure ?
  - Une indication concernant la réaction ou le comportement potentiel de chaque personne une fois le jeu commencé.
- Le jeu de rôle vise la spontanéité dans un contexte établi. Les acteurs n'ont pas de dialogue spécifique ou un but prédéterminé ;
- Leur fonction est d'explorer ce qui peut se passer et comment les différentes actions ou déclarations peuvent influencer le devenir de la situation ;
- Les jeux de rôles donnent aussi la possibilité aux participants d'envisager ce qu'ils pourraient ressentir face à certaines situations ;
- Le jeu de rôles doit toujours faire l'objet d'un bilan dont on extrait ce qui a été appris pour le transposer au monde réel.

**Avant de clôturer la séquence, le formateur demande aux participants s'ils ont des questions et, le cas échéant, il répond.**

**Demander aux participants s'ils pensent être en mesure de reproduire cette séquence de formation et s'ils ont des questions par rapport à cet aspect.**

|                               |                                                                                                                                                                                                                                                               |
|-------------------------------|---------------------------------------------------------------------------------------------------------------------------------------------------------------------------------------------------------------------------------------------------------------|
| <b>Séquence n°7</b>           | Les outils de suivi-évaluation.                                                                                                                                                                                                                               |
| <b>Objectifs pédagogiques</b> | A la fin de cette séquence, les participants auront :<br>– Compris et expérimenté l’outil de suivi-évaluation                                                                                                                                                 |
| <b>Durée</b>                  | 55 minutes maximum                                                                                                                                                                                                                                            |
| <b>Matériel</b>               | Pour réaliser cette séquence, le formateur aura besoin :<br>– Du support de présentation PPT<br>– D’un kit de projection (ordinateur, vidéoprojecteur, écran)<br>– Des supports papiers de l’outil de suivi-évaluation (1 exemplaire pour chaque participant) |

### **Sous-séquence 7.1 : Présenter les différents outils**

**Durée :** 25 minutes

**Méthode :** En s’appuyant sur la présentation Power Point (PPT) et des supports papiers de chaque outil de suivi-évaluation mis à disposition, le formateur effectue une présentation sur :

- Les principes et objectifs du suivi évaluation ATLAS : recherche à visée évaluative et intégration au système de santé ;
- Que cherche-t-on à suivre et évaluer : spécificités du projet ATLAS ;
- La collecte de routine par les professionnels de la santé :
  - Pourquoi ?
  - Qui collecte quoi ? Présentation des outils
  - Quand / A quelle fréquence
- Comment (présentation des trois catégories d’outils).

**Référentiel technique :**

#### **Les principes et objectifs du suivi évaluation ATLAS**

Le suivi évaluation est un processus qui permet de suivre, évaluer et d’améliorer la performance et l’impact du projet. Il permet ainsi d’atteindre les objectifs du projet.

Dans le cadre du projet ATLAS plusieurs méthodes de suivi et d’évaluation de la performance et de l’impact ont été développées :

- **La recherche à visée évaluative** qui comprend plusieurs volets :
  - 2 volets qualitatifs mesurant les facteurs et les impacts sociaux auprès des populations clés et les personnes vivant avec le VIH ;
  - 1 enquête téléphonique qui mesure l’efficacité et l’impact de l’ADVIH auprès des usagers et usagers ;
  - 1 volet mesurant les coûts et modélisant le coût efficacité de l’introduction de l’ADVIH afin de permettre à chaque pays d’envisager la mise à l’échelle.
- **La collecte de données permettant d’évaluer indirectement la performance et l’impact** du projet notamment les données de dépistage et d’entrée dans les soins dans les districts où le projet ATLAS est déployé et en les comparant à d’autres districts où l’ADVIH n’est pas disponible.
- **La collecte de données de routine permettant de suivre et d’évaluer la dispensation de kits d’ADVIH** et ainsi d’améliorer en continu les stratégies déployées. Ces données peuvent être qualitatives comme les entretiens réguliers avec les professionnels de la santé et les pairs éducateurs pour avoir un retour sur leurs pratiques ou quantitatives afin de mesurer l’évolution des dispensations.

C’est dans ce dernier cas que des outils ont été spécifiquement développés pour les professionnels de la santé, les pairs éducateurs et les écoutants des lignes téléphoniques gratuites.

Il est important de noter que dans le cadre du projet ATLAS, de par la nature et l'esprit de l'ADVIH (faire le test chez soi) et les populations ciblées (distribution secondaire visant les partenaires et les populations cachées), **il n'est pas demandé pour les professionnels de la santé et les pairs éducateurs de collecter les données de résultats des tests effectués par les personnes** (d'autres méthodes évalueront cet aspect). **Seules les données liées à la dispensation (au distributeur primaire) seront demandées.**

## La collecte de routine par les professionnels de santé / pairs éducateurs et écoutants hotline

### Professionnels de santé

| Méthode                                                                                                                                                                                                                                                                                            | Quoi                                                                                                                                                                                                                                                                                                                                                                                                                                                                                                         | Support                      |
|----------------------------------------------------------------------------------------------------------------------------------------------------------------------------------------------------------------------------------------------------------------------------------------------------|--------------------------------------------------------------------------------------------------------------------------------------------------------------------------------------------------------------------------------------------------------------------------------------------------------------------------------------------------------------------------------------------------------------------------------------------------------------------------------------------------------------|------------------------------|
| <b>Pour les consultations IST, dans des consultations ouvertes à la population générale,</b> les données seront collectées dans les registres de consultation habituels par les professionnels de la santé et agrégées mensuellement dans l'outil/rapport                                          | <ul style="list-style-type: none"> <li>- Nombre de personnes reçues en consultation et/ou ayant bénéficié de soins/traitement pour IST selon l'âge et le sexe</li> <li>- Nombre de personnes ayant effectué un TDR VIH volontairement ou sur proposition du prestataire</li> <li>- Nombre de personnes ayant reçu un autotest VIH sur demande ou sur proposition du prestataire</li> <li>- Nombre d'ADVIHs distribués par le prestataire aux personnes ayant une IST par classe d'âge et par sexe</li> </ul> | Fiche « Consultations IST »  |
| <b>Pour les consultations PVIH dans des centres ouverts à la population générale ou dans des centres dédiés aux populations clés,</b> les données seront collectées dans les registres de consultation habituels par les professionnels de la santé et agrégées mensuellement dans l'outil/rapport | <ul style="list-style-type: none"> <li>- Nombre de personnes vivant avec le VIH sous ARV suivies dans la structure selon l'âge et le sexe</li> <li>- Nombre d'ADVIHs distribués aux Personnes vivant avec le VIH sous ARV suivies dans la structure par âge et par sexe</li> </ul>                                                                                                                                                                                                                           | Fiche « Sites ARV »          |
| <b>Pour les consultations IST/PVIH dédiées aux populations clés (stratégies fixes)</b> les données seront collectées dans les registres de consultation habituels par les professionnels de la santé et agrégées mensuellement dans l'outil/rapport                                                | <b>Pour les HSH :</b>                                                                                                                                                                                                                                                                                                                                                                                                                                                                                        | Fiche « Stratégie fixe HSH » |
|                                                                                                                                                                                                                                                                                                    | <b>Pour les Travailleuses du sexe :</b>                                                                                                                                                                                                                                                                                                                                                                                                                                                                      | Fiche « Stratégie fixe PS »  |
|                                                                                                                                                                                                                                                                                                    | <b>Pour les usagères et usagers de drogues :</b>                                                                                                                                                                                                                                                                                                                                                                                                                                                             | Fiche « Stratégie fixe CDI » |
|                                                                                                                                                                                                                                                                                                    | <b>Pour les jeunes au sein des SSSU (Côte d'Ivoire) :</b>                                                                                                                                                                                                                                                                                                                                                                                                                                                    | Fiche « SSUS »               |



## Pairs éducateurs

| Méthode                                                                                                                                  | Quoi                                                                                                                                                                                                                                                                                                                                                                                                                                      | Support                            |
|------------------------------------------------------------------------------------------------------------------------------------------|-------------------------------------------------------------------------------------------------------------------------------------------------------------------------------------------------------------------------------------------------------------------------------------------------------------------------------------------------------------------------------------------------------------------------------------------|------------------------------------|
| <p>Pour les <b>activités menées par les pairs éducateurs auprès des populations clés</b>, les données seront collectées par activité</p> | <ul style="list-style-type: none"> <li>- Type d'activité</li> <li>- Cible de l'activité</li> <li>- Mentionner si l'activité est spécifique à l'ADVIH</li> <li>- Mentionner si une démonstration a été faite aux participants de l'activité</li> <li>- Age des personnes ayant reçu un/des kits d'ADVIH</li> <li>- Sexe des personnes ayant reçu un/des kits d'ADVIH</li> <li>- Nombre de kits d'ADVIH reçu par chaque personne</li> </ul> | <p>Fiche<br/>« Activités APE »</p> |

## Ecoutant Hotline

| Méthode                                                                                                                                                                                                        | Quoi                                                                                                                                                                                                                                                                                                                                                                                                                                                                                                                                                                                                                                                                                                                                                                                                                                                                                                                                                                                                                                                                                                                                                               | Support                               |
|----------------------------------------------------------------------------------------------------------------------------------------------------------------------------------------------------------------|--------------------------------------------------------------------------------------------------------------------------------------------------------------------------------------------------------------------------------------------------------------------------------------------------------------------------------------------------------------------------------------------------------------------------------------------------------------------------------------------------------------------------------------------------------------------------------------------------------------------------------------------------------------------------------------------------------------------------------------------------------------------------------------------------------------------------------------------------------------------------------------------------------------------------------------------------------------------------------------------------------------------------------------------------------------------------------------------------------------------------------------------------------------------|---------------------------------------|
| <p>Pour les <b>appels reçus par les écoutants d'usagers et usagers d'ADVIH</b>, les données seront collectées sur la base de leur registre habituel (qui sera complété avec les données autour de l'ADVIH)</p> | <ul style="list-style-type: none"> <li>- Date, Heure de l'appel</li> <li>- Age et sexe de l'appelant</li> <li>- Région de l'appel (localisation)</li> <li>- Couleur de l'autocollant présent sur la brochure complémentaire (permettant la traçabilité ADVIH : canal de dispensation et partenaire)</li> <li>- Motif de l'appel (choix multiples : conseil avant dépistage, après dépistage, conseils pour l'utilisation du test, conseils pour interpréter le résultat, conduite à tenir en cas d'ADVIH réactif, référence pour test de confirmation, référence vers un centre de prévention, référence vers un centre de prise en charge, gestion déchets après test, autre)</li> <li>- Conseil délivré par l'écoutant (choix multiples : Conseil avant dépistage, conseil après dépistage, conseils pour l'utilisation du test, conseils pour interpréter le résultat, conduite à tenir en cas d'ADVIH réactif, référence pour test de confirmation, invitation à réitérer le test dans 3 mois, gestion déchets après test, référence vers enquête coupon, autre – notamment en cas de conséquences négatives – mauvaises pratiques liées à l'ADVIH)</li> </ul> | <p>Fiche<br/>« Registre Hotline »</p> |

### Sous-séquence 7.2 : Tester les outils

**Durée :** 25 minutes

**Méthode :** En s'appuyant sur le support papier de l'outil de suivi-évaluation (un exemplaire par participant) :

- Les participants testent chaque outil en les renseignant un par un ;
- Le formateur invite les participants à s'exprimer sur l'exercice de renseignement de chaque catégorie d'outils : y-a-t-il des incompréhensions ou des difficultés particulières ?

**Avant de clôturer la séquence, le formateur demande aux participants s'ils ont des questions et, le cas échéant, il répond.**

**Demander aux participants s'ils pensent être en mesure de reproduire cette séquence de formation et s'ils ont des questions par rapport à cet aspect.**

|                               |                                                                                                                                                                                                                                                                                                                    |
|-------------------------------|--------------------------------------------------------------------------------------------------------------------------------------------------------------------------------------------------------------------------------------------------------------------------------------------------------------------|
| <b>Séquence n°8</b>           | Conclusion                                                                                                                                                                                                                                                                                                         |
| <b>Objectifs pédagogiques</b> | A la fin de cette séquence, les participants auront :<br>- Révisé le matériel de formation des différentes parties prenantes et apprécié les différences de mise en œuvre des formations en cascade<br>- Abordé les éventuels points incompris<br>- Réalisé une évaluation de la formation et procédé à sa clôture |
| <b>Durée</b>                  | 40 minutes maximum                                                                                                                                                                                                                                                                                                 |
| <b>Matériel</b>               | Pour réaliser cette séquence, le formateur aura besoin :<br>- Des kits de formation pour (1) les professionnels de santé, (2) les par les pairs éducateurs, et (3) les écoutants hotline<br>- Du support papier de la fiche d'évaluation de la formation                                                           |

### **Sous-séquence 8.1 : Revenir sur le matériel de formation des différentes parties prenantes**

**Durée :** 15 minutes

**Méthode :** En s'appuyant sur les 3 kits de formation mise à disposition :

- Le formateur procède à une synthèse de ce qui a été vu au cours des 3 jours de formation et revient sur les 3 kits de formation en rappelant la dynamique de formation qui a été employée ;
- Le formateur revient également sur les techniques d'animation et les outils utilisés sont les mêmes que ceux qu'ils devront employer dans les formations ;
- Bien entendu quelques ajustements seront apportés, puisque la formation en andragogie ne sera pas dispensée et que la formation durera 2 jours.

### **Sous-séquence 8.2 : Revenir sur des points incompris et clôturer la formation**

**Durée :** 15 minutes

**Méthode :** Le formateur invite les participants à s'exprimer sur des interrogations, des difficultés ou des craintes qu'ils pourraient avoir, avant de clôturer la formation. Le formateur souhaite bonne chance aux apprenants pour la future reproduction de la formation auprès des différents publics cibles.

### **Sous-séquence 8.3 : Apprécier le niveau de satisfaction des participants selon différents paramètres**

**Durée :** 10 minutes

**Méthode :**

- Le formateur distribue la fiche d'évaluation aux apprenants qui procède à leur renseignement
- Le formateur fera une synthèse des fiches d'évaluation à l'issue de la formation

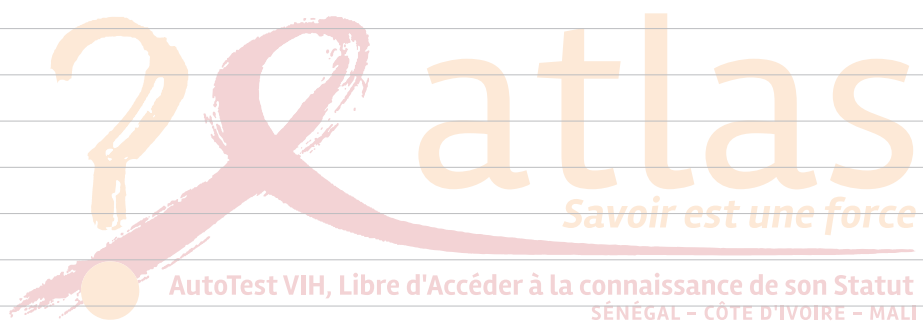

Le projet ATLAS est mis en œuvre en Côte d'Ivoire  
en partenariat avec le Ministère de la Santé  
et de l'Hygiène Publique  
et le Programme National  
de Lutte contre le Sida.

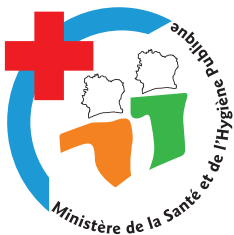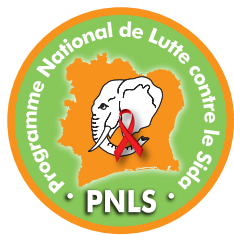

Ce document peut être utilisé ou reproduit sous réserve de mentionner la source,  
et uniquement pour un usage non commercial.

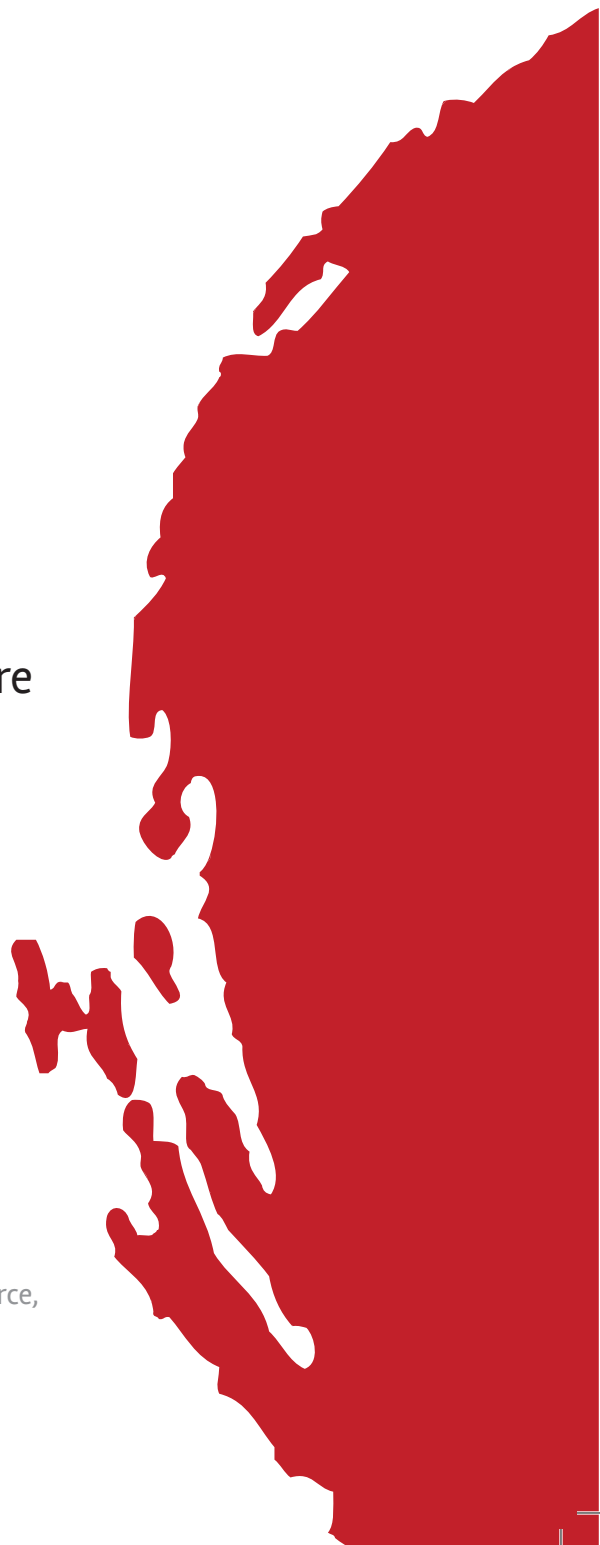

Supplement: 12879_2023_8625_MOESM5_ESM.pdf [file 12879_2023_8625_MOESM5_ESM.pdf]
