# Supplementary material for: Organisation of testing services, structural barriers and facilitators of routine HIV self-testing during sexually transmitted infection consultations: a qualitative study of patients and providers in Abidjan, Côte d’Ivoire
Source: PubMed Central journal article supplement (PMC10900544; doi:10.1186/s12879-023-08625-x), 2024-02-27
Supplement: 12879_2023_8625_MOESM6_ESM.pdf [file 12879_2023_8625_MOESM6_ESM.pdf]

6-Table 3: Information of health professionals

| Pseudo           | Service   | Age-range | Sex   | Education level | Profession       | Self-test distribution training by Solthis |
|------------------|-----------|-----------|-------|-----------------|------------------|--------------------------------------------|
| Midwife 1        | Service 1 | 36-40     | Woman | High            | Midwife          | Full training                              |
| Midwife 2        | Service 1 | 41-45     | Woman | High            | Midwife          | Full training                              |
| Midwife 3        | Service 1 | 31-35     | Woman | High            | Midwife          | Full training                              |
|                  |           |           |       |                 |                  |                                            |
| Nurse 1          | Service 2 | 26-30     | Man   | High            | Nurse            | Full training                              |
| Nurse 2          | Service 2 | 46-50     | Woman | High            | Nurse            | No training                                |
| Nurse 3          | Service 2 | 36-40     | Man   | High            | Nurse            | No training                                |
| Nurse 4          | Service 2 | 36-40     | Man   | High            | Nurse            | No training                                |
| Clinical advisor | Service 2 | 36-40     | Woman | Secondary       | Clinical advisor | Full training                              |
| Social worker    | Service 2 | 31-35     | Woman | High            | Social worker    | Full training                              |
| Care assistant   | Service 2 | 31-35     | Woman | Secondary       | Care assistant   | Training on site                           |
| Doctor 1         | Service 2 | 46-50     | Man   | High            | Doctor           | Full training                              |
| Doctor 2         | Service 2 | 41-45     | Woman | High            | Doctor           | No training                                |
| Doctor 3         | Service 2 | 41-45     | Woman | High            | Doctor           | No training                                |
|                  |           |           |       |                 |                  |                                            |
| Nurse 1          | Service 3 | 41-45     | Woman | High            | Nurse            | Full training                              |
| Nurse 2          | Service 3 | 41-45     | Woman | High            | Nurse            | Make-up training                           |
| Doctor 1         | Service 3 | 46-50     | Man   | High            | Doctor           | Make-up training                           |
| Doctor 2         | Service 3 | 41-45     | Man   | High            | Doctor           | Make-up training                           |
| Doctor 3         | Service 3 | 36-40     | Woman | High            | Doctor           | Make-up training                           |
