# Supplementary material for: Organisation of testing services, structural barriers and facilitators of routine HIV self-testing during sexually transmitted infection consultations: a qualitative study of patients and providers in Abidjan, Côte d’Ivoire
Source: PubMed Central journal article supplement (PMC10900544; doi:10.1186/s12879-023-08625-x), 2024-02-27
Supplement: 12879_2023_8625_MOESM8_ESM.pdf [file 12879_2023_8625_MOESM8_ESM.pdf]

8-Table 1: Information of patients whose consultations were observed

| Service        | Sex   | Consultation reason          | Marital status    | Age range | Total |
|----------------|-------|------------------------------|-------------------|-----------|-------|
| Maternity/ANC  | Woman | ANC <sup>1</sup>             | In a Relationship | 25-49     | 29    |
| Maternity/ANC  | Woman | ANC                          | NI <sup>2</sup>   | 25-49     |       |
| Maternity/ANC  | Woman | ANC                          | Married           | <24       |       |
| Maternity/ANC  | Woman | ANC                          | Married           | 25-49     |       |
| Maternity/ANC  | Woman | ANC                          | Married           | 25-49     |       |
| Maternity/ANC  | Woman | ANC                          | Married           | 25-49     |       |
| Maternity/ANC  | Woman | ANC                          | NI                | 25-49     |       |
| Maternity/ANC  | Woman | ANC                          | NI                | <24       |       |
| Maternity/ANC  | Woman | ANC                          | Married           | 25-49     |       |
| Maternity/ANC  | Woman | ANC                          | Married           | 25-49     |       |
| Maternity/ANC  | Woman | ANC                          | NI                | 25-49     |       |
| Maternity/ANC  | Woman | ANC                          | In a Relationship | <24       |       |
| Maternity/ANC  | Woman | ANC                          | NI                | <24       |       |
| Maternity/ANC  | Woman | ANC                          | Married           | 25-49     |       |
| Maternity/ANC  | Woman | ANC                          | Married           | 25-49     |       |
| Maternity/ANC  | Woman | ANC                          | NI                | 25-49     |       |
| Maternity/ANC  | Woman | ANC                          | Married           | <24       |       |
| Maternity/ANC  | Woman | ANC                          | Married           | 25-49     |       |
| Maternity/ANC  | Woman | ANC                          | Married           | 25-49     |       |
| Maternity/ANC  | Woman | ANC                          | Married           | <24       |       |
| Maternity/ANC  | Woman | ANC                          | Married           | 25-49     |       |
| Maternity/ANC  | Woman | ANC                          | In a Relationship | <24       |       |
| Maternity/ANC  | Woman | ANC                          | In a Relationship | <24       |       |
| Maternity/ANC  | Woman | ANC                          | In a Relationship | 25-49     |       |
| Maternity/ANC  | Woman | ANC                          | In a Relationship | 25-49     |       |
| Maternity/ANC  | Woman | ANC                          | In a Relationship | <24       |       |
| Maternity/ANC  | Woman | ANC                          | In a Relationship | <24       |       |
| Maternity/ANC  | Woman | ANC                          | In a Relationship | <24       |       |
| Maternity/ANC  | Woman | ANC                          | NI                | 25-49     |       |
| General Clinic | Woman | RFS <sup>3</sup>             | Single            | 25-49     | 16    |
| General Clinic | Woman | Reference for HIV rapid test | Single            | 25-49     |       |
| General Clinic | Woman | STI                          | Single            | <24       |       |
| General Clinic | Woman | Reference for HIV rapid test | Single            | <24       |       |

<sup>1</sup> Antenatal clinic visits

<sup>2</sup> No Information

<sup>3</sup> Reference for screening

|                |       |                              |                   |       |
|----------------|-------|------------------------------|-------------------|-------|
| General Clinic | Woman | STI                          | In a Relationship | 25-49 |
| General Clinic | Man   | Reference for HIV rapid test | Single            | 25-49 |
| General Clinic | Man   | STI                          | Single            | <24   |
| General Clinic | Woman | STI                          | NI                | <24   |
| General Clinic | Woman | STI                          | NI                | <24   |
| General Clinic | Man   | STI                          | Single            | 25-49 |
| General Clinic | Woman | STI                          | Single            | 25-49 |
| General Clinic | Man   | Other                        | Married           | 25-49 |
| Clinic         | Man   | STI                          | Married           | 25-49 |
| General Clinic | Woman | STI                          | NI                | 25-49 |
| General Clinic | Woman | STI                          | In a Relationship | <24   |
| General Clinic | Woman | STI                          | Married           | 25-49 |
| STI Clinic     | Woman | STI                          | In a Relationship | 25-49 |
| STI Clinic     | Man   | STI                          | In a Relationship | 25-49 |
| STI Clinic     | Woman | STI                          | In a Relationship | <24   |
| STI Clinic     | Man   | STI                          | In a Relationship | 25-49 |
| STI Clinic     | Woman | STI                          | In a Relationship | 25-49 |
| STI Clinic     | Woman | STI                          | In a Relationship | 25-49 |
| STI Clinic     | Man   | STI                          | Married           | 25-49 |
| STI Clinic     | Woman | STI                          | In a Relationship | 25-49 |
| STI Clinic     | Woman | STI                          | Single            | 25-49 |
| STI Clinic     | Woman | STI                          | In a Relationship | 25-49 |
| STI Clinic     | Man   | STI                          | Married           | 25-49 |
| STI Clinic     | Woman | STI                          | Single            | <24   |
| STI Clinic     | Man   | STI                          | In a Relationship | 25-49 |
| STI Clinic     | Man   | STI                          | In a Relationship | 25-49 |
| STI Clinic     | Man   | STI                          | Married           | 25-49 |
| STI Clinic     | Woman | STI                          | Single            | <24   |
| STI Clinic     | Woman | STI                          | Married           | 25-49 |
| STI Clinic     | Woman | STI                          | In a Relationship | <24   |
| STI Clinic     | Woman | STI                          | In a Relationship | 25-49 |
| STI Clinic     | Woman | STI                          | In a Relationship | 25-49 |
| STI Clinic     | Woman | STI                          | In a Relationship | 25-49 |
| STI Clinic     | Woman | STI                          | In a Relationship | 25-49 |
| STI Clinic     | Man   | STI                          | In a Relationship | 25-49 |
| STI Clinic     | Man   | STI                          | In a Relationship | 25-49 |
| STI Clinic     | Man   | STI                          | Married           | 25-49 |
| STI Clinic     | Man   | STI                          | In a Relationship | 25-49 |
| STI Clinic     | Man   | STI                          | Married           | 25-49 |
| STI Clinic     | Woman | STI                          | Married           | 25-49 |
| STI Clinic     | Man   | STI                          | Single            | <24   |
| STI Clinic     | Woman | STI                          | In a Relationship | 25-49 |

53

|            |       |     |                   |       |
|------------|-------|-----|-------------------|-------|
| STI Clinic | Man   | STI | In a Relationship | 25-49 |
| STI Clinic | Woman | STI | Married           | 25-49 |
| STI Clinic | Man   | STI | In a Relationship | 25-49 |
| STI Clinic | Man   | STI | Single            | 25-49 |
| STI Clinic | Woman | STI | In a Relationship | <24   |
| STI Clinic | Woman | STI | In a Relationship | 25-49 |
| STI Clinic | Man   | STI | Married           | 25-49 |
| STI Clinic | Man   | STI | In a Relationship | 25-49 |
| STI Clinic | Woman | STI | In a Relationship | 25-49 |
| STI Clinic | Man   | STI | In a Relationship | 25-49 |
| STI Clinic | Man   | STI | In a Relationship | 25-49 |
| STI Clinic | Woman | STI | In a Relationship | 25-49 |
| STI Clinic | Woman | STI | In a Relationship | 25-49 |
| STI Clinic | Woman | STI | In a Relationship | 25-49 |
| STI Clinic | Man   | STI | Single            | 25-49 |
| STI Clinic | Woman | STI | In a Relationship | <24   |
| STI Clinic | Man   | STI | Single            | 25-49 |
| STI Clinic | Man   | STI | In a Relationship | 25-49 |
| STI Clinic | Woman | STI | In a Relationship | 25-49 |
| STI Clinic | Man   | STI | In a Relationship | 25-49 |
| STI Clinic | Woman | STI | Married           | 25-49 |
| STI Clinic | Man   | STI | Married           | 25-49 |
| STI Clinic | Woman | STI | In a Relationship | 25-49 |
