# Supplementary material for: Organisation of testing services, structural barriers and facilitators of routine HIV self-testing during sexually transmitted infection consultations: a qualitative study of patients and providers in Abidjan, Côte d’Ivoire
Source: PubMed Central journal article supplement (PMC10900544; doi:10.1186/s12879-023-08625-x), 2024-02-27
Supplement: 12879_2023_8625_MOESM9_ESM.pdf [file 12879_2023_8625_MOESM9_ESM.pdf]

9-Table 2: Information of patients who participated in the interviews

| Pseudo                     | Sex   | Marital status    | Profession     | Age range | Education level | HIVST receipt for ego | HIVST receipt for partner | HIVST proposed to partner | Partner's reaction | HIVST use     |
|----------------------------|-------|-------------------|----------------|-----------|-----------------|-----------------------|---------------------------|---------------------------|--------------------|---------------|
| P <sup>1</sup> 2 Service 1 | Woman | In a Relationship | Informal work  | 16-20     | Secondary       | No                    | Yes/1                     | Yes                       | Accepted           | Completed     |
| P3Service1                 | Woman | In a Relationship | Informal work  | 31-35     | Primary         | No                    | Yes/1                     | Yes                       | Accepted           | Completed     |
| P4Service1                 | Woman | In a Relationship | Elève          | 16-20     | Secondary       | No                    | Yes/1                     | Yes                       | Refused            | Completed     |
| P5Service1                 | Woman | In a Relationship | Informal work  | 21-25     | Primary         | No                    | Yes/1                     | Yes                       | Accepted           | No            |
| P6Service1                 | Woman | Mared             | Informal work  | 31-35     | Primary         | No                    | Yes/1                     | Yes                       | Accepted           | Completed     |
| P7.Service2                | Woman | In a Relationship | Public servant | 31-35     | Secondary       | No                    | Yes/1                     | No                        | NA                 | NA            |
| P1Service2                 | Woman | In a Relationship | NI             | 16-20     | Secondary       | No                    | Yes/1                     | No                        | NA                 | No            |
| P1Service 3                | Woman | In a Relationship | Student        | 21-25     | Higher          | No                    | Yes/1                     | Yes                       | Accepted           | Completed     |
| P2Service 3                | Man   | In a Relationship | Public servant | 36-40     | Higher          | No                    | Yes/1                     | Yes                       | Accepted           | No            |
| P3Service 3                | Man   | In a Relationship | Public servant | 36-40     | Higher          | No                    | Yes/3                     | Yes                       | Accepted           | 2/3 Completed |
| P4Service 3                | Woman | In a Relationship | Student        | 31-35     | Higher          | No                    | Yes/1                     | Yes                       | Refused            | No            |
| P5Service 3                | Woman | In a Relationship | Informal work  | 36-40     | Higher          | No                    | Yes/1                     | Yes                       | Accepted           | No            |
| P6Service 3                | Woman | In a Relationship | Informal work  | 21-25     | Secondary       | No                    | Yes/1                     | Yes                       | Accepted           | Completed     |
| P7Service 3                | Woman | In a Relationship | Student        | 26-30     | Higher          | No                    | Yes/1                     | Yes                       | Refused            | No            |
| P8Service 3                | Woman | In a Relationship | Public servant | 26-30     | Higher          | No                    | Yes/1                     | Yes                       | Accepted           | Completed     |
| P9Service 3                | Man   | In a Relationship | Public servant | 46-50     | Higher          | Yes/1                 | No                        | NA                        | NA                 | NA            |
| P10Service 3               | Man   | mared             | Public servant | 46-50     | Secondary       | No                    | Yes/1                     | Yes                       | Accepted           | Completed     |
| P11Service 3               | Woman | mared             | Public servant | 36-40     | Higher          | No                    | Yes/1                     | Yes                       | Accepted           | No            |
| P12Service 3               | Woman | In a Relationship | Public servant | 36-40     | Higher          | No                    | Yes/1                     | Yes                       | Refused            | No            |
| P13Service 3               | Woman | In a Relationship | Informal work  | 41-45     | Higher          | No                    | Yes/1                     | Yes                       | Refused            | No            |

<sup>1</sup> P=Patient
