# Supplementary material for: Organisation of testing services, structural barriers and facilitators of routine HIV self-testing during sexually transmitted infection consultations: a qualitative study of patients and providers in Abidjan, Côte d’Ivoire
Source: PubMed Central journal article supplement (PMC10900544; doi:10.1186/s12879-023-08625-x), 2024-02-27
Supplement: 12879_2023_8625_MOESM10_ESM.pdf [file 12879_2023_8625_MOESM10_ESM.pdf]

## 10-Thematic interview guide - health personnel

| <b>THEMES</b>                                                                                 | <b>QUESTIONS</b>                                                                                                                                                                                                                                                                                                                                                                                                                                                                                                                                              |
|-----------------------------------------------------------------------------------------------|---------------------------------------------------------------------------------------------------------------------------------------------------------------------------------------------------------------------------------------------------------------------------------------------------------------------------------------------------------------------------------------------------------------------------------------------------------------------------------------------------------------------------------------------------------------|
| <b>General information</b>                                                                    | <ul style="list-style-type: none"> <li>• Age</li> <li>• Professional training</li> <li>• Place of work</li> <li>• Professional activity</li> </ul>                                                                                                                                                                                                                                                                                                                                                                                                            |
| <b>Activities and management of HIV and STI patients</b>                                      | <ul style="list-style-type: none"> <li>• Description of department activities (tasks and patient flow)</li> <li>• Involvement in the management of HIV</li> <li>• Management and follow-up of STI patients</li> </ul>                                                                                                                                                                                                                                                                                                                                         |
| <b>HIV testing offer for STI patients' before HIVST</b>                                       | <ul style="list-style-type: none"> <li>• Before HIVST introduction, did you offer testing to patients who presented with STIs?</li> <li>• If so, what HIV testing strategies were in place at your facility to screen STI patients and their partners?</li> <li>• What difficulties do you face in HIV testing proposal for STI patients and their partners?</li> </ul>                                                                                                                                                                                       |
| <b>Setting up HIVST</b>                                                                       | <ul style="list-style-type: none"> <li>• When and how was HIVST set up for STI patients and their partners?</li> <li>• What was the mechanism mobilised to set up HIVST?</li> <li>• What is your level of involvement in setting up the HIVST?</li> <li>• Have you received training on HIVST? If yes, when? How many times? By whom?</li> <li>• What did you learn about the dispensing of HIVST kits, particularly the dispensing channels?</li> <li>• Have you noted any difficulties, limitations or strengths in the implementation of HIVST?</li> </ul> |
| <b>HIVST and dispensing HIVST kits to patients for their partners</b>                         | <ul style="list-style-type: none"> <li>• On what basis do you select the STI patients to whom you dispense HIVST kits?</li> <li>• Can you describe how you dispense HIVST kits to STI patients themselves and to their partners (content of information presented to them, terms used to present HIVST kits, time...)?</li> </ul>                                                                                                                                                                                                                             |
| <b>Attitudes of STI patients towards the offer of HIVST for themselves and their partners</b> | <ul style="list-style-type: none"> <li>• Can you describe the reactions of STI patients to the offer of HIV treatment (refusal/acceptance/hesitation/questions)?</li> <li>• What are the reactions of STI patients and partners to the results after testing? (Do they inform the clinic about the results? How? [By phone, face to face, accompanied, indirect information via the partner] What is the timeframe?)</li> </ul>                                                                                                                               |
| <b>Attitudes of STI patients and/or partners after HIVST</b>                                  | <ul style="list-style-type: none"> <li>• Do patients confirm their status if they receive a reactive result following HIVST?</li> <li>• What is the role of the STI patient in accompanying his or her partner?</li> <li>• What is the caregiver-patient relationship when HIVST is performed?</li> <li>•</li> </ul>                                                                                                                                                                                                                                          |
| <b>Perceptions and appreciation of HIVST kits and their dispensing</b>                        | <ul style="list-style-type: none"> <li>• How do you feel about HIVST? (List strengths, limitations...)</li> </ul>                                                                                                                                                                                                                                                                                                                                                                                                                                             |

|                                                                                                            |                                                                                                                                                                                                                                                                                                |
|------------------------------------------------------------------------------------------------------------|------------------------------------------------------------------------------------------------------------------------------------------------------------------------------------------------------------------------------------------------------------------------------------------------|
| <i>among STI patients and their partners</i>                                                               | <ul style="list-style-type: none"> <li>• How do you like the delivery of HIVST through this channel? (List benefits, limitations, fears, difficulties, workload...)</li> </ul>                                                                                                                 |
| <i>Suggestions and recommendations for the dispensing of HIVST kits to STI patients and their partners</i> | <ul style="list-style-type: none"> <li>• Do you have any recommendations for better distribution and use of HIVST in the general population and in particular to STI patients?</li> <li>• Do you have any questions?</li> <li>• What is your final word?</li> <li>• Acknowledgement</li> </ul> |
