# Supplementary material for: Organisation of testing services, structural barriers and facilitators of routine HIV self-testing during sexually transmitted infection consultations: a qualitative study of patients and providers in Abidjan, Côte d’Ivoire
Source: PubMed Central journal article supplement (PMC10900544; doi:10.1186/s12879-023-08625-x), 2024-02-27
Supplement: 12879_2023_8625_MOESM11_ESM.pdf [file 12879_2023_8625_MOESM11_ESM.pdf]

## 11-Thematic interview guide – STI patients

| <b>THEMES</b>                                                                                                                                         | <b>QUESTIONS</b>                                                                                                                                                                                                                                                                                                                                                                                                                                                                                                                                                                                                                                                       |
|-------------------------------------------------------------------------------------------------------------------------------------------------------|------------------------------------------------------------------------------------------------------------------------------------------------------------------------------------------------------------------------------------------------------------------------------------------------------------------------------------------------------------------------------------------------------------------------------------------------------------------------------------------------------------------------------------------------------------------------------------------------------------------------------------------------------------------------|
| <b>General information</b>                                                                                                                            | <ul style="list-style-type: none"> <li>• Age (ego)</li> <li>• Sex (ego and partner(s))</li> <li>• Profession (ego and partner(s))</li> <li>• Place of residence (ego and partner(s))</li> <li>• Family environment, marital status, number of children</li> <li>• Education/Level of schooling (ego and partner(s))</li> <li>• Religion (ego and partner(s))</li> <li>• Ethnicity (ego and partner(s))</li> </ul>                                                                                                                                                                                                                                                      |
| <b>Knowledge of STIs:</b><br><i>Sources of knowledge</i><br><i>Manifestations</i><br><i>Modes of transmission</i><br><i>Prevention/treatment/cure</i> | <ul style="list-style-type: none"> <li>• Can you tell me where you first heard about sexually transmitted infections (STIs)? (Probe for knowledge of STIs)</li> <li>• What are some local terms used for STIs?</li> <li>• Can you give me names of STIs?</li> <li>• What are the manifestations of the disease (STIs)?</li> <li>• What are the modes of transmission?</li> <li>• How can I prevent or protect myself?</li> <li>• Are there any treatments for STIs?</li> <li>• Can an STI be cured?</li> </ul>                                                                                                                                                         |
| <b>STI prevention and consultation</b>                                                                                                                | <ul style="list-style-type: none"> <li>• What preventive measures do you take to avoid the risk of contracting STI?</li> <li>• Have you ever had an STI consultation (before last visit)? If yes, when? How many times?</li> <li>• Reasons and circumstances of the consultation?</li> <li>• Were you offered HIV testing as a result of the visit?</li> <li>• Did you tell your partner(s) about the visit?</li> </ul>                                                                                                                                                                                                                                                |
| <b>Care Itinerary</b>                                                                                                                                 | <ul style="list-style-type: none"> <li>• Can you describe your care itinerary when you felt the symptoms (self-medication, direct consultation at a health facility, healer?)</li> <li>• If you self-medicate, can you give me the names of the drugs or products used?</li> <li>• Did you feel any improvement after using these products?</li> <li>• If you used a formal health facility, can you tell us about your consultation (diagnosis of the health care provider, treatment proposal (with partner?), follow-up...)</li> <li>• If you used a traditional healer, can you tell us about your consultation (diagnosis, proposed treatment, use...)</li> </ul> |
| <b>Knowledge of HIV:</b><br><i>Sources of Knowledge</i><br><i>Manifestations</i>                                                                      | <ul style="list-style-type: none"> <li>• Can you tell me where you first heard about HIV?</li> <li>• What are the manifestations of the disease?</li> <li>• What are the modes of transmission?</li> <li>• How can you prevent it?</li> </ul>                                                                                                                                                                                                                                                                                                                                                                                                                          |

|                                                                                                                                                                                                                                                               |                                                                                                                                                                                                                                                                                                                                                                                                                                                                                                                                                                                              |
|---------------------------------------------------------------------------------------------------------------------------------------------------------------------------------------------------------------------------------------------------------------|----------------------------------------------------------------------------------------------------------------------------------------------------------------------------------------------------------------------------------------------------------------------------------------------------------------------------------------------------------------------------------------------------------------------------------------------------------------------------------------------------------------------------------------------------------------------------------------------|
| <p><i>Modes of transmission</i></p> <p><i>Prevention/treatment/cure</i></p>                                                                                                                                                                                   | <ul style="list-style-type: none"> <li>• Is there a treatment for HIV?</li> <li>• Is there a cure for HIV?</li> </ul>                                                                                                                                                                                                                                                                                                                                                                                                                                                                        |
| <p><b>HIV prevention and testing practices (pre-HIVST):</b></p> <p><i>Attitudes towards HIV risk</i></p> <p><i>Testing practices</i></p> <p><i>Information on the serological status of family members/partners</i></p> <p><i>Communication about HIV</i></p> | <ul style="list-style-type: none"> <li>• What prevention measures do you take to avoid the risk of HIV transmission?</li> <li>• Have you ever been tested for HIV? If so, how many times? Why and under what circumstances have you been tested?</li> <li>• Do you know the HIV status of your family/partner(s)?</li> <li>• Do you ever discussed HIV with your partner(s)?</li> </ul>                                                                                                                                                                                                      |
| <p><b>Perceived risk of HIV infection</b></p>                                                                                                                                                                                                                 | <ul style="list-style-type: none"> <li>• Do you think you are at risk for HIV?</li> <li>• If so, why?</li> <li>• Are there any people who might be at greater risk of HIV infection? If so, who and why?</li> <li>• Do you think people with an STI might be at greater risk of getting HIV?</li> </ul>                                                                                                                                                                                                                                                                                      |
| <p><b>Knowledge about HIVST:</b></p> <p><i>Sources of knowledge about HIVST-AIDS</i></p> <p><i>Knowledge Content</i></p>                                                                                                                                      | <ul style="list-style-type: none"> <li>• Have you heard of HIV self-testing (before proposal)?</li> <li>• If so, where and by whom?</li> <li>• What do you know about HIVST?</li> </ul>                                                                                                                                                                                                                                                                                                                                                                                                      |
| <p><b>Provider's HIVST proposal to the patient (How it was proposed by the provider)</b></p>                                                                                                                                                                  | <ul style="list-style-type: none"> <li>• Can you describe you were offered to deliver an HIVST your partner, the content of the information, the medium, and the terms used?</li> <li>• What did you understand about HIVST? (Probe the patient's understanding of the way the HIVST was presented to him or her (objective, use, note the terms used...))</li> <li>• How did you react to the proposal?</li> <li>• Can you describe your acceptance/refusal to offer the test to your partner?</li> <li>• What were your reasons, motivations, expected benefits or limitations?</li> </ul> |
| <p><b>Proposal of the HIVST to his or her partner(s) (How the patient proposed HIVST to his or her partner)</b></p>                                                                                                                                           | <p>If accepted:</p> <ul style="list-style-type: none"> <li>• To which partner (if multiple partners)?</li> <li>• What is your relationship with the partner(s) (married, cohabitating, occasional partner)</li> <li>• How was the proposal made to the partner (time, place, content of the information, medium, terms used, etc.)?</li> <li>• What were the reactions of the partner: acceptance of the self test, refusal (why?), time needed for reflection, search for additional information, from whom (including internet)?</li> </ul>                                                |
| <p><b>Practices and usage</b></p>                                                                                                                                                                                                                             | <ul style="list-style-type: none"> <li>• Self-testing practice: Can you describe where and how the HIV test took place and whether it took place with your partner or alone?</li> <li>• Ease/difficulty of use? Ease/difficulty of understanding the test result?</li> <li>• Test result: Did you share the information with your partner? With other people?</li> </ul>                                                                                                                                                                                                                     |

|                                                                                                                                                                                                                                                                                                                                                 |                                                                                                                                                                                                                                                                                                                                                                                                                                                                                                                                                            |
|-------------------------------------------------------------------------------------------------------------------------------------------------------------------------------------------------------------------------------------------------------------------------------------------------------------------------------------------------|------------------------------------------------------------------------------------------------------------------------------------------------------------------------------------------------------------------------------------------------------------------------------------------------------------------------------------------------------------------------------------------------------------------------------------------------------------------------------------------------------------------------------------------------------------|
|                                                                                                                                                                                                                                                                                                                                                 | <ul style="list-style-type: none"> <li>• Perception of the test results: Did you think the test was reliable, did you have doubt?</li> <li>• Steps taken after the test, depending on the result. If reactive result, what did you do (call the hotline?) Medical consultation (alone or accompanied by the partner?), implementation of a follow-up, treatment...</li> </ul>                                                                                                                                                                              |
| <p><b>Perceptions of HIVST and the impact of HIVST:</b></p> <p><i>On the relationship: trust, communication, distance, violence, sexuality...</i></p> <p><i>On access to and relationship with care (especially if the result is positive)</i></p> <p><i>On HIV testing practices, prevention practices, relationship with HIV, risk...</i></p> | <ul style="list-style-type: none"> <li>• How do you feel about HIVST?</li> <li>• What impact has the use of HIVST had on your relationship with your partner(s)? (Depending on the results)</li> <li>• If positive: what was the attitude of your partner(s) when sharing your HIV status? (Probe for trust, support or rejection, break-up, violence, stigma...)</li> <li>• Have you discussed with your partner(s) treatment, prevention practices to avoid the risk of transmission/or “overcontamination” (if partner is also HIV positive)</li> </ul> |
| <p><b>Recommendations, suggestions, questions, final comments</b></p>                                                                                                                                                                                                                                                                           | <ul style="list-style-type: none"> <li>• Do you have any recommendations for better distribution and use of HIVST in the general population, especially for those who refuse or do not have access to conventional tests?</li> <li>• Do you have any questions?</li> <li>• Do you have any final comments?</li> <li>• Acknowledgements</li> </ul>                                                                                                                                                                                                          |
