# Supplementary material for: Organisation of testing services, structural barriers and facilitators of routine HIV self-testing during sexually transmitted infection consultations: a qualitative study of patients and providers in Abidjan, Côte d’Ivoire
Source: PubMed Central journal article supplement (PMC10900544; doi:10.1186/s12879-023-08625-x), 2024-02-27

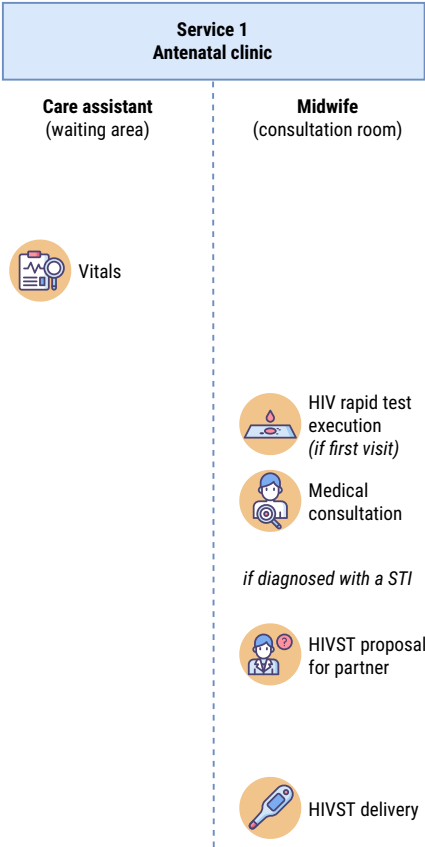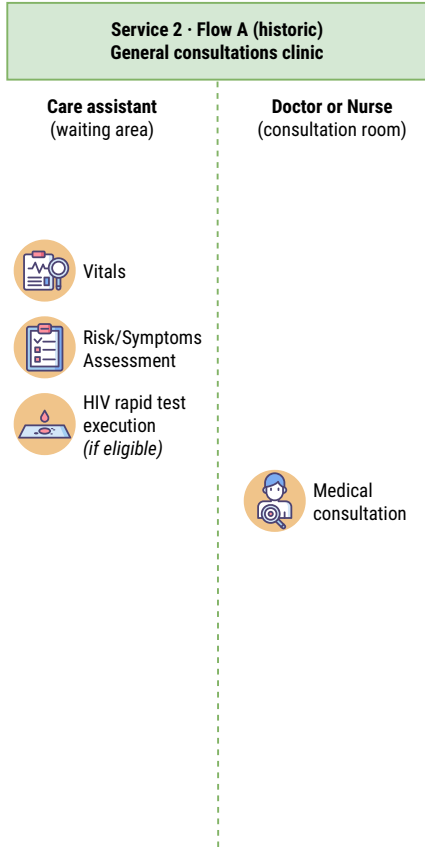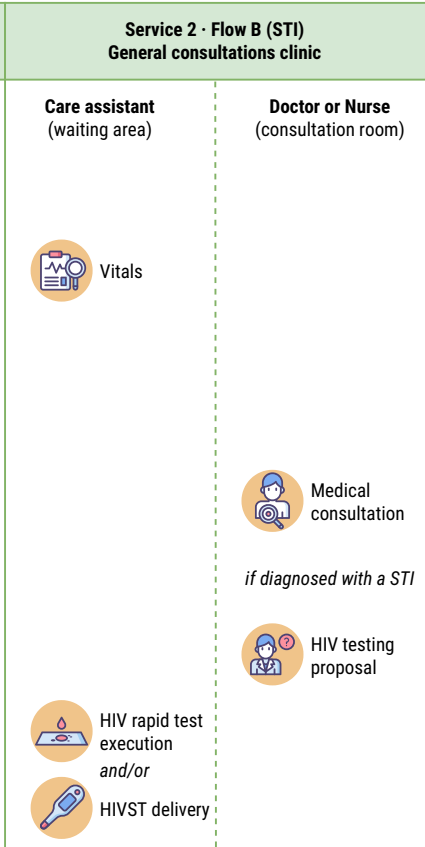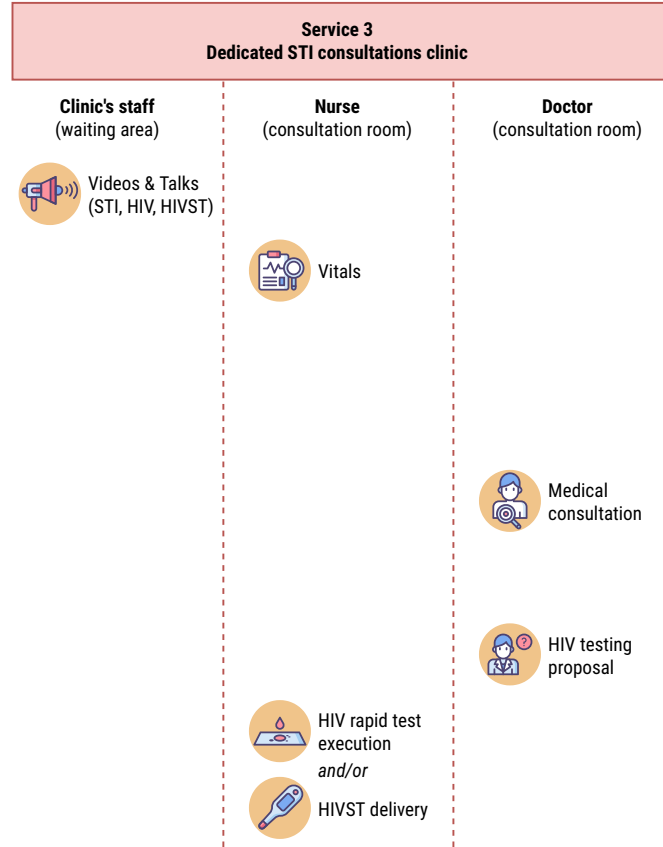

Supplement: 12879_2023_8625_MOESM12_ESM.pdf [file 12879_2023_8625_MOESM12_ESM.pdf]
